# Supplementary material
Source: PubMed Central journal article supplement (PMC2845155)

# Supporting Information

## Bacterial AmpD at the Crossroads of Peptidoglycan Recycling and Manifestation of Antibiotic Resistance

*Mijoon Lee, Weilie Zhang, Dusan Heseck, Bruce C. Noll, Bill Boggess and Shahriar Mobashery\**

Department of Chemistry and Biochemistry, University of Notre Dame, Notre Dame, IN 46556

### Contents

|                                                                                                                 |     |
|-----------------------------------------------------------------------------------------------------------------|-----|
| Experimental Procedures .....                                                                                   | S2  |
| Figure S1. SDS-PAGE analysis of the purified AmpD .....                                                         | S2  |
| Figure S2. MALDI mass spectrum of the purified AmpD .....                                                       | S3  |
| Figure S3. The AmpD reaction with compound <b>2a</b> .....                                                      | S5  |
| Figure S4. ESL-LC-MS analysis of the AmpD reaction products and comparison to authentic synthetic samples ..... | S6  |
| Table S1. Crystallographic details of compound <b>11</b> .....                                                  | S9  |
| Table S2. Hydrogen-bond geometry of compound <b>11</b> .....                                                    | S9  |
| Figure S5. ORTEP diagrams of compound <b>11</b> .....                                                           | S10 |
| Figure S6. Hydrogen-bond pattern of compound <b>11</b> .....                                                    | S11 |
| Copies of <sup>1</sup> H, <sup>13</sup> C, and 2D NMR Spectra .....                                             | S12 |

## Experimental Procedures

**Cloning of the *ampD* gene from *Citrobacter freundii*.** The *ampD* gene was amplified by PCR from the chromosome of *C. freundii* (ATCC6879) using two custom-synthesized primers AmpDNdeI: 5'-GCGTCATATGTTGTTAGACGAGGGCTGGCTGGCA-3' and AmpDHind: 5'-CGATAAGCTTTCA TGTCATCTCCTTGTGTGACGAGGGGGT-3' (the Nde I and Hind III sites are underlined). The resulting PCR products were digested by the Nde I and Hind III, and ligated into the polylinker of pET24a(+) vector under the T7 promoter. The vectors were transformed into *Escherichia coli* JM83. The selection of transformants was performed on LB agar supplemented with ampicillin (100 µg/mL). The nucleotide sequences of the *ampD* gene from several transformants were verified by sequencing of both DNA strands according to standard procedures. The correct construct was transformed into *E. coli* BL21(DE3) cells for protein expression. In this construct, the *ampD* gene is inducible by isopropyl β-D-thiogalactoside (IPTG).

**Protein expression in *E. coli* and purification of AmpD.** *E. coli* BL21(DE3) cells harboring the above vector pET-24a<sup>+</sup> with the cloned *ampD* gene were grown at 37 °C in 500 mL of LB medium supplemented with kanamycin (50 µg/mL) as the selection agent. The expression of the wild-type AmpD was induced by the addition of IPTG (400 µM, final concentration), when the cell density reached an A<sub>600</sub> value of 0.7. After 4 h of induction at 30 °C, the cells were harvested by centrifugation (6,000 g, 15 min, 4 °C), washed with 150 mM NaCl (in water) and then resuspended in 35 mL of 20 mM phosphate buffer containing 1 mM dithiothreitol pH 7.0 (buffer A). Benzonase (5 units/L of culture) and Pefabloc (0.1 mg/mL in suspension) were added to the cell suspension. Cells were lysed at 4 °C by 30 cycles of sonification (30 s of burst and 20 s of rest for each cycle using a Branson sonifier). The debris was removed by centrifugation at 20,000 g for 40 min at 4 °C. The pH of the supernatant was adjusted to 7.0. Then, the supernatant was microfiltered through 0.45 µm Millipore filters and loaded onto a Q-Sepharose column (2.5 cm × 30 cm, 150 mL; Sigma) equilibrated in buffer A (supplemented with 0.05 mg/mL Pefabloc). The column was eluted with a linear NaCl gradient (720 mL) from 0 to 0.35 M in buffer A containing 0.075 mg/mL Pefabloc. The peak fractions containing AmpD (assessed by SDS-PAGE) were pooled, concentrated to 10 mL by ultrafiltration on a 5,000 Da-cutoff Amicon membrane and applied to a molecular sieve column of Sephacryl S100 HR (2.5 cm × 100 cm, 500 mL; Sigma) equilibrated in buffer A (supplemented with 0.05 mg/mL Pefabloc). The fractions containing the protein were collected and concentrated to 4 mL. The solution was added to 4 mL of 2.4 M (NH<sub>4</sub>)<sub>2</sub>SO<sub>4</sub> to make a final concentration of 1.2 M for (NH<sub>4</sub>)<sub>2</sub>SO<sub>4</sub>. The enzyme solution (8 mL total) was applied to a Source 15 ISO column (2.5 cm × 30 cm, 60 mL; GE Healthcare Life Science; hydrophobic chromatography). The desired protein was eluted with a linear gradient of 1.2 to 0 M (NH<sub>4</sub>)<sub>2</sub>SO<sub>4</sub> in buffer A. The fractions containing AmpD were collected and dialyzed against 50 mM sodium phosphate buffer, pH 7.0, and concentrated by ultrafiltration to 15~25 mg/mL. After addition of sodium azide (1 mM, final concentration), the enzyme was stored at 4 °C. The protein content from the column fractions was monitored by SDS-PAGE (Figure S1). The AmpD concentration was determined by measuring the absorbance of the solution at 280 nm and using a calculated extinction coefficient of 31,960 M<sup>-1</sup>cm<sup>-1</sup>.<sup>1</sup> Matrix-assisted laser desorption ionization (MALDI) mass spectrometric analysis revealed a molecular mass of 20 853 ± 20 Da for AmpD, in agreement with that value deduced from the gene sequence (20 847 Da) (Figure S2).

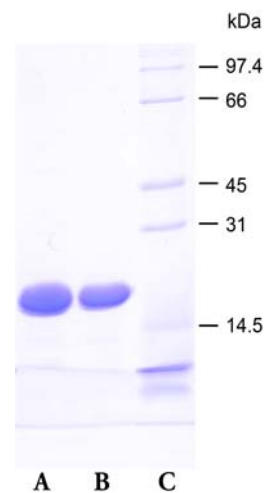

**Figure S1.** SDS-PAGE analysis of the purified AmpD, (A) 15 µg and (B) 10 µg, (C) molecular mass standards.

<sup>1</sup> Génèreux, C.; Dehareng, D.; Devreese, B.; Van Beeumen, J.; Frère, J. M.; Joris, B., *Biochem. J.* **2004**, *377*, 111-120.

**Figure S2.** MALDI mass spectrum of the purified AmpD.

---

D:\Data\MVJ\MSF\Mobashery\050409\o\_DHB\_1\0\_J8\1

---

Comment 1

Comment 2

sample "o" in DHB matrix

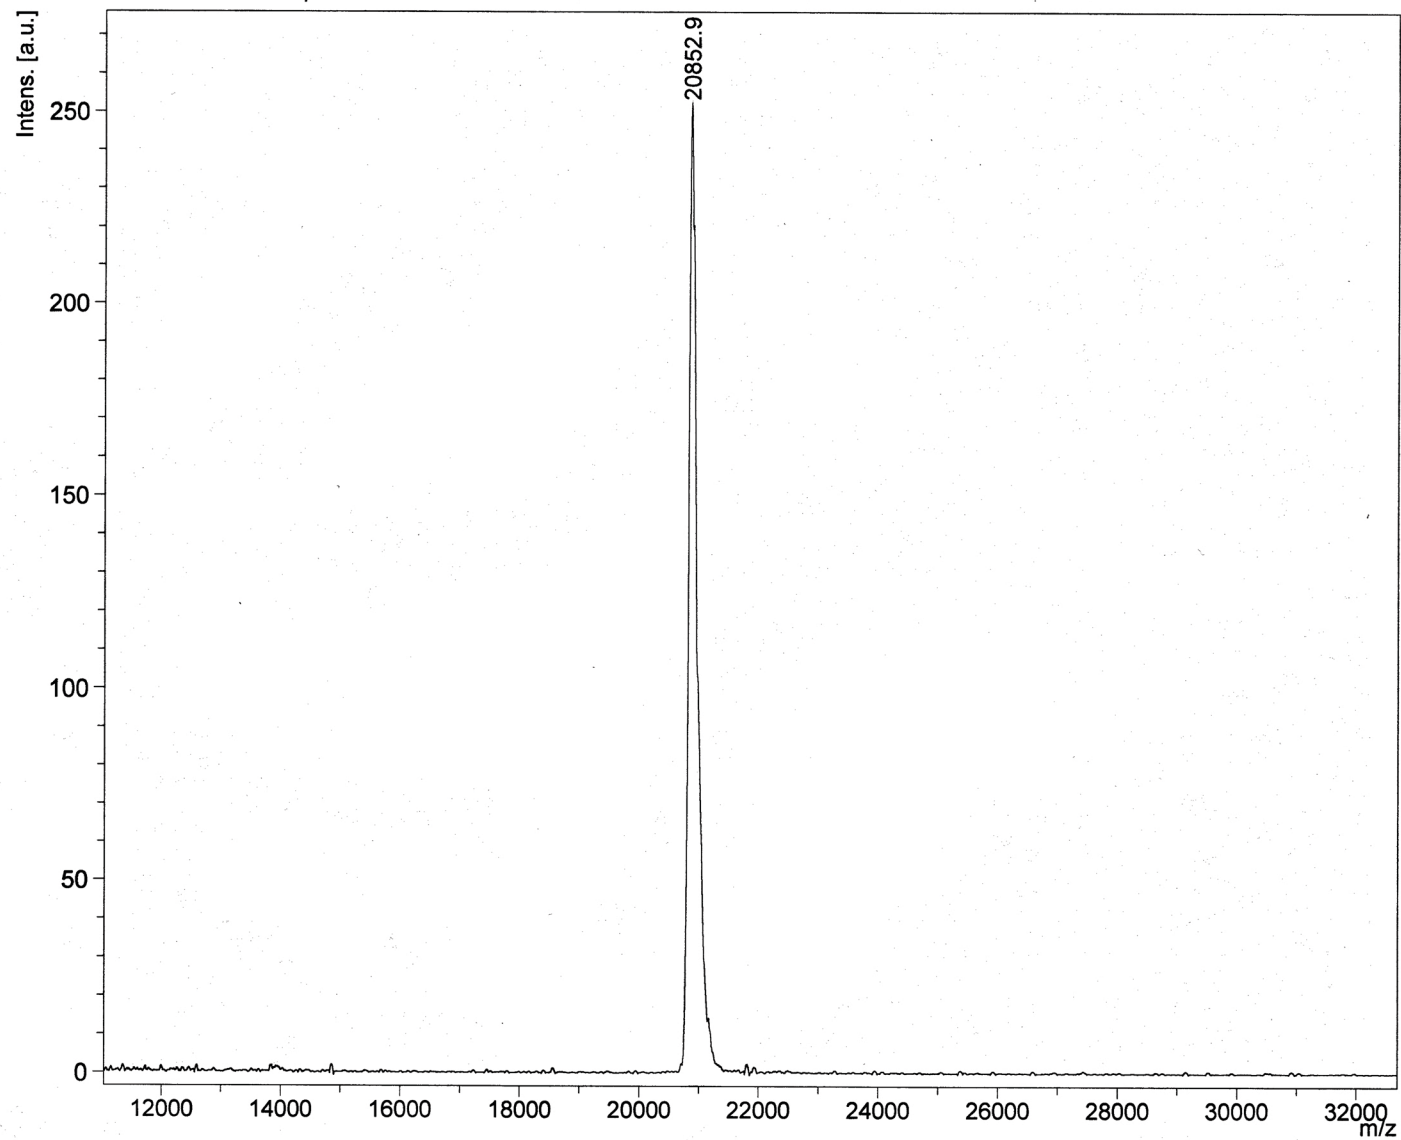

**Kinetic studies.** The assays were carried out in 20 mM sodium phosphate buffer, pH 7.0, at 25 °C with substrate concentrations ranging from 50  $\mu$ M to 3.0 mM and different enzyme concentrations — 50 nM for AnhMurNAc-tripeptide (**2a**), 100 nM for AnhMurNAc-pentapeptide (**2c**), 1.5  $\mu$ M for GluNAc-AnhMurNAc-pentapeptide (**1**), 500  $\mu$ M for **4a** and **4b**. The reaction mixtures were incubated at 25 °C for 30 min. The reactions were stopped by the addition of 2 volume of 0.075% TFA in water. The internal standard was GluNAc-MurNAc-pentapeptide (**13**). Reaction products were separated and quantified on a C18 reversed-phase HPLC column (Symmetry Shield RP18, 5  $\mu$ m, 3.9 mm  $\times$  150 mm; Waters) on a PerkinElmer series 200 System. The column was equilibrated with 0.05% trifluoroacetic acid in water and eluted with a linear acetonitrile gradient from 0 to 15% over 40 min with a flow rate of 1 mL/min. The column effluent was monitored at 205 nm. The catalytic activity of the AmpD was quantified from the rate of substrate disappearance and of tripeptide or pentapeptide appearance. The  $t_R$  for **2a** was 30.2 min, for **2c** was 34.5 min, for **1** was 36.2 min, for **4a** was 24.6 min and for **4b** was 29.5 min. HPLC chromatograms of AmpD reaction of **2a** is shown in Figure S3 as a representative example.

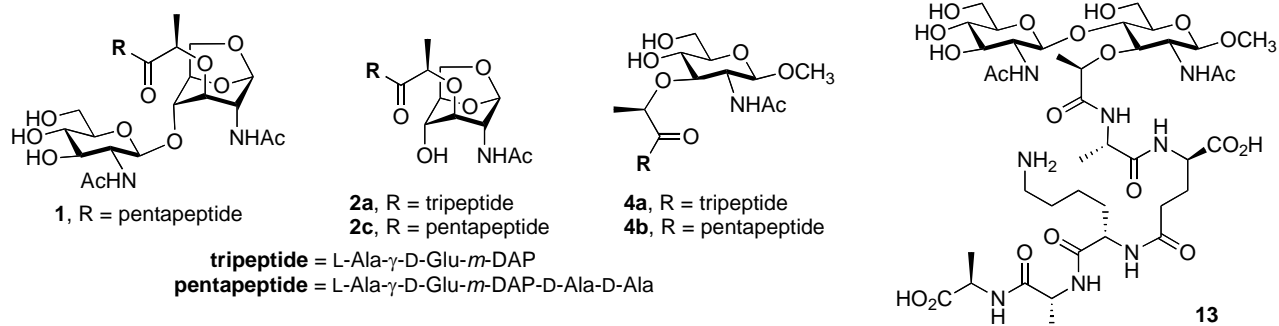

**ESI-MS.** Characterization of the reaction products was performed using a Waters Alliance 2695 Separations Module coupled with a Waters 2996 Photodiode Array detector, and Micromass Quattro-LC Triple Quadrupole electrospray ionization (ESI) mass spectrometer (Figure S4). The peaks were initially analyzed using positive ionization mode throughout the  $m/z$  of 100 – 1200. The charge states of the major ions were determined as the reciprocal of the spacing between two adjacent isotopic peaks differing in mass by 1 Da.<sup>2</sup> Analysis of the MS data and fragmentation pattern of the reaction products and of compounds **2a**, **3**, and **12a** allowed us to confirm chemical structure of the reaction products.

## Syntheses of Compounds

**General Procedures.** All organic reagents were purchased from either Sigma-Aldrich Chemical Company or Acros Organics, unless otherwise stated. All reactions were performed under an atmosphere of nitrogen unless noted otherwise. Reactions were monitored by thin-layer chromatography (TLC) carried out on Whatman reagents 0.25 mm silica gel 60-F plates that were visualized using UV light and/or aqueous cerium sulfate staining, followed by heating. Flash chromatography was carried out with silica gel 60, 230-400 mesh (0.040-0.063 mm particle size) purchased from EM Science. NMR spectra, including <sup>1</sup>H, <sup>13</sup>C, DEPT, H-H COSY, and H-C HETCOR experiments, were recorded on a Varian UnityPlus 300, or a Varian INOVA-500, or Varian DirectDrive 600 spectrometer. Proton and Carbon chemical shifts were referenced to residual solvent peaks. NMR signal assignments for synthesized compounds were performed on the basis of H-H COSY, H-C HETCOR, and DEPT experiments. High-resolution mass spectra were obtained at the Department of Chemistry and Biochemistry, University of Notre Dame via FAB ionization, using a JEOL AX505HA mass spectrometer.

Analytical high performance liquid chromatography (HPLC) was performed on Waters 2414 instrument with SunFire C18 reversed-phased column (Waters) or delta-pak C18 reversed-phased column (Waters) using a linear

<sup>2</sup> Henry, K. D.; McLafferty, F. W. *Org. Mass Spectrom.* **1990**, *25*, 490-492.

gradient of 2-15% acetonitrile in water supplemented with 0.1% TFA over 40 min at 1 mL/min. Detection of the samples was by UV at 205 nm. Preparative HPLC purifications were performed using delta-pak C18 reversed-phased column, 100 Å pore size, 19 × 300 mm.

Crystals were examined under Infineum V8512 oil and placed on a MiTeGen mount, then transferred to the 100 K N<sub>2</sub> stream of a Bruker SMART Apex CCD diffractometer. Unit cell parameters were determined from reflections with  $I > 10\sigma(I)$  harvested from three orthogonal sets of 30 0.5°  $\omega$  scans. Data collection strategy was calculated using COSMO, included in the Apex2 suite of programs<sup>3</sup> to maximize coverage of reciprocal space in a minimum amount of time. Average 4-fold redundancy of measurements was sought. Data were corrected for Lorentz and polarization effects, as well as for absorption. Structure solution and refinement utilized the programs of the SHELXTL software package.<sup>4</sup> Full details of the X-ray structure determinations are in the CIF files included as Supporting Information.

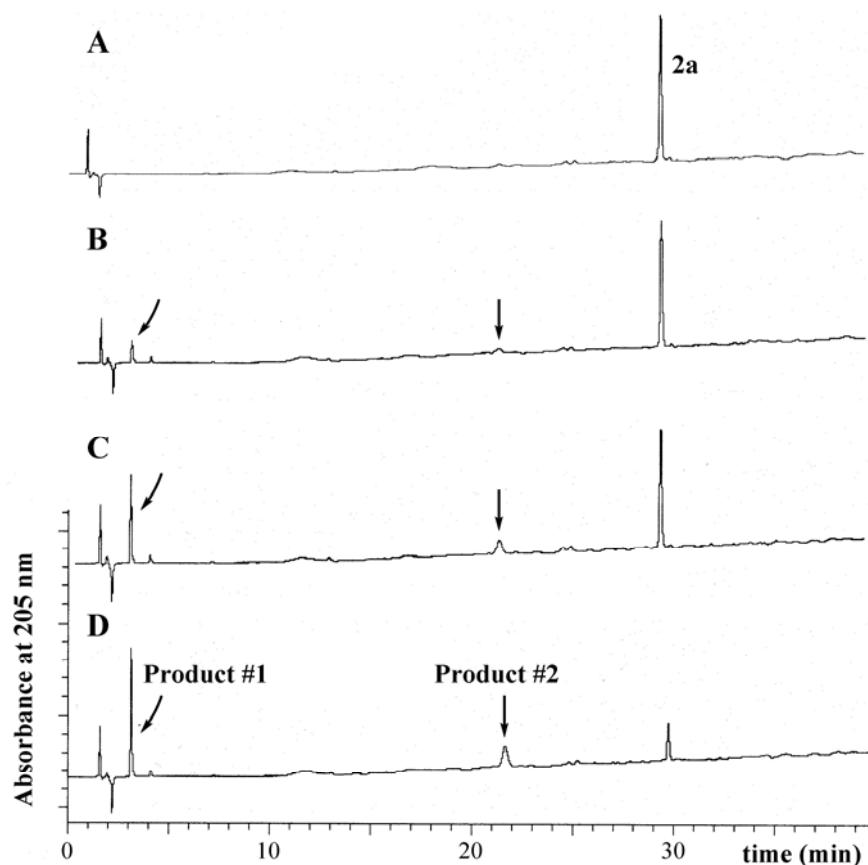

**Figure S3.** The AmpD reaction with compound **2a**. The single peak is compound **2a** at time zero (A). The time course for conversion of compound **2a** by AmpD to the two products (retention times at 3.1 and 21.5 min) were monitored at 10 min (B), 60 min (C), and 90 min (D) of incubation. The two new peaks correspond to product **1** (the tripeptide) and product **2** (anhMurNAc), whose identities were conformed by LC/MS analysis (Figure S4).

<sup>3</sup> Apex2. Bruker-AXS: Madison, WI, 2008; Vol. 58.

<sup>4</sup> Sheldrick, G. M., *Acta Crystallogr. A*. **2008**, *64*, 112-122.

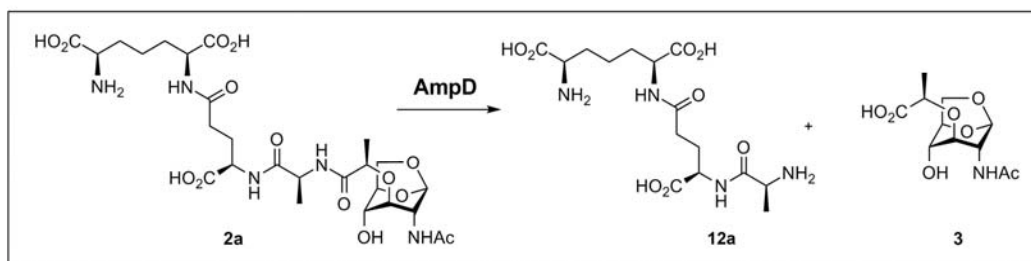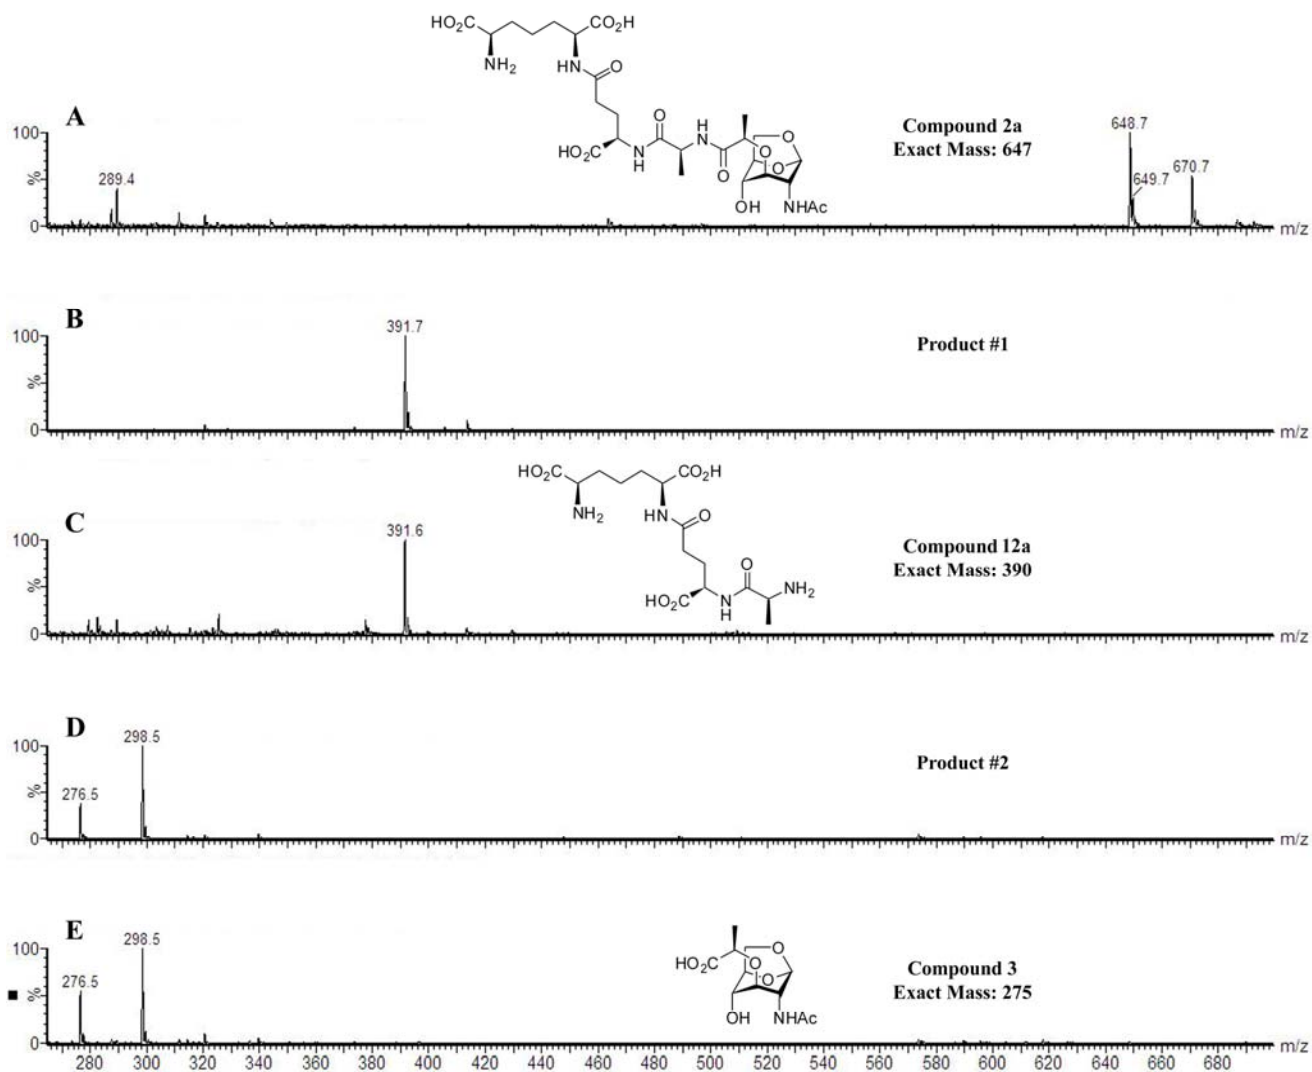

**Figure S4.** ESI-LC-MS analysis of the AmpD reaction products and comparison to authentic synthetic samples. The spectrum of the synthetic compound **2a** (A), of reaction product #1 (B), authentic compound **12a** (C), of reaction product #2 (D), and of authentic compound **3** (E).

Compounds **1**, **4a**, **4b**, and **13** were prepared according to the literature methods developed by our laboratory.<sup>5</sup> **Compound 9**. EDCI (0.18 g, 0.94 mmol) was added to a mixture of *N*-hydroxysuccinimide (0.11 g, 0.96 mmol) and **6** (0.28 g, 0.76 mmol) in CH<sub>2</sub>Cl<sub>2</sub> (5 mL) in an ice-water bath. The mixture was stirred at room temperature for 20 h. Meanwhile, the Boc-protected tripeptide (0.72 g, 0.91 mmol) in CH<sub>2</sub>Cl<sub>2</sub> (5 mL) was treated with trifluoroacetic acid (2 mL) in an ice-water bath. The temperature was gradually increased to room temperature over 1 h. The reaction mixture was evaporated to dryness under reduced pressure and the residue (**7**) was dissolved in toluene. This was followed by evaporation to dryness. The residue was dissolved in *i*Pr<sub>2</sub>NEt (0.4 mL, 2.3 mmol) and DMF (5 mL), and the solution was then added to the NHS-ester of the anhydrosugar, prepared above. The resulting mixture was stirred at room temperature for 20 h. The mixture was diluted with CH<sub>2</sub>Cl<sub>2</sub> and water was added. Layers were separated. The organic layer was dried over MgSO<sub>4</sub>, filtered, concentrated and the sample was subjected to column chromatography on silica gel (CH<sub>2</sub>Cl<sub>2</sub>/MeCN/MeOH, 10:3:0.5) to give the title compound (0.57 g, 72%). <sup>1</sup>H NMR (500 MHz, CD<sub>3</sub>OD) δ 1.29 (d, *J* = 6.8 Hz, 3H), 1.34 (d, *J* = 7.0 Hz, 3H), 1.36 - 1.45 (m, 2H), 1.60 - 1.71 (m, 2H), 1.75 - 1.84 (m, 2H), 1.95 - 2.05 (m, 1H), 2.12 - 2.21 (m, 1H), 2.29 (t, *J* = 6.9 Hz, 2H), 3.49 (d, *J* = 1.2 Hz, 1H, H-4), 3.52 (m, 1H, H-3), 3.68 (dd, *J* = 7.5, 5.7 Hz, 1H, H-6a), 3.85 (s, 1H, H-2), 4.02 (dd, *J* = 8.2, 5.2 Hz, 1H, DAP-H-6), 4.17 (q, *J* = 6.8 Hz, 1H, Lac-α-H), 4.23 (d, *J* = 7.6 Hz, 1H, H-6b), 4.30 - 4.46 (m, 3H, Ala-α-H, Glu-α-H, DAP-H-2), 4.61, 4.71 (AB, 2H, OCH<sub>2</sub>Ph), 4.67 (m, H-5), 5.08 - 5.22 (m, 6H, OCH<sub>2</sub>Ph), 5.38 (s, 1H, H-1), 7.28 - 7.40 (m, 20H); <sup>13</sup>C NMR (126 MHz, CD<sub>3</sub>OD) δ 18.5, 18.6, 22.7 (3 × q), 23.1, 28.2, 31.8, 32.7 (5 × t), 49.9 (d, C-2), 50.2 (d, Ala-α-C), 53.4 (d, DAP-C-2), 53.7 (d, Glu-α-C), 62.9 (d, DAP-C-6), 66.3 (t, C-6), 68.0, 68.4, 72.6 (4 × t, OCH<sub>2</sub>Ph), 75.4 (d, C-5), 76.9 (d, Lac-α-C), 77.6 (2d, C-3 and C-4), 101.6 (d, C-1), 129.1, 129.2, 129.3, 129.5, 129.6, 129.7, 129.7, 136.8, 137.1, 137.1, 139.2, 164.8, 171.7, 172.6, 172.7, 173.3, 174.7, 174.8, 174.9; HRMS (FAB), calcd for C<sub>54</sub>H<sub>64</sub>N<sub>7</sub>O<sub>14</sub> (M+H<sup>+</sup>), 1034.4511, found 1034.4525.

**1,6-Anhydro-β-D-N-acetylmuramyl-L-Ala-γ-D-Glu-meso-DAP (2a)**. Compound **9** (0.50 g, 0.43 mmol) was dissolved in MeOH (5 mL) and stirred in the presence of 10% Pd/C (0.1 g) under an atmosphere of hydrogen at 50 °C for 3 h. The reaction mixture was filtered through a layer of Celite and the residue was washed with MeOH. The combined filtrate was concentrated to dryness under reduced pressure. The crude product was subjected to HPLC purification to afford compound **2a** (0.18 g, 66%). Preparative HPLC purifications were performed on delta-pak C18 reversed-phased column, 100 Å pore size, 19 × 300 mm using a linear gradient of 5-15% acetonitrile in water supplemented with 0.1% TFA over 0.5 h. <sup>1</sup>H NMR (600 MHz, D<sub>2</sub>O) δ 1.30 (d, *J* = 6.1 Hz, 3H), 1.35 (d, *J* = 5.6 Hz, 3H), 1.56 - 2.12 (m, 7H), 1.91 - 1.93 (m, 3H), 1.94 - 1.98 (m, 3H), 2.15 - 2.36 (m, 3H), 3.35 (br.s., 1H, H-3), 3.66 (m, 1H), 3.73 (t, *J* = 6.2 Hz, 1H, H-6a), 3.84 (br.s., 1H, H-2), 3.80 (br.s., 1H, H-4), 4.04 - 4.16 (m, 3H), 4.19 (d, *J* = 7.3 Hz, 1H, H-6b), 4.31 (br.s., 1H), 4.60 (d, *J* = 4.2 Hz, 1H, H-5), 5.40 (s, 1H, H-1); <sup>13</sup>C NMR (151 MHz, D<sub>2</sub>O) δ 17.2, 18.1, 21.9 (3 × q), 21.2, 27.7, 30.2, 31.1, 32.0 (5 × t), 49.5 (d, C-2), 49.5 (d), 65.3 (t, C-6), 68.2 (d, C-4), 76.0 (d, C-5, Lac-α-C), 78.5 (d, C-3), 100.0 (d, C-1); HRMS (FAB), calcd for C<sub>26</sub>H<sub>42</sub>N<sub>5</sub>O<sub>14</sub> (M+H<sup>+</sup>), 648.2728, found 648.2719.

**1,6-Anhydro-β-D-N-acetylmuramyl-L-Ala-γ-D-Glu-meso-DAP-D-Ala-D-Ala (2c)**. This material was prepared in the same manner as described for **2a**, with the exception that pentapeptide **8** was used in place of **7**. **Compound 10**. <sup>1</sup>H NMR (600 MHz, CD<sub>3</sub>CN) δ 1.29 (d, *J* = 7.0 Hz, 3H), 1.32 (d, *J* = 6.7 Hz, 3H), 1.34 (d, *J* = 7.3 Hz, 3H), 1.34 - 2.00 (m, 7H), 1.37 (d, *J* = 7.3 Hz, 3H), 1.89 (s, 3H), 2.15 - 2.27 (m, 3H), 3.48 (s, 1H, H-4), 3.55 (s, 1H, H-3), 3.71 (dd, *J* = 7.6, 6.2 Hz, 1H, H-6a), 3.91 (d, *J* = 8.8 Hz, 1H, H-2), 4.06 (dd, *J* = 8.7, 4.8 Hz, 1H, DAP-H-6), 4.07 - 4.11 (m, 1H), 4.13 (q, *J* = 6.9 Hz, 1H, Lac-α-H), 4.16 (d, *J* = 7.6 Hz, 1H, H-6b), 4.27 - 4.43 (m, 4H), 4.64, 4.68 (AB, *J* = 12.0 Hz, 2H, OCH<sub>2</sub>Ph), 4.69 (br. s., 1H, H-5), 5.07 - 5.15 (m, 4H, OCH<sub>2</sub>Ph), 5.21 (s, 2H, OCH<sub>2</sub>Ph), 5.39 (s, 1H, H-1), 6.55 (d, *J* = 8.8 Hz, 1H, NH), 7.31 - 7.44 (m, 20H), 7.52 (t, *J* = 7.6 Hz, 1H, NH), 7.90 (d, *J* = 6.5 Hz, 1H, NH); <sup>13</sup>C NMR (151 MHz, CD<sub>3</sub>CN) δ 17.6, 17.9, 18.0, 18.6, 23.1 (5 × q), 22.9, 27.7, 31.7, 32.1 (5 × t), 49.3 (d, C-2), 49.3, 49.8, 50.6 (3 × d, Ala-α-C), 52.1 (d, Glu-α-C), 55.4 (d, DAP-C-2),

<sup>5</sup> Heseck, D.; Lee, M.; Zhang, W.; Noll, B. C.; Mobashery, S., *J. Am. Chem. Soc.* **2009**, *131*, 5187-5193; Heseck, D.; Suvorov, M.; Morio, K.; Lee, M.; Brown, S.; Vakulenko, S. B.; Mobashery, S., *J. Org. Chem.* **2004**, *69*, 778-784.

62.7 (d, DAP-C-6), 66.0 (t, C-6), 67.3, 67.6, 68.1, 72.1 (4 × t, OCH<sub>2</sub>Ph), 75.1 (d, C-5), 76.6 (d, Lac-α-C), 77.0 (d, C-4), 77.4 (d, C-3), 101.4 (d, C-1), 128.8, 128.9, 129.0, 129.1, 129.2, 129.4, 129.5, 129.6, 136.7, 137.0, 137.2, 139.2, 170.7, 171.4, 172.3, 173.2, 173.2, 173.5, 173.8, 174.0, 174.4; HRMS (FAB), calcd for C<sub>60</sub>H<sub>73</sub>N<sub>9</sub>O<sub>16</sub> (M<sup>+</sup>), 1176.5254, found 1176.5288.

**Compound 2c.** <sup>1</sup>H NMR (600 MHz, CD<sub>3</sub>OD) δ 1.39 (d, *J* = 6.5 Hz, 3H), 1.39 (d, *J* = 7.0 Hz, 3H), 1.42 (d, *J* = 7.3 Hz, 3H), 1.44 (d, *J* = 7.3 Hz, 3H), 1.51 - 2.03 (m, 7H), 1.99 (s, 3H), 2.22 - 2.39 (m, 3H), 3.42 (s, 1H, H-3), 3.72 (s, 1H, H-4), 3.76 (dd, *J* = 7.3, 5.6 Hz, 1H, H-6a), 3.88 (s, 1H, H-2), 4.01 (t, *J* = 6.0 Hz, 1H), 4.21 (q, *J* = 6.7 Hz, 1H, Lac-α-H), 4.24 - 4.27 (m, 1H), 4.28 (d, *J* = 7.3 Hz, 1H, H-6b), 4.33 - 4.45 (m, 4H), 4.59 (d, *J* = 5.0 Hz, 1H, H-5), 5.40 (s, 1H, H-1); <sup>13</sup>C NMR (126 MHz, CD<sub>3</sub>OD) δ 17.7, 18.0, 18.3, 18.7, 22.8 (5 × q), 22.6, 28.5, 31.2, 32.2, 32.7 (5 × t), 50.0 (d, C-2), 49.5, 50.6, 50.9 (3 × d, Ala-α-C), 52.7 (d, Glu-α-C), 53.9, 55.4 (2 × d, DAP-C-2, DAP-C-6), 66.4 (t, C-6), 70.8 (d, C-4), 77.1 (d, Lac-α-C), 77.7 (d, C-5), 81.0 (d, C-3), 101.9 (d, C-1), 171.9, 173.1, 174.4, 174.6, 174.8, 175.1, 175.3, 175.7, 175.9; HRMS (FAB), calcd for C<sub>32</sub>H<sub>52</sub>N<sub>7</sub>O<sub>16</sub> (M+H<sup>+</sup>), 790.3471, found 790.3455.

**2-Acetamido-1,6-anhydro-4-O-benzyl-2-deoxy-3-O-[(1R)-1-(methoxycarbonyl)ethyl]-β-D-glucopyranose (11).** Compound **3** (0.28 g, 1.0 mmol) in anhydrous MeOH (2 mL) was stirred in the presence of AcOH (2 mL) at 60 °C for 10 h. The resulting mixture was concentrated to dryness. Crystals were grown from mixed solvents of hexanes and Et<sub>2</sub>O and used for determination of X-ray crystal structure. <sup>1</sup>H NMR (500 MHz, CDCl<sub>3</sub>) δ 1.42 (d, *J* = 7.0 Hz, 3H), 2.06 (s, 3H), 3.43 (s, 1H), 3.48 (s, 3H), 3.73 (d, *J* = 3.2 Hz, 2H), 3.75 (s, 3H), 4.09 (d, *J* = 8.4 Hz, 1H), 4.19 (d, *J* = 7.2 Hz, 1H), 4.31 (q, *J* = 6.9 Hz, 1H), 4.54 (d, *J* = 5.2 Hz, 1H), 5.36 (s, 1H), 6.91 (d, *J* = 8.4 Hz, 1H); <sup>13</sup>C NMR (126 MHz, CDCl<sub>3</sub>) δ 18.3 (q), 22.9 (q), 50.5 (d), 52.2 (q, OCH<sub>3</sub>), 65.4 (t, C-6), 70.1 (d), 74.2 (d), 76.4 (d), 78.1 (d), 95.9 (d), 100.8 (d), 170.6, 173.5.

**L-Ala-γ-D-Glu-meso-DAP (12a).** This material was prepared in the same manner as described for **2a**, with the exception that the tripeptide **7** was used in place of **9**. <sup>1</sup>H NMR (300 MHz, D<sub>2</sub>O) δ 1.46 - 2.30 (m, 8H), 1.56 (d, *J* = 7.2 Hz, 3H), 2.38 - 2.49 (m, 2H), 3.90 (t, *J* = 5.9 Hz, 1H), 4.13 (q, *J* = 7.0 Hz, 1H), 4.37 (m, 2H); <sup>13</sup>C NMR (126 MHz, D<sub>2</sub>O) δ 17.1, 20.9, 21.4, 27.1, 30.1, 30.6, 31.9, 49.6, 53.2, 53.2, 54.2, 171.3, 173.9, 175.5, 175.8, 176.4, 177.2; HRMS (FAB), calcd for C<sub>15</sub>H<sub>27</sub>N<sub>4</sub>O<sub>8</sub> (M+H<sup>+</sup>), 391.1829, found 391.1839.

**X-ray structures of compounds 11.** Crystals of compound **11** was obtained and their X-ray crystal structure were determined to confirm the structure of 1,6-anhydromuramic acid. Compound **11** keeps a typical anhydropyranose structure, where all substituents are in axial positions. Two-H bonds were present in compound **11**. The O4 atom engages two H-bonds. One is the intramolecular H-bond between N1–H1N–O4 and the other is the intermolecular H-bond between O4–H4O–O8. Detailed information on H-bonds is given in Table S2. Structural details are given in Figures S5 and S6.



**Table S1.** Crystallographic Details of Compound **11**.

| <b>11</b>                                                      |                                                 |
|----------------------------------------------------------------|-------------------------------------------------|
| chemical formula                                               | C <sub>12</sub> H <sub>19</sub> NO <sub>7</sub> |
| formula weight                                                 | 289.28                                          |
| space group                                                    | <i>P</i> 2 <sub>1</sub>                         |
| <i>a</i> (Å)                                                   | 6.3338(1)                                       |
| <i>b</i> (Å)                                                   | 15.4559(3)                                      |
| <i>c</i> (Å)                                                   | 7.2741(2)                                       |
| α (°)                                                          | 90.00                                           |
| β (°)                                                          | 108.775(1)                                      |
| γ (°)                                                          | 90.00                                           |
| <i>V</i> Å <sup>3</sup>                                        | 674.20(3)                                       |
| <i>Z</i>                                                       | 2                                               |
| <i>T</i> (°C)                                                  | 100(2)                                          |
| λ (Å)                                                          | 1.54178                                         |
| D <sub>obsd</sub> (g cm <sup>-3</sup> )                        | 1.425                                           |
| μ (cm <sup>-1</sup> )                                          | 1.006                                           |
| <i>R</i> 1( <i>F</i> <sup>2</sup> , <i>I</i> > 2σ( <i>I</i> )) | 0.0264                                          |
| <i>wR</i> 2( <i>F</i> <sup>2</sup> )                           | 0.0684                                          |
| <i>S</i>                                                       | 1.060                                           |

$$wR2 = \sqrt{\frac{\sum [w(F_o^2 - F_c^2)^2]}{\sum [w(F_o^2)^2]}}; R1 = \frac{\sum ||F_o| - |F_c||}{\sum |F_o|}; GooF = S = \sqrt{\frac{\sum [w(F_o^2 - F_c^2)^2]}{(n-p)}}$$

*n*= number of reflections, *p*= number of parameters refined

**Table S2.** Hydrogen-bond geometry of compound **11**.

| <i>D</i> -H... <i>A</i>   | <i>D</i> -H (Å) | H... <i>A</i> (Å) | <i>D</i> ... <i>A</i> (Å) | <i>D</i> -H ... <i>A</i> (°) |
|---------------------------|-----------------|-------------------|---------------------------|------------------------------|
| N1-H1N...O4 <sup>i</sup>  | 0.83(2)         | 2.54(2)           | 3.0638(17)                | 122.7(10)                    |
| O4-H4O...O8 <sup>ii</sup> | 0.840           | 1.914             | 2.7035(16)                | 156                          |

\*symmetry codes: (i) *x*, *y*, *z*; (ii) *x*-1, *y*, *z*-1.

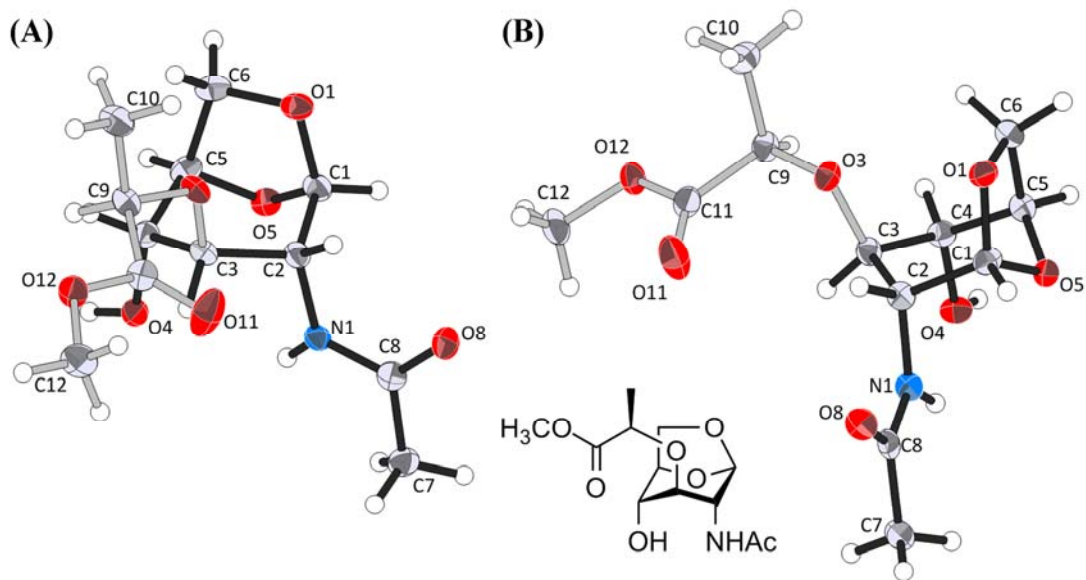

**Figure S5.** (A) The molecular structure of compound **11**, showing the atom-numbering scheme. The ORTEP diagram is shown at 50% probability level. Bonds of lactate side chain at C-3 are shown in gray, while other bonds in anhydrosugar backbone are shown in black. Hydrogen atoms are shown as small spheres of arbitrary radii. (B) An alternative view.

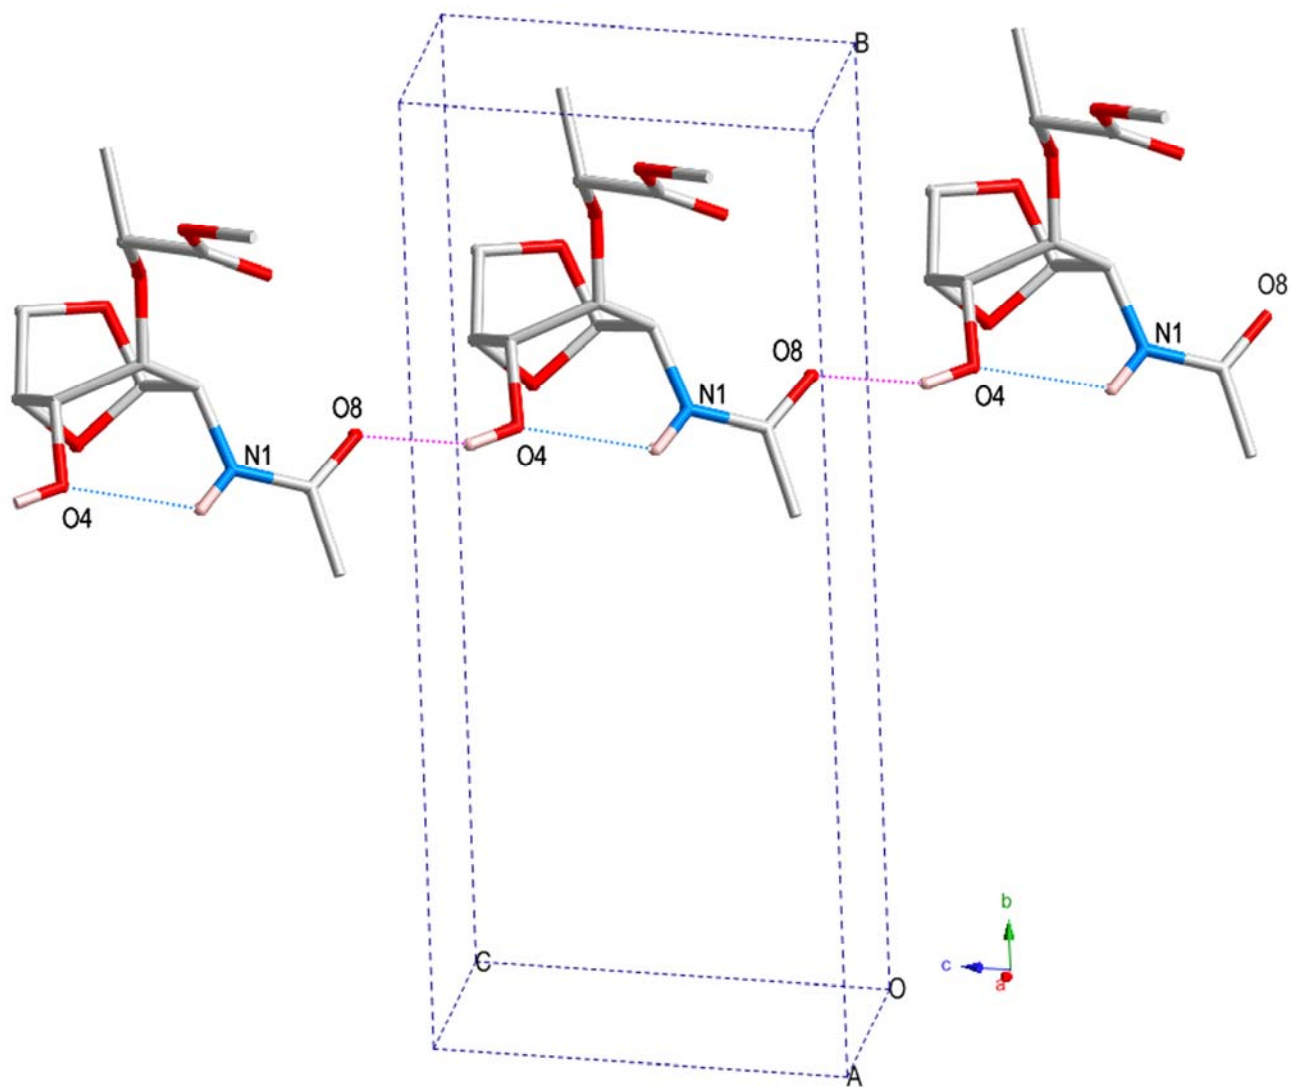

**Figure S6.** Two-H bonds in compound **11** are shown in dotted lines. One is the intramolecular H-bond between N1–H1N–O4 (blue) and the other is the intermolecular H-bond between O4–H4O–O8 (pink). A unit cell is shown in dotted lines (dark blue).

DHL-35

exp3 s2pu1

|             |             |            |             |
|-------------|-------------|------------|-------------|
| SAMPLE      |             | DEC. & VT  |             |
| date        | Oct 20 2007 | dfrq       | 499.866     |
| solvent     | CD30D       | dn         | H1          |
| file        | exp         | dpwr       | 30          |
| ACQUISITION |             | dof        | 0           |
| sfrq        | 499.866     | dm         | nnn         |
| tn          | H1          | dmm        | c           |
| at          | 5.016       | dmf        | 200         |
| np          | 65536       | dseq       |             |
| sw          | 6533.3      | dres       | 1.0         |
| fb          | 4000        | homo       | n           |
| bs          | 4           | DEC2       |             |
| tpwr        | 61          | dfrq2      | 0           |
| pw          | 13.5        | dn2        |             |
| d1          | 0.100       | dpwr2      | 1           |
| tof         | 269.9       | dof2       | 0           |
| nt          | 32          | dm2        | n           |
| ct          | 32          | dmm2       | c           |
| alock       | n           | dmf2       | 200         |
| gain        | not used    | dseq2      |             |
| FLAGS       |             | dres2      | 1.0         |
| il          | n           | homo2      | n           |
| in          | n           | DEC3       |             |
| dp          | y           | dfrq3      | 0           |
| hs          | nn          | dn3        |             |
| DISPLAY     |             | dpwr3      | 1           |
| sp          | 464.5       | dof3       | 0           |
| wp          | 5039.1      | dm3        | n           |
| vs          | 343         | dmm3       | c           |
| sc          | 0           | dmf3       | 200         |
| wc          | 250         | dseq3      |             |
| hzmm        | 20.16       | dres3      | 1.0         |
| is          | 200.00      | homo3      | i           |
|             |             | PROCESSING |             |
| rfl         | 2922.9      | wtfile     |             |
| rff         | 2434.3      | proc       | f           |
| th          |             | fn         | 6553        |
| ins         | 4.000       | math       |             |
| ai          | ph          |            |             |
|             |             | werr       |             |
|             |             | wexp       | process p11 |
|             |             | wbs        |             |
|             |             | wnt        | wf          |

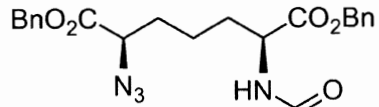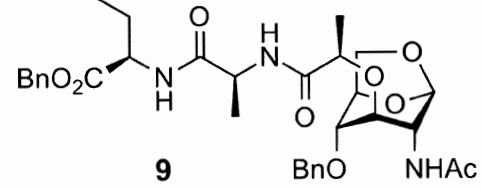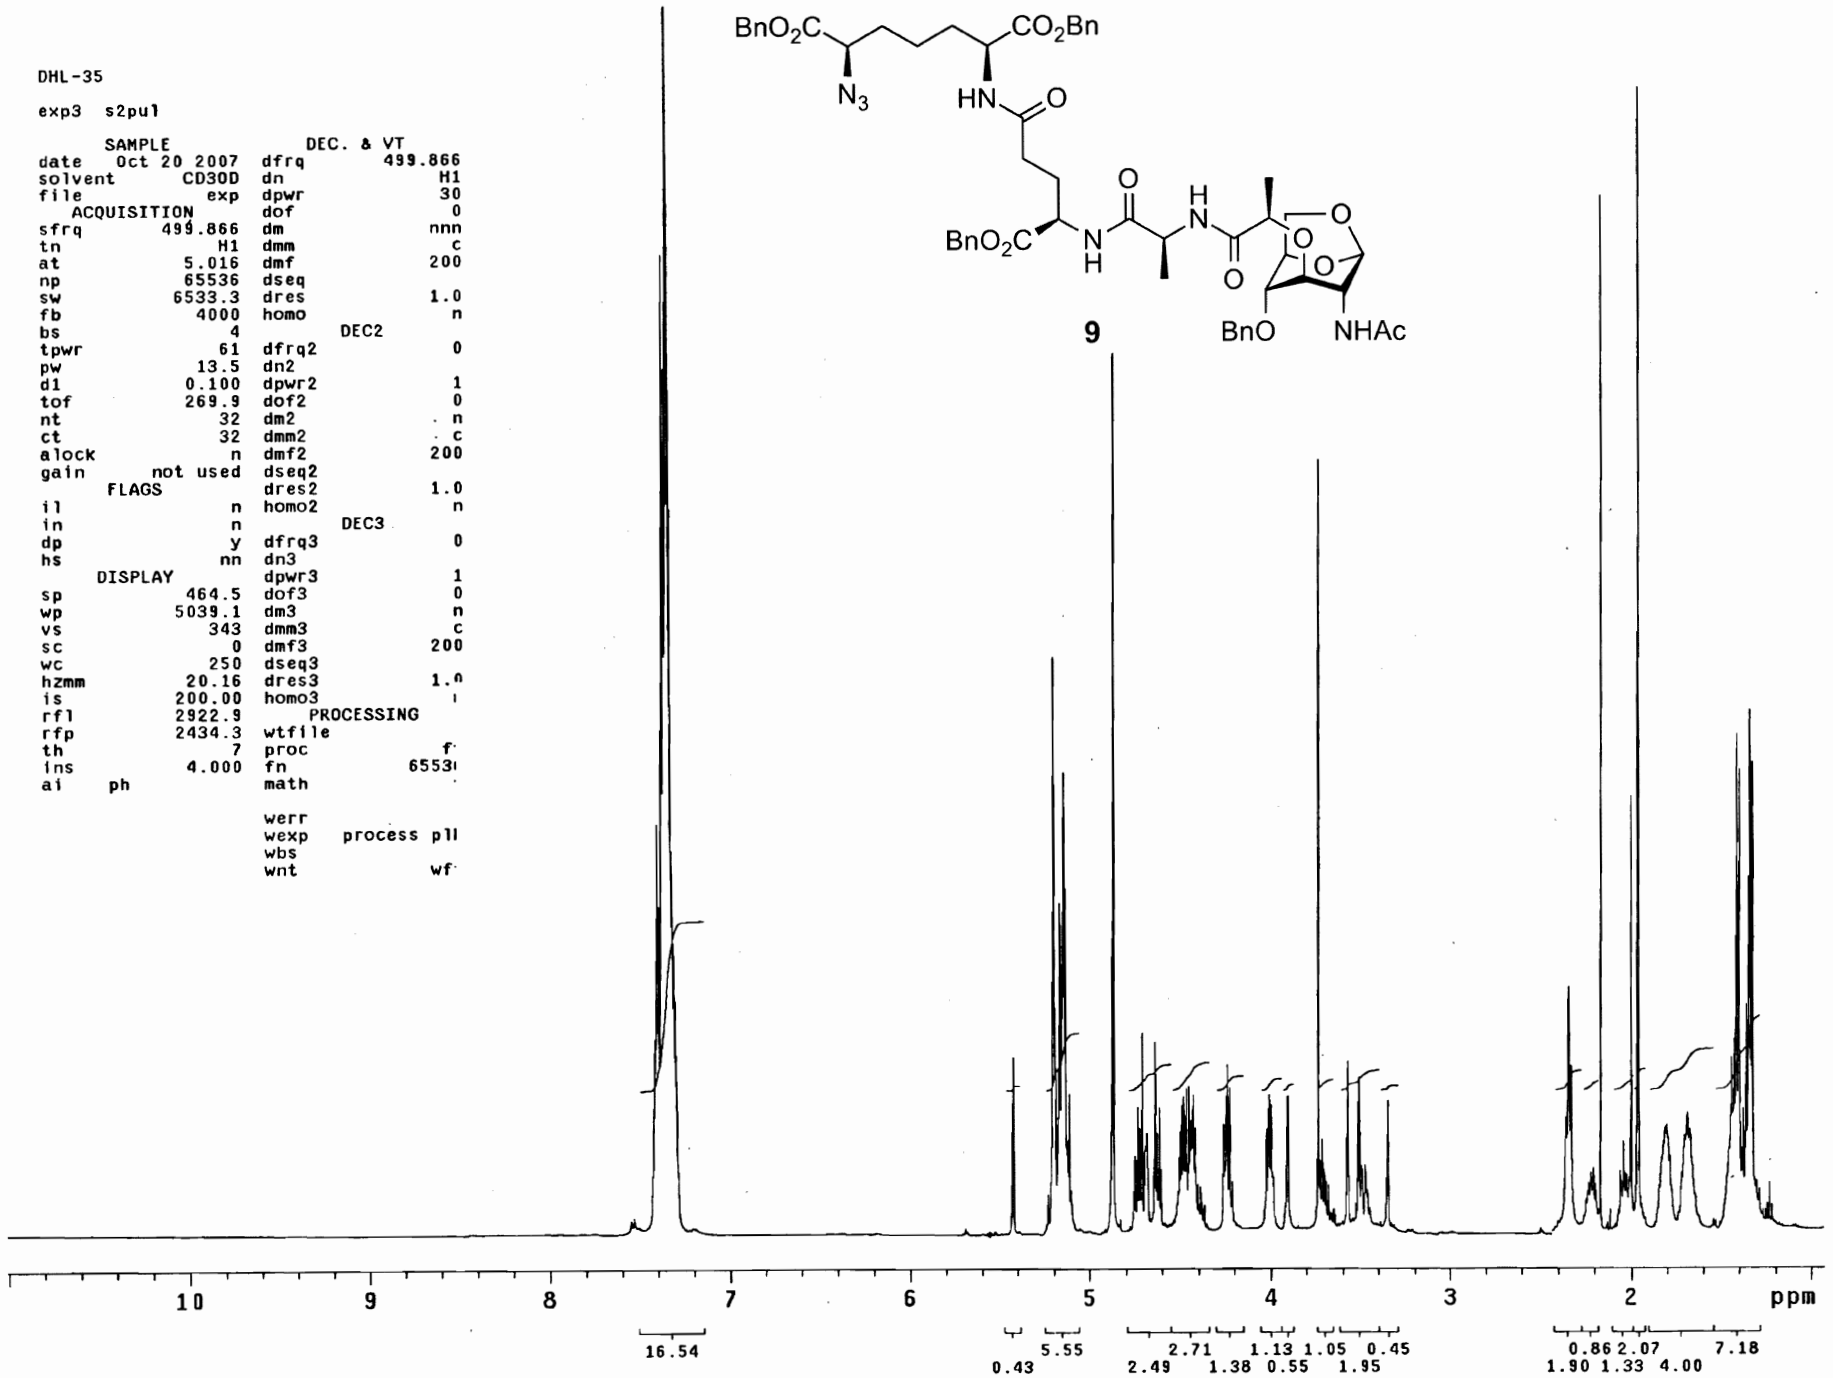

DHL-35

exp2 s2pu1

```
SAMPLE      DEC. & VT
date Oct 20 2007 dfrq 499.866
solvent cd3od dn H1
file exp dpwr 40
ACQUISITION dof 0
sfrq 125.703 dm yyy
tn C13 dmm w
at 1.215 dmf 8787.35
np 65536 dseq
sw 26963.3 dres 1.0
fb 15000 homo n
bs 4
tpwr 52 dfrq2 DEC2 0
pw 10.2 dn2
d1 1.800 dpwr2 1
tof 144.5 dof2 0
nt 1200 dm2 n
ct 252 dmm2 c
alock n dmf2 10000
gain not used dseq2 1.0
          FLAGS dres2 n
          il n homo2 DEC3 0
          in n
          dp y dfrq3 0
          hs nn dn3
DISPLAY dpwr3 1
          sp 1895.6 dof3 0
          wp 23348.9 dm3 n
          vs 164 dmm3 c
          sc 0 dmf3 10000
          wc 250 dseq3 1.0
          hzmm 93.40 dres3 n
          is 500.00 homo3
          rfl 7435.7 lb PROCESSING 1.00
          rfp 6177.7 wtfile ft
          th 6 proc 131072
          ins 100.000 fn f
          ai cdc ph math
```

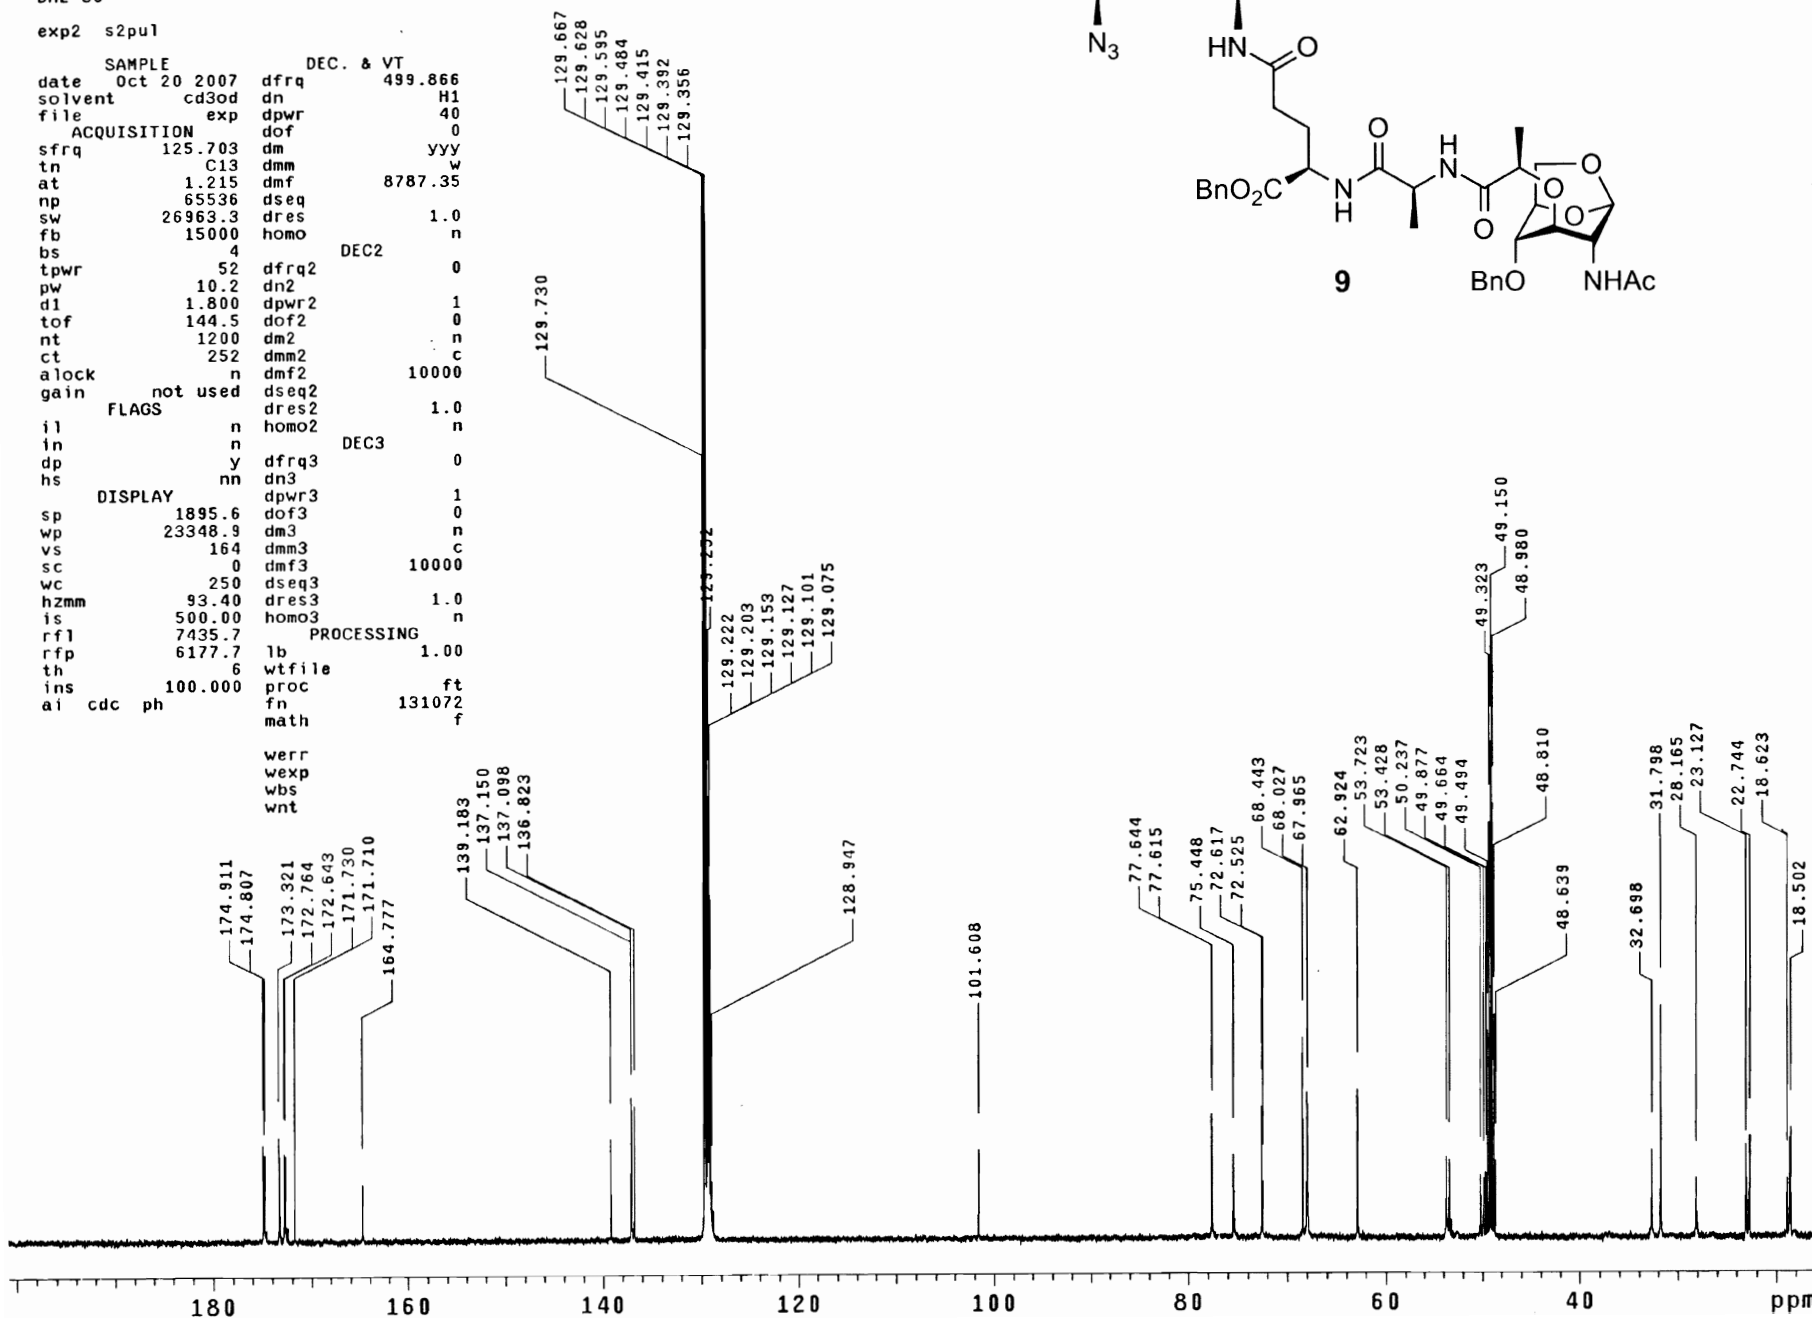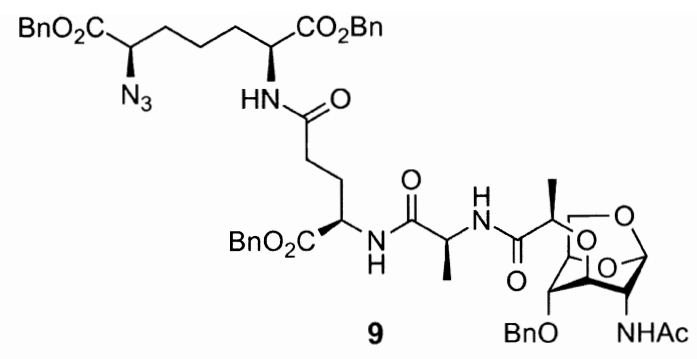

DHL-35

Pulse Sequence: relayh

Solvent: cd3od

Ambient temperature

INOVA-500 "nmr2a.chem.nd.edu"

Relax. delay 1.300 sec

COSY 90-90

Acq. time 0.149 sec

Width 3435.5 Hz

2D Width 3435.5 Hz

8 repetitions

516 increments

OBSERVE H1, 499.8631218 MHz

DATA PROCESSING

Sine bell 0.075 sec

F1 DATA PROCESSING

Sine bell 0.037 sec

FT size 1024 x 1024

Total time 1 hr, 45 min, 45 sec

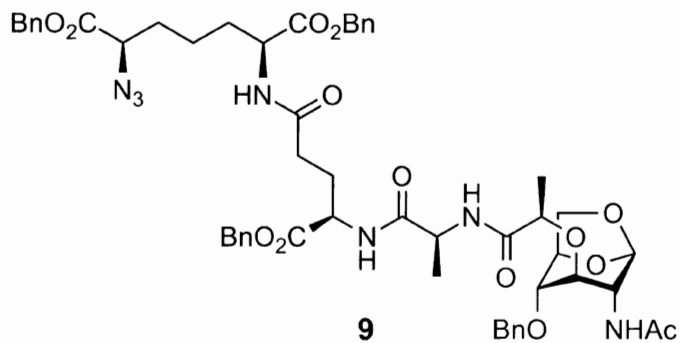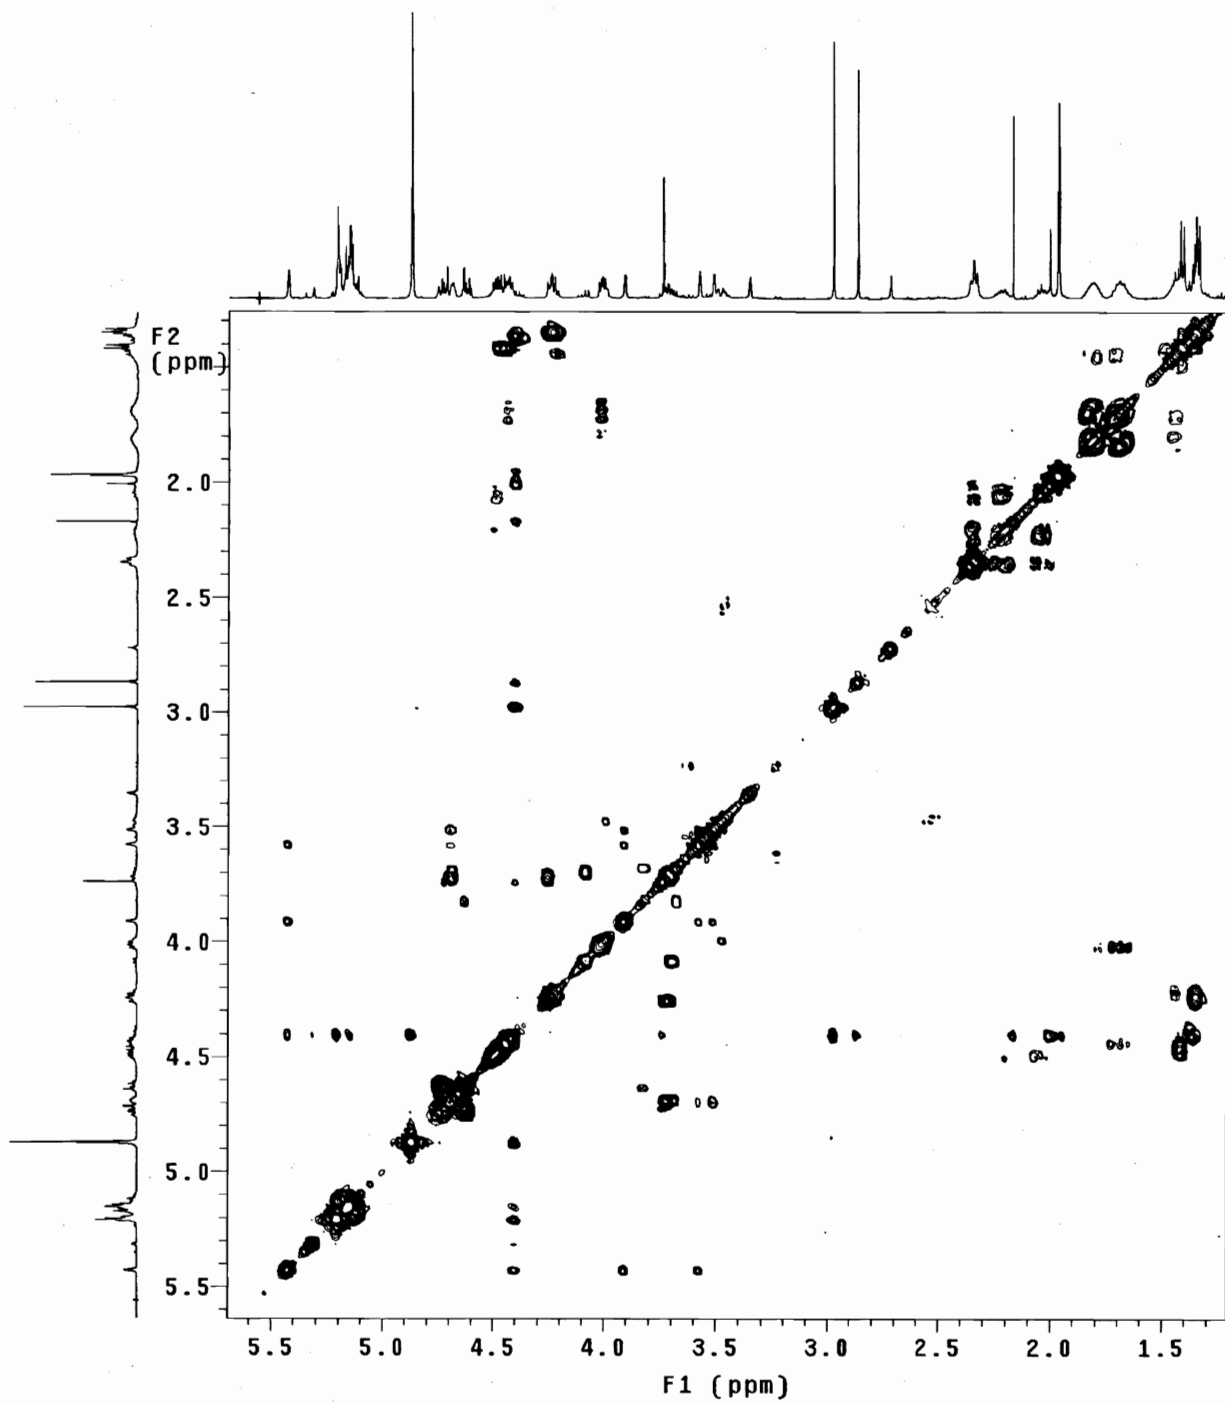

DHL-35

Pulse Sequence: relayh

Solvent: cd3od

Ambient temperature

INOVA-500 "nmr2a.chem.nd.edu"

Relax. delay 1.300 sec

COSY 90-90

Acq. time 0.149 sec

Width 3435.5 Hz

2D Width 3435.5 Hz

8 repetitions

516 increments

OBSERVE H1, 499.8631218 MHz

DATA PROCESSING

Sine bell 0.075 sec

F1 DATA PROCESSING

Sine bell 0.037 sec

FT size 1024 x 1024

Total time 1 hr, 45 min, 45 sec

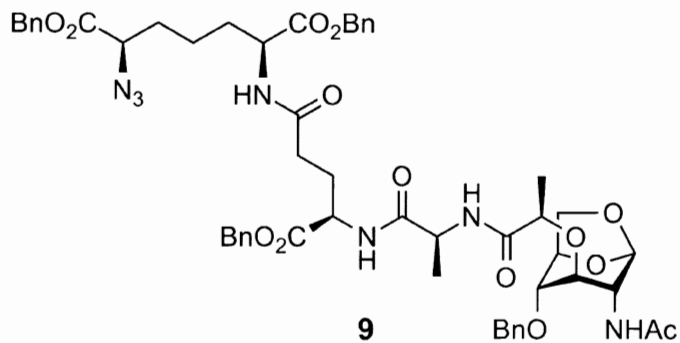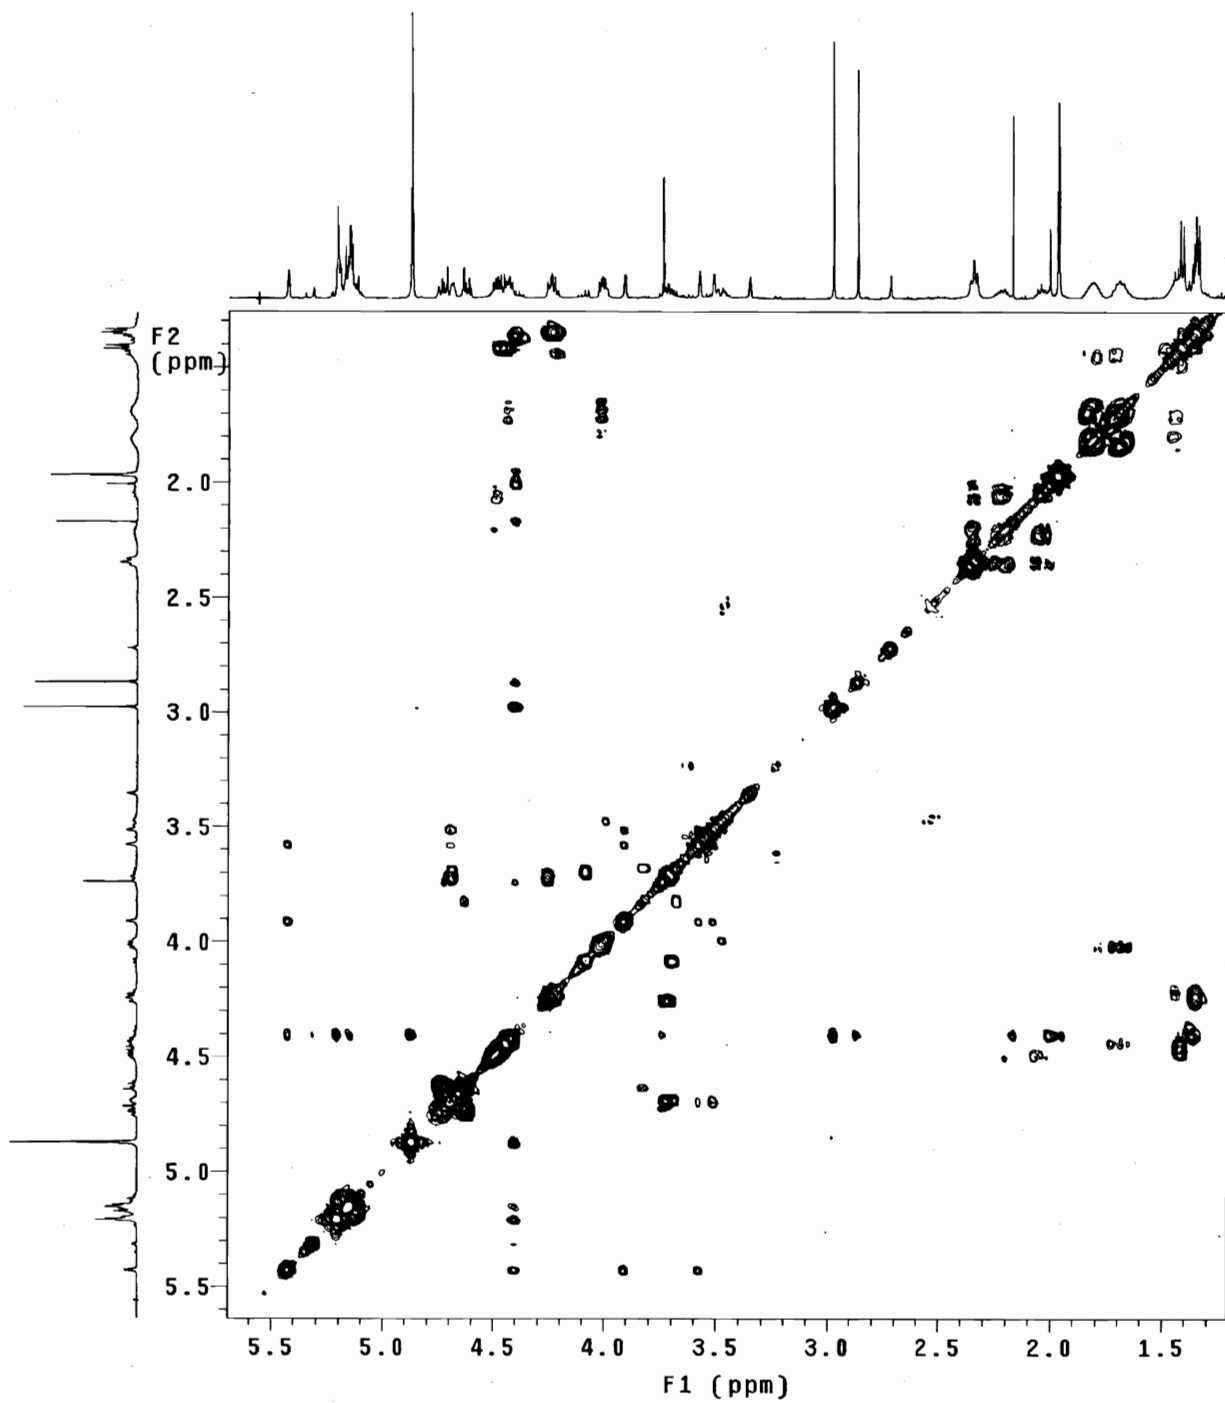

DHL-35

exp2 s2pu1

```
SAMPLE DEC. & VT
date Oct 20 2007 dfrq 499.866
solvent cd3od dn H1
file exp dpwr 40
ACQUISITION dof 0
sfrq 125.703 dm yyy
tn C13 dmm w
at 1.215 dmf 8787.35
np 65536 dseq
sw 26963.3 dres 1.0
fb 15000 homo n
bs 4 DEC2
tpwr 52 dfrq2 0
pw 10.2 dn2
d1 1.800 dpwr2 1
tof 144.5 dof2 0
nt 1200 dm2 n
ct 252 dmm2 c
alock n dmf2 10000
gain not used dseq2
FLAGS dres2 1.0
il n homo2 n
in n DEC3
dp y dfrq3 0
hs nn dn3
DISPLAY dpwr3 1
sp 1895.6 dof3 0
wp 23348.9 dm3 n
vs 164 dmm3 c
sc 0 dmf3 10000
wc 250 dseq3
hzmm 93.40 dres3 1.0
ls 500.00 homo3 n
rf1 7435.7 PROCESSING
rfp 6177.7 lb 1.00
th 6 wtfile
ins 100.000 proc ft
ai cdc ph fn 131072
math f
```

werr  
wexp  
wbs  
wnt

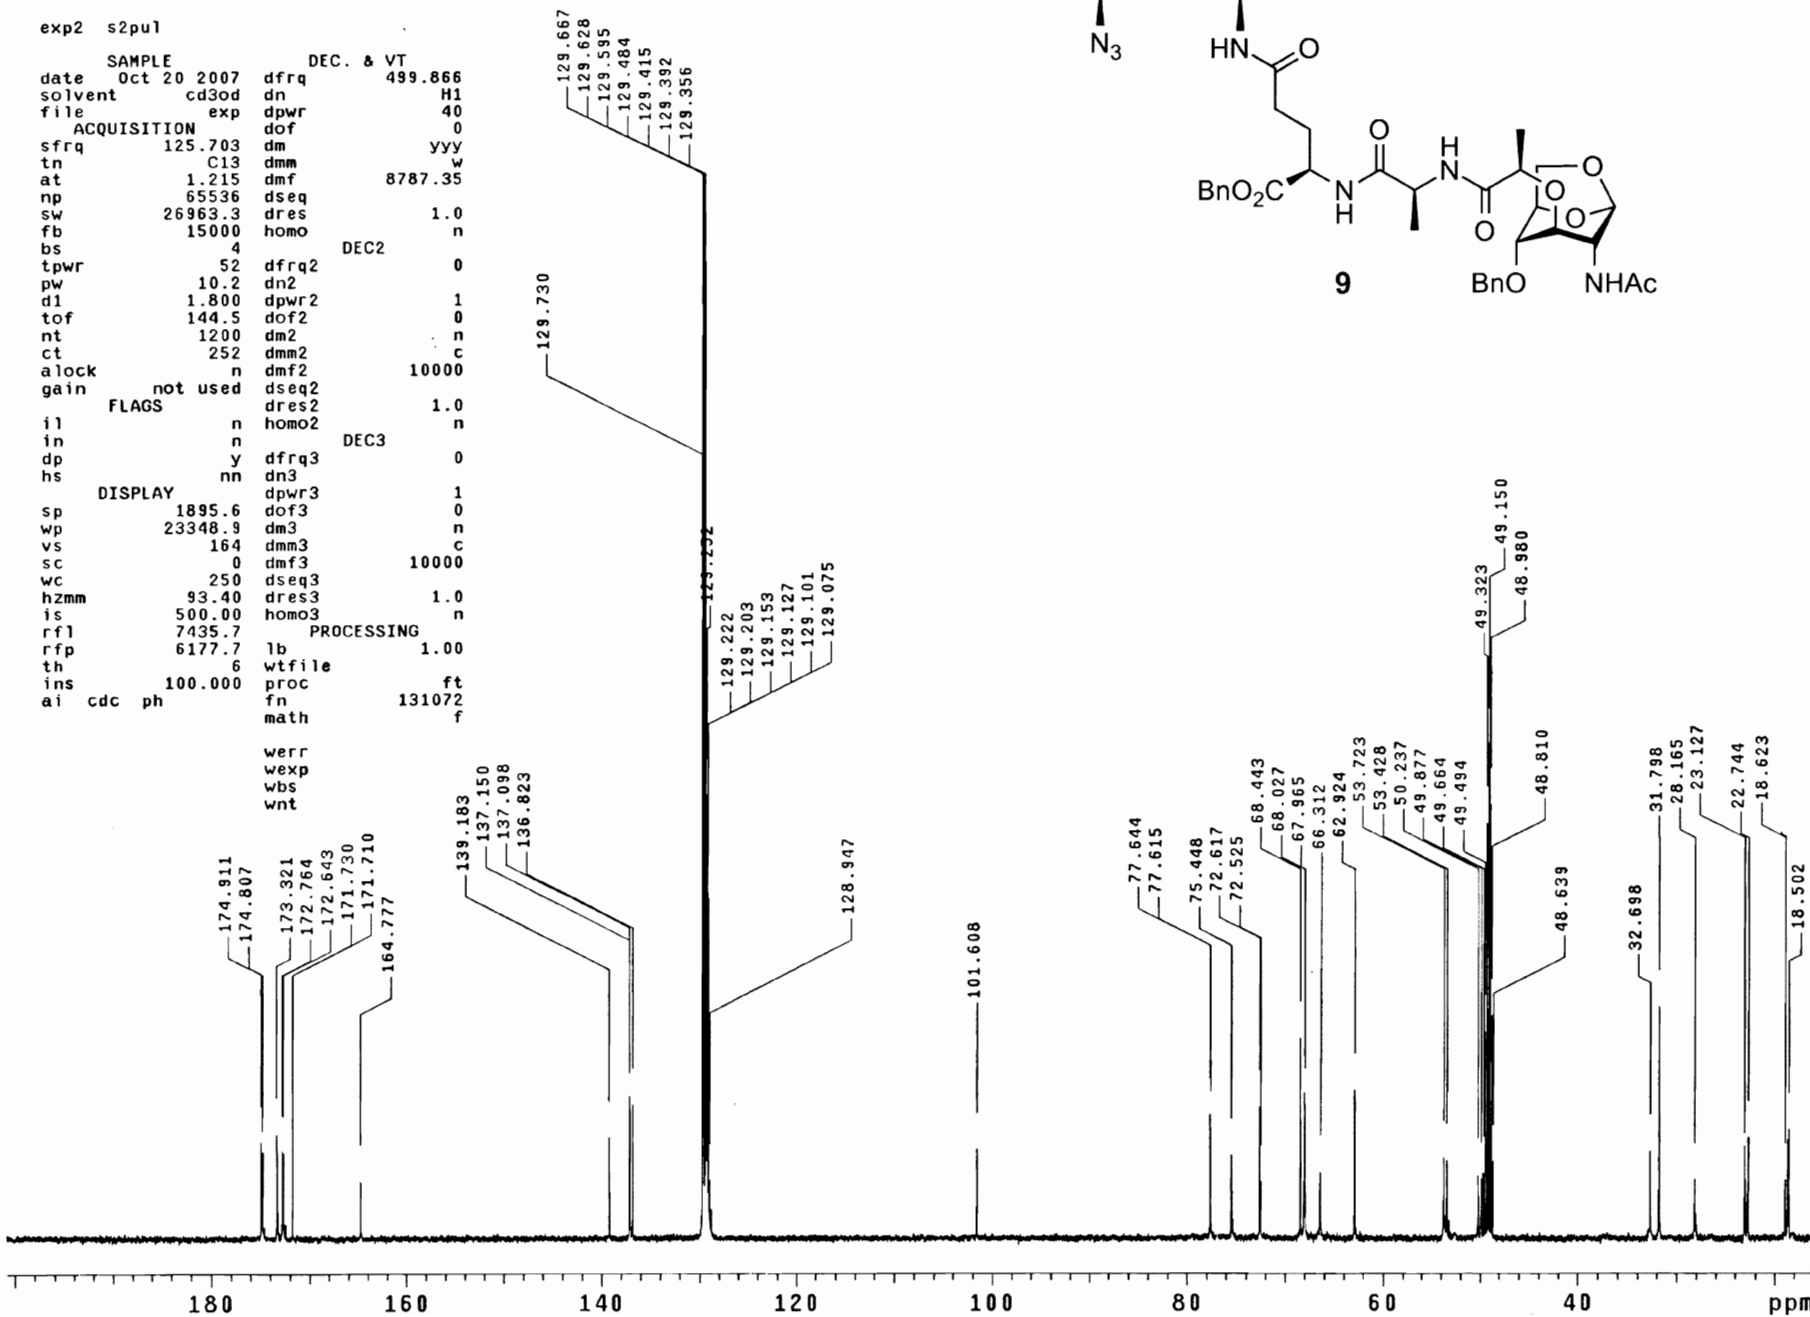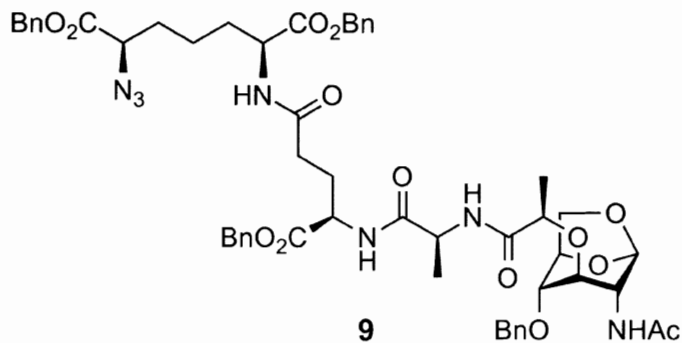



DHL-35

Pulse Sequence: dept

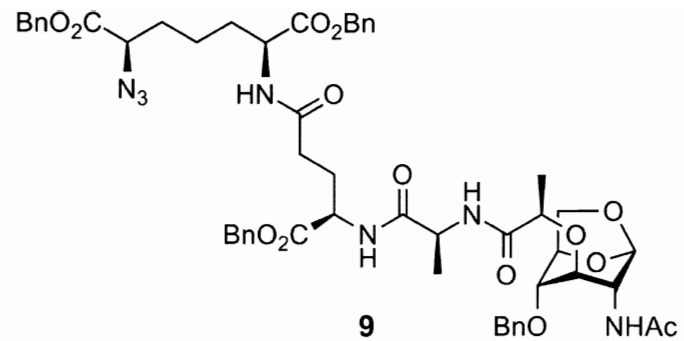

CH3 carbons

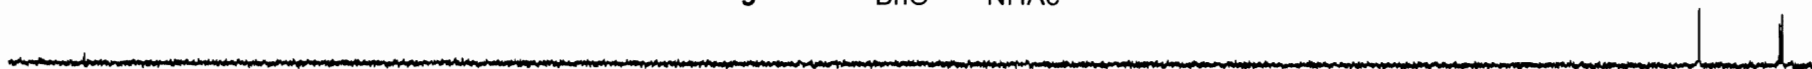

CH2 carbons

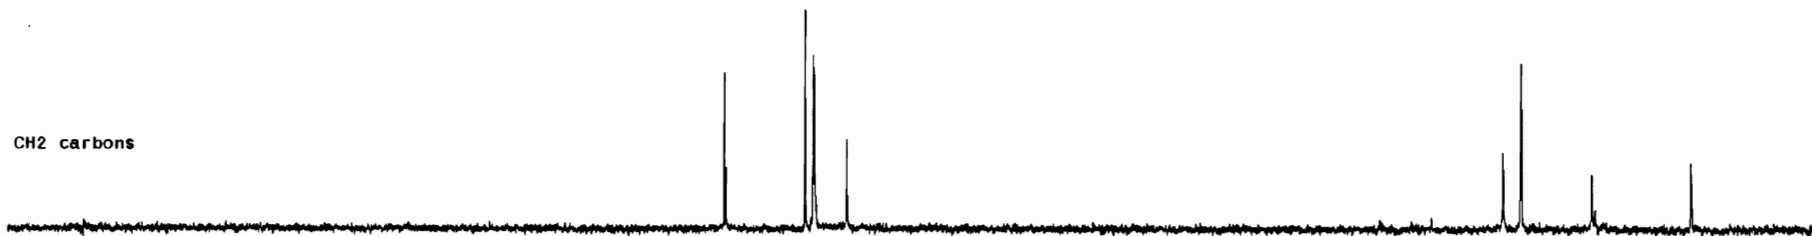

CH carbons

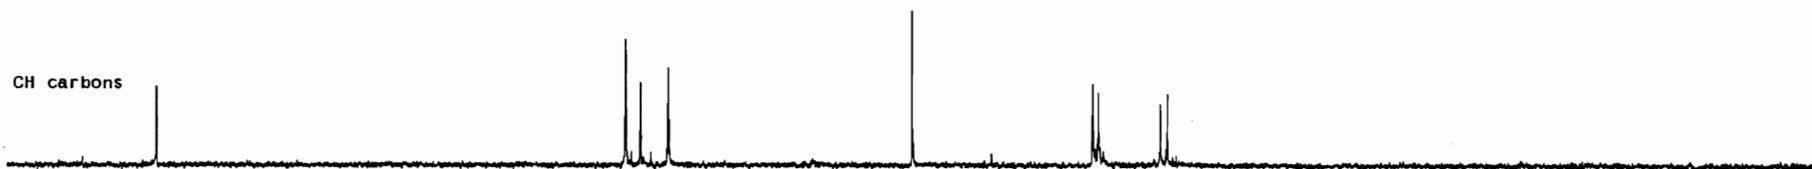

all protonated carbons

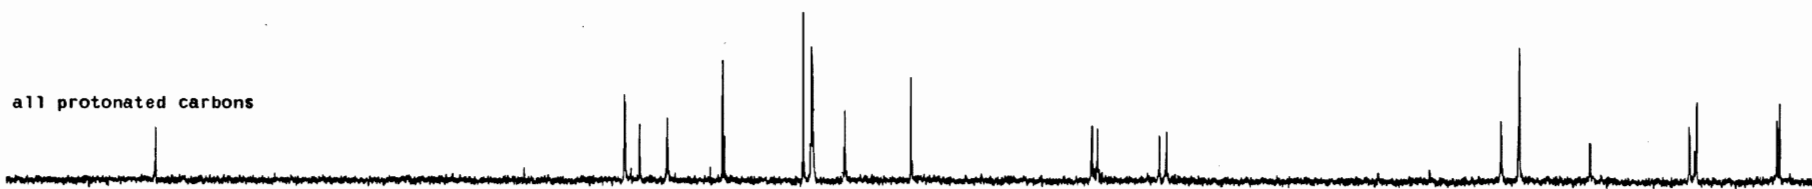

100

90

80

70

60

50

40

30

ppm

DHL-35

Pulse Sequence: hetcor

Solvent: cd3od

Ambient temperature

User: 1-14-87

INOVA-500 "nmr2a.chem.nd.edu"

Relax. delay 1.500 sec

Acq. time 0.111 sec

Width 18403.5 Hz

2D Width 3247.3 Hz

8 repetitions

256 increments

OBSERVE C13, 125.6905174 MHz

DECOUPLE H1, 499.8653292 MHz

Power 40 dB

on during acquisition

off during delay

WALTZ-16 modulated

DATA PROCESSING

Line broadening 1.0 Hz

F1 DATA PROCESSING

Line broadening 0.3 Hz

FT size 4096 x 512

Total time 57 min, 16 sec

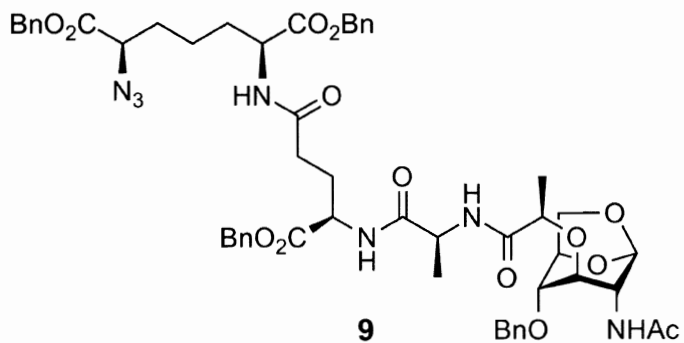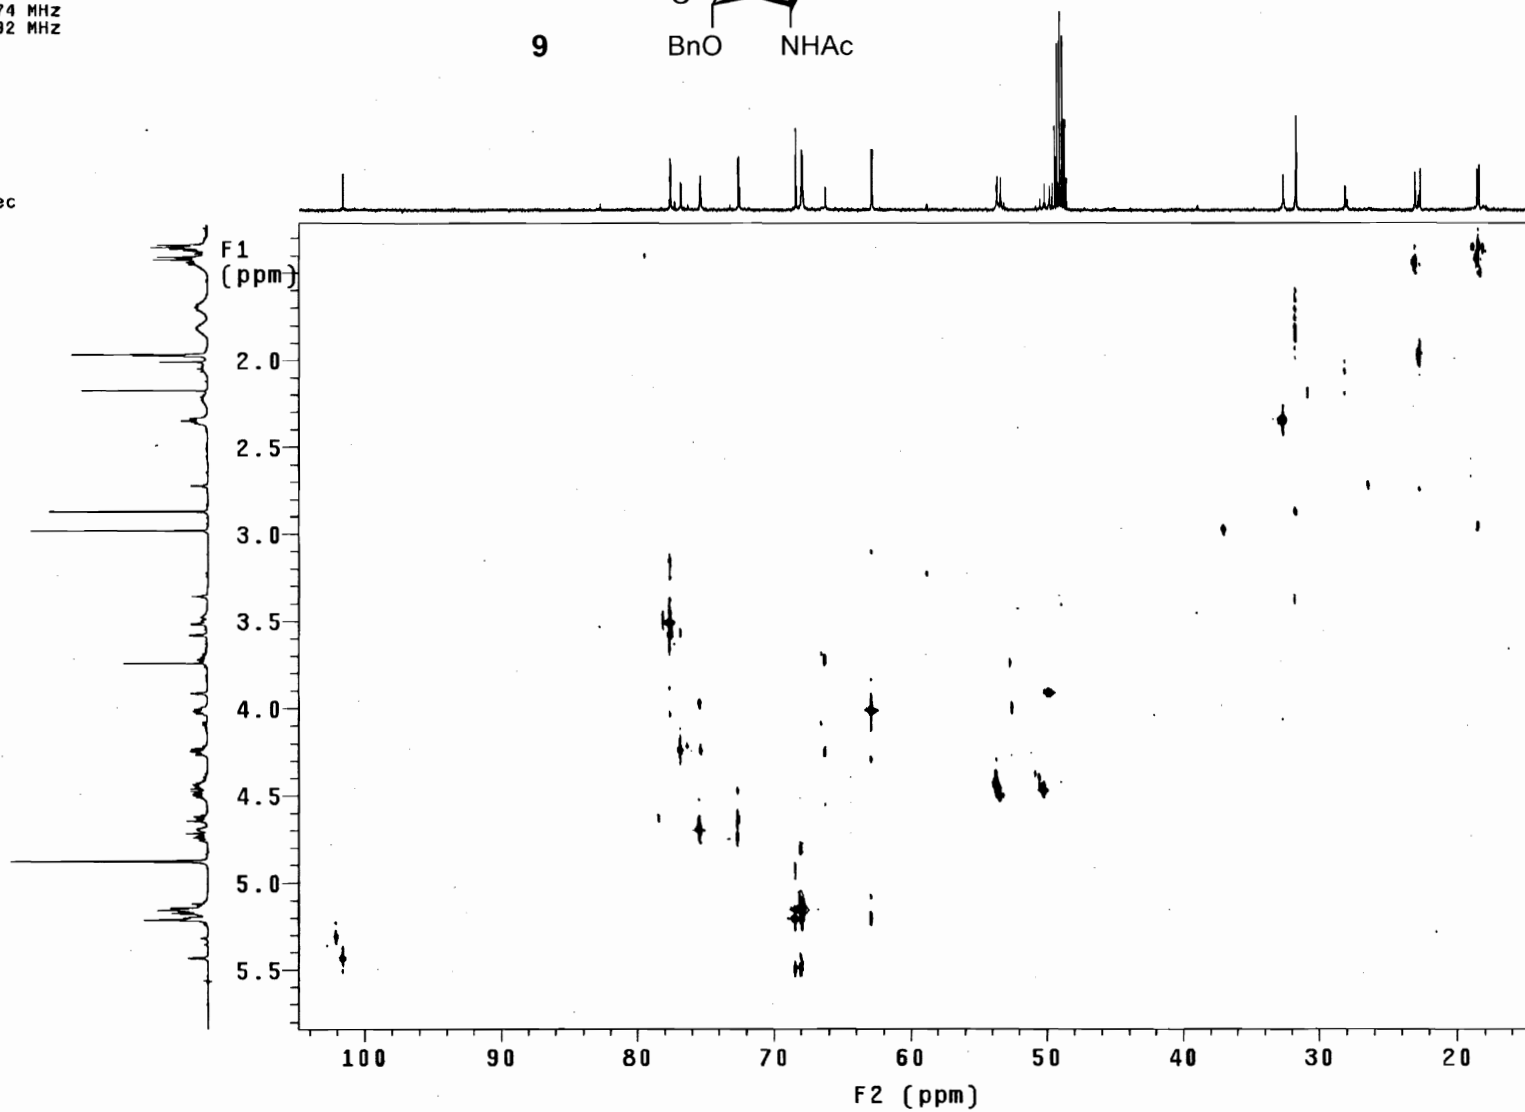

DHL-36

exp1 s2pu1

|             |            |            |           |
|-------------|------------|------------|-----------|
| SAMPLE      |            | DEC. & VT  |           |
| date        | Nov 1 2007 | dfrq       | 599.888   |
| solvent     | d2o        | dn         | H1        |
| file        | exp        | dpwr       | 30        |
| ACQUISITION |            | dof        | 0         |
| sfrq        | 599.888    | dm         | nnn       |
| tn          | H1         | dmm        | c         |
| at          | 4.096      | dmf        | 200       |
| np          | 65536      | dseq       |           |
| sw          | 8000.0     | dres       | 1.0       |
| fb          | 4400       | homo       | n         |
| bs          | 8          | DEC2       |           |
| tpwr        | 56         | dfrq2      | 0         |
| pw          | 10.7       | dn2        |           |
| d1          | 0.100      | dpwr2      | 1         |
| tof         | 0          | dof2       | 0         |
| nt          | 32         | dm2        | n         |
| ct          | 32         | dmm2       | c         |
| alock       | n          | dmf2       | 200       |
| gain        | not used   | dseq2      |           |
| FLAGS       |            | dres2      | 1.0       |
| il          | n          | homo2      | n         |
|             |            | PROCESSING |           |
| in          | n          | wtfile     | ft        |
| dp          | y          | proc       | 131072    |
| hs          | nn         | fn         | f         |
| DISPLAY     |            | math       | f         |
| sp          | -897.8     |            |           |
| wp          | 8000.0     |            |           |
| vs          | 162        | werr       |           |
| sc          | 0          | wexp       | proc_H pH |
| wc          | 250        | wbs        |           |
| hzmm        | 32.00      | wnt        | wft       |
| is          | 331.73     |            |           |
| rfl         | 3777.3     |            |           |
| rfp         | 2879.4     |            |           |
| th          | 7          |            |           |
| ins         | 6.000      |            |           |
| nm          | cdc ph     |            |           |

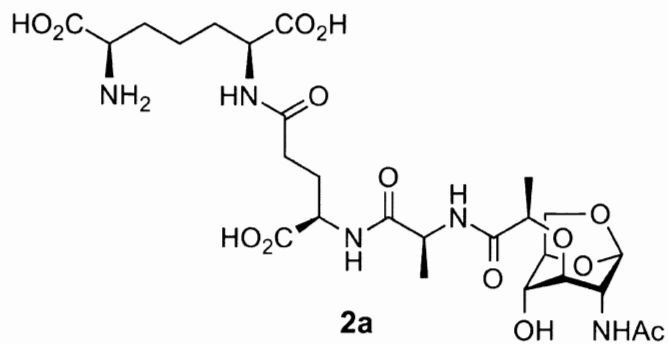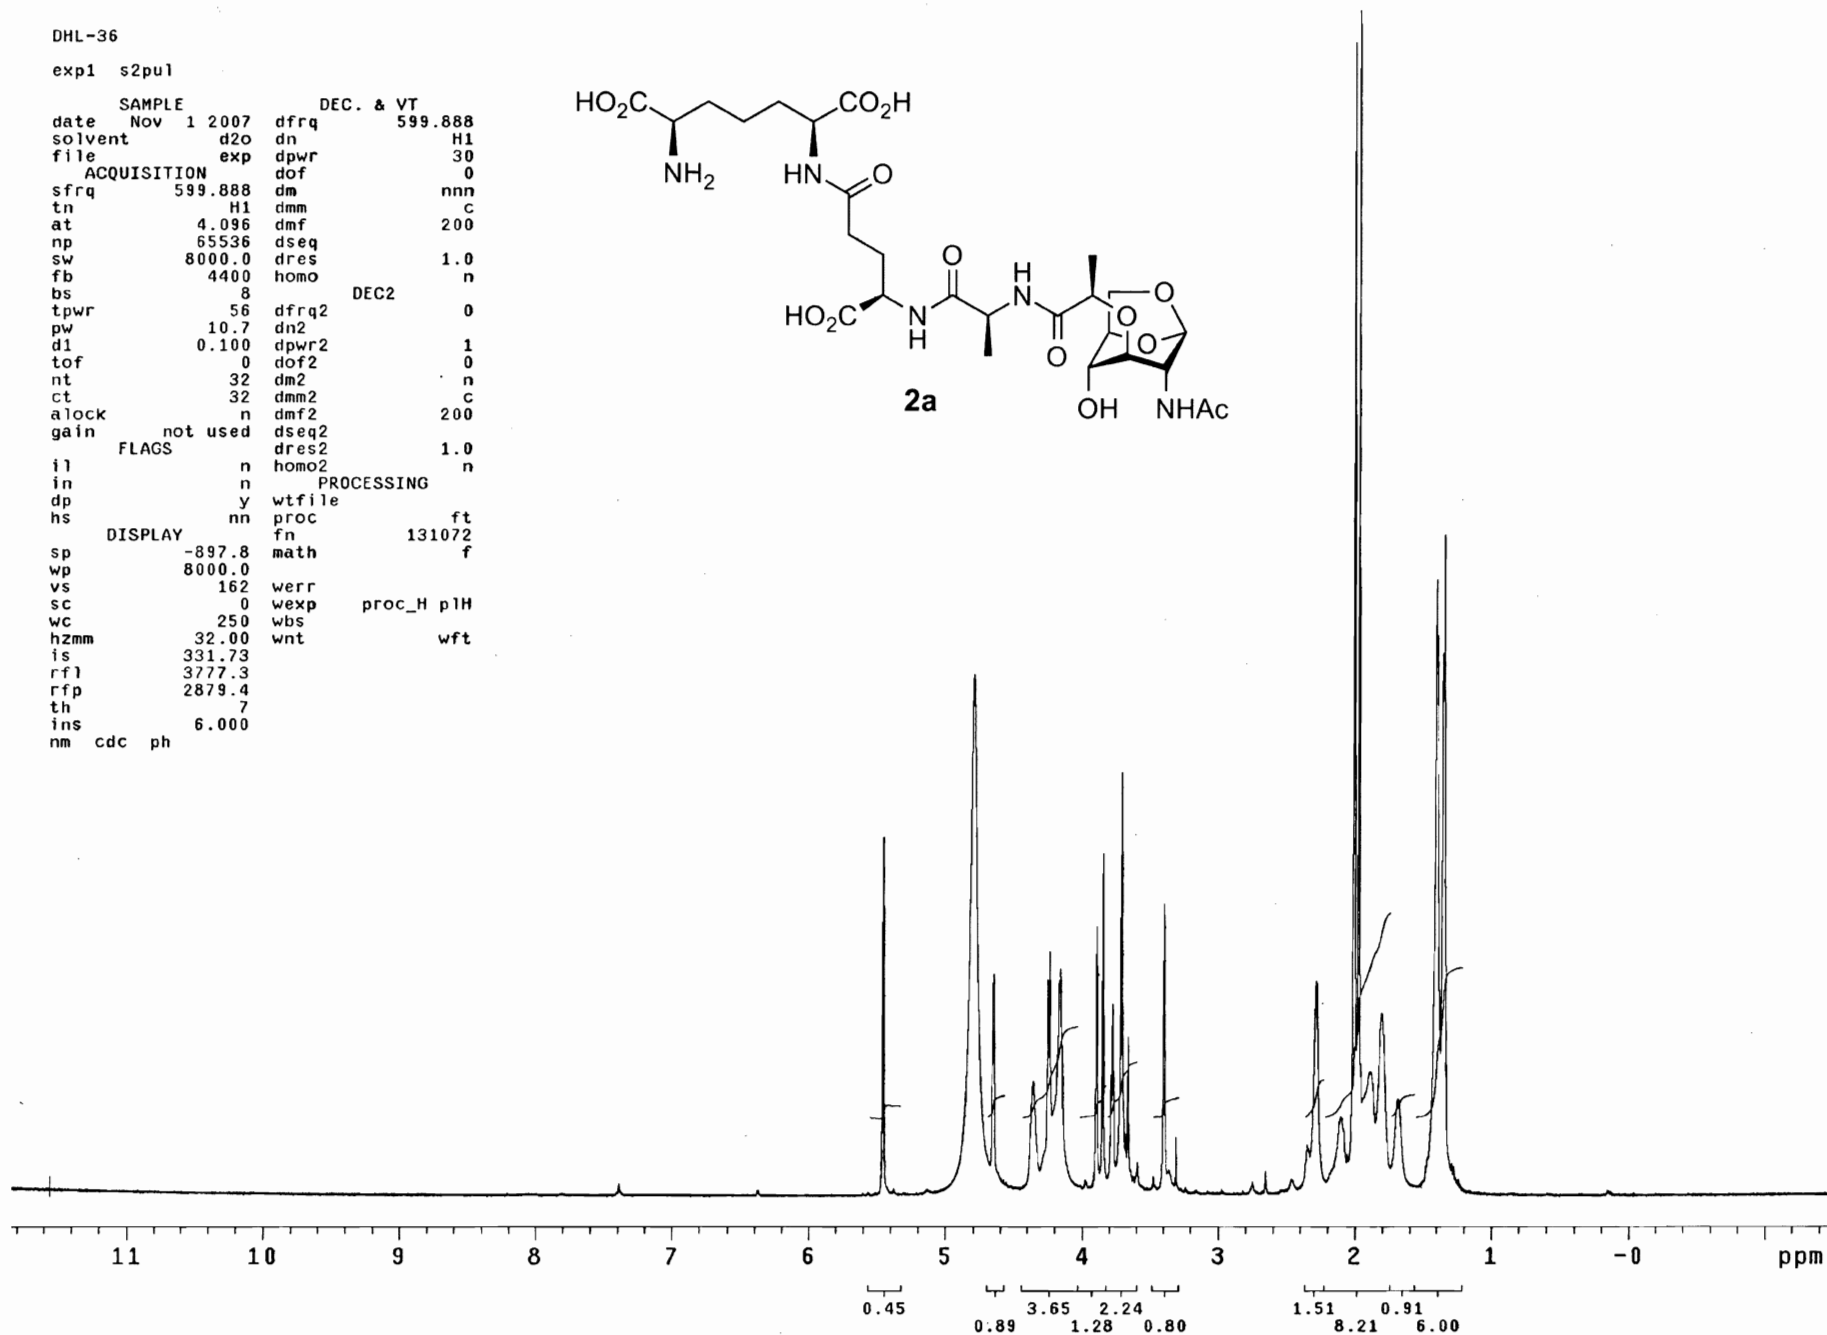

DHL-36

Pulse Sequence: relayh

Solvent: d2o

Ambient temperature

UNITYplus-600 "tesla"

Relax. delay 1.000 sec

COSY 90-90

Acq. time 0.182 sec

Width 2817.3 Hz

2D Width 2817.3 Hz

16 repetitions

512 increments

OBSERVE H1, 599.8853710 MHz

DATA PROCESSING

Sine bell 0.091 sec

F1 DATA PROCESSING

Sine bell 0.045 sec

FT size 1024 x 1024

Total time 2 hr, 55 min, 27 sec

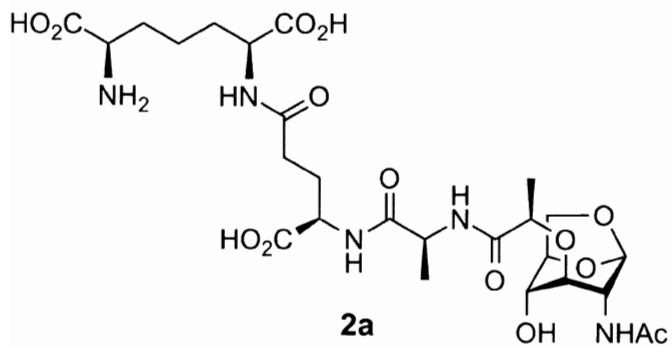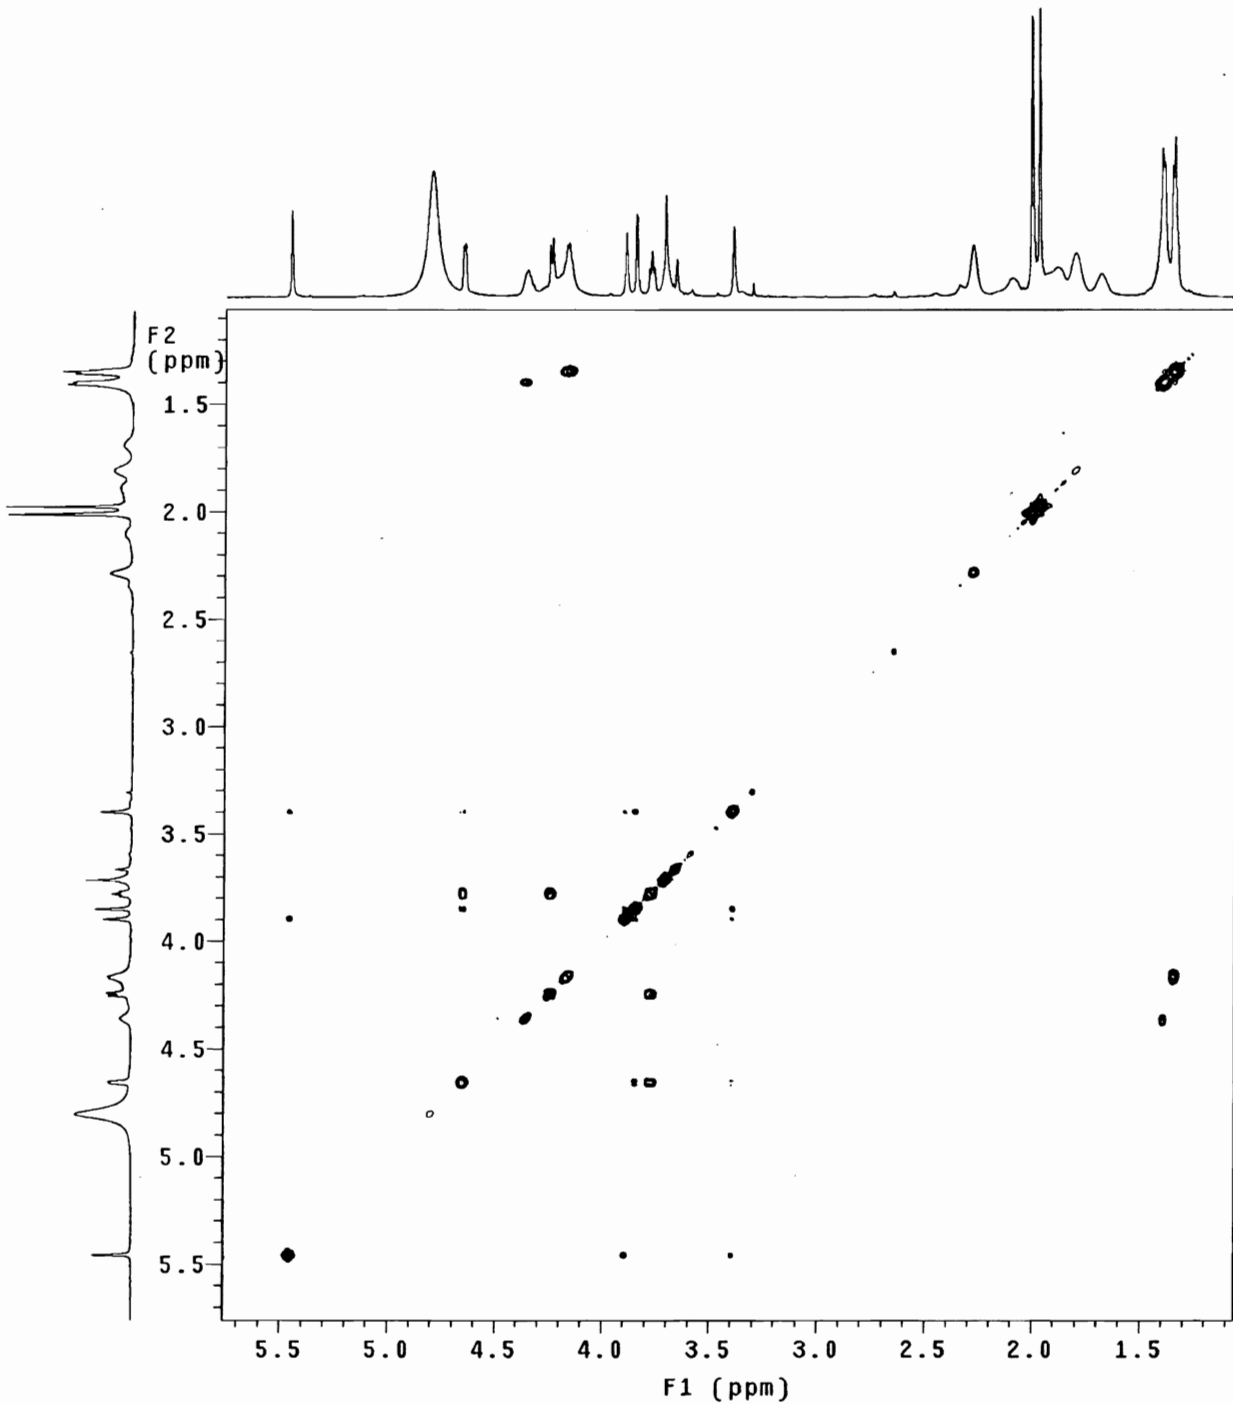

DHL-36

exp5 s2pu1

|             |            |            |             |
|-------------|------------|------------|-------------|
| SAMPLE      |            | DEC. & VT  |             |
| date        | Nov 1 2007 | dfrq       | 599.888     |
| solvent     | d2o        | dn         | H1          |
| file        | exp        | dpwr       | 36          |
| ACQUISITION |            | dof        | 0           |
| sfrq        | 150.856    | dm         | yyy         |
| tn          | C13        | dmm        | w           |
| at          | 0.963      | dmf        | 9708        |
| np          | 65536      | dseq       |             |
| sw          | 34013.6    | dres       | 1.0         |
| fb          | 18800      | homo       | n           |
| bs          | 4          | DEC2       |             |
| tpwr        | 51         | dfrq2      | 0           |
| pw          | 8.0        | dn2        |             |
| d1          | 2.000      | dpwr2      | 1           |
| tof         | 1576.9     | dof2       | 0           |
| nt          | 12000      | dm2        | n           |
| ct          | 9342       | dmm2       | C           |
| alock       | n          | dmf2       | 15202       |
| gain        | not used   | dseq2      |             |
| FLAGS       |            | dres2      | 1.0         |
| fl          | n          | homo2      | n           |
| in          | n          | PROCESSING |             |
| dp          | y          | lb         | 1.00        |
| hs          | nn         | wtfile     |             |
| DISPLAY     |            | proc       | ft          |
| sp          | 1376.1     | fn         | 131072      |
| wp          | 25833.9    | math       | f           |
| vs          | 45         |            |             |
| sc          | 0          | werr       |             |
| wc          | 250        | wexp       | process p1C |
| hzmm        | 103.34     | wbs        | wft         |
| is          | 500.00     | wnt        |             |
| rfl         | 1931.1     |            |             |
| rfp         | 0          |            |             |
| th          | 6          |            |             |
| ins         | 100.000    |            |             |
| nm          | cdc ph     |            |             |

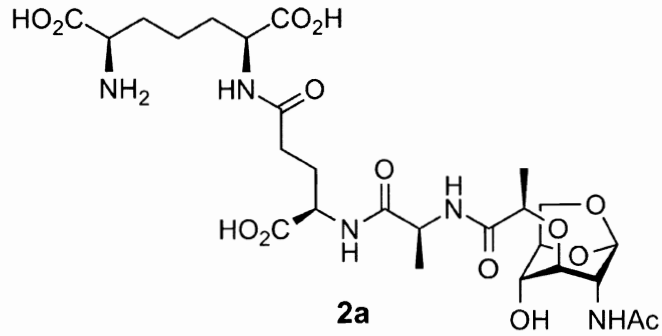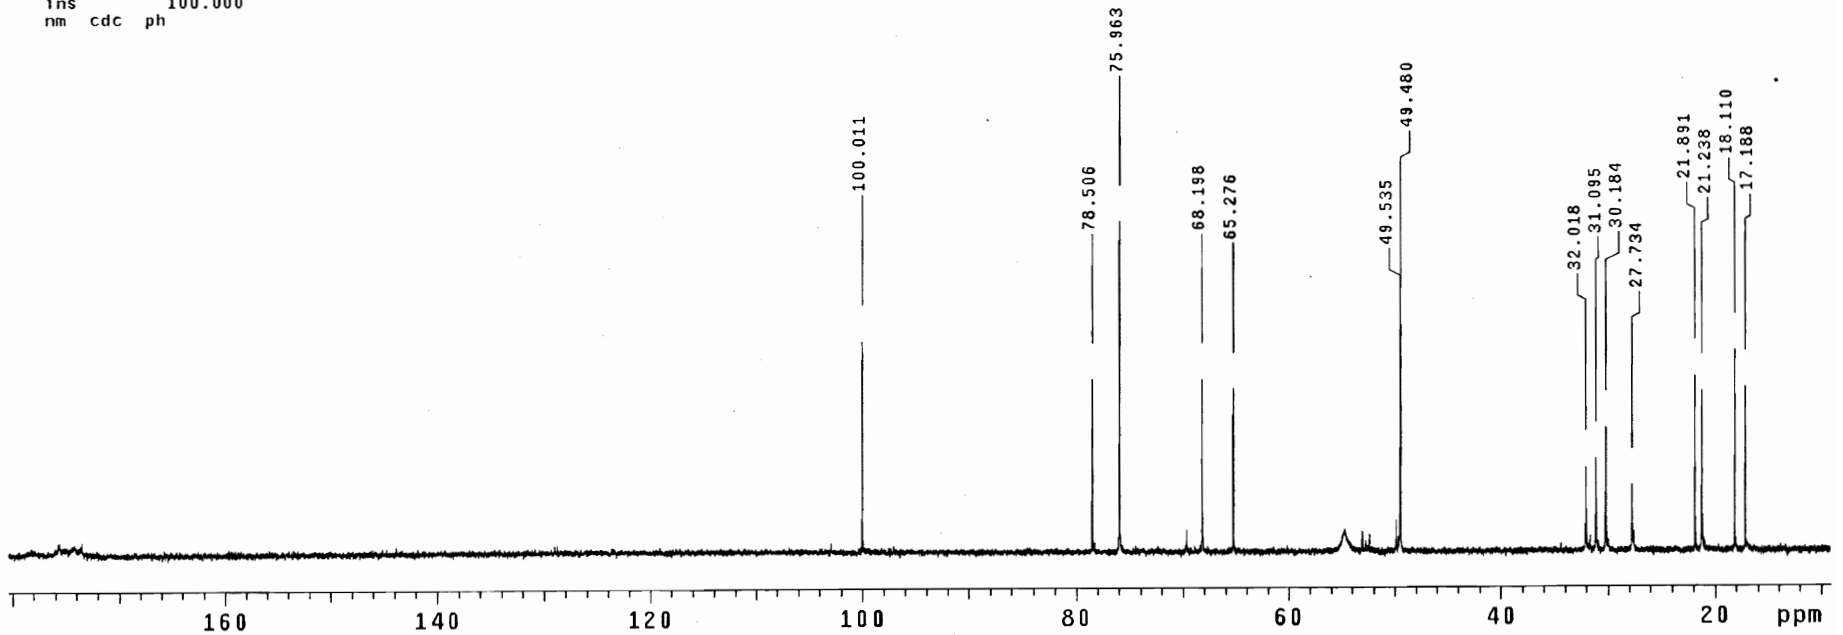

DHL-36

Pulse Sequence: dept

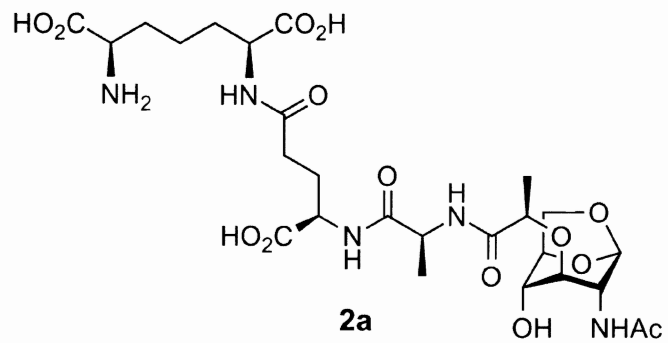

CH3 carbons

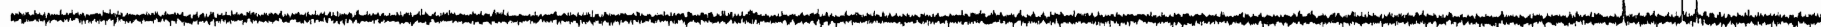

CH2 carbons

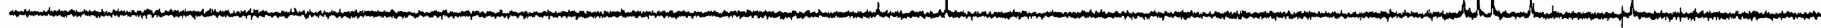

CH carbons

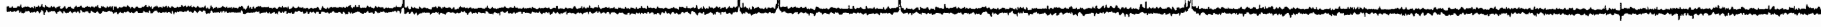

all protonated carbons

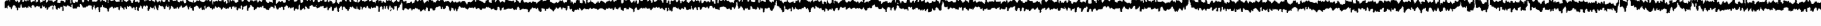

120

110

100

90

80

70

60

50

40

30

20

ppm

DHL-36

Pulse Sequence: hetcor

Solvent: d2o

Ambient temperature

User: 1-14-87

UNITYplus-600 "tesla"

Relax. delay 1.400 sec

Acq. time 0.072 sec

Width 14260.2 Hz

2D Width 2922.5 Hz

24 repetitions

512 increments

OBSERVE C13, 150.8412863 MHz

DECOUPLE H1, 599.8874375 MHz

Power 36 dB

on during acquisition

off during delay

WALTZ-16 modulated

DATA PROCESSING

Line broadening 1.0 Hz

F1 DATA PROCESSING

Line broadening 0.3 Hz

FT size 2048 x 512

Total time 5 hr, 24 min, 49 sec

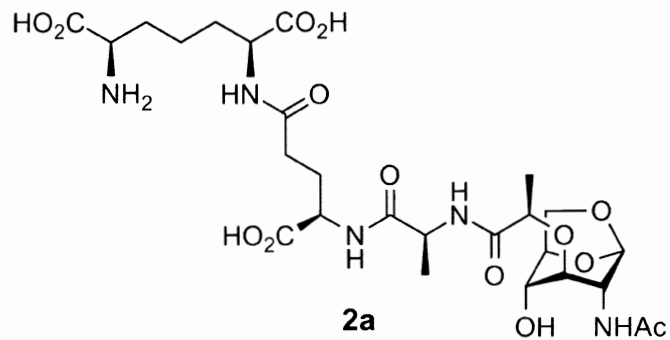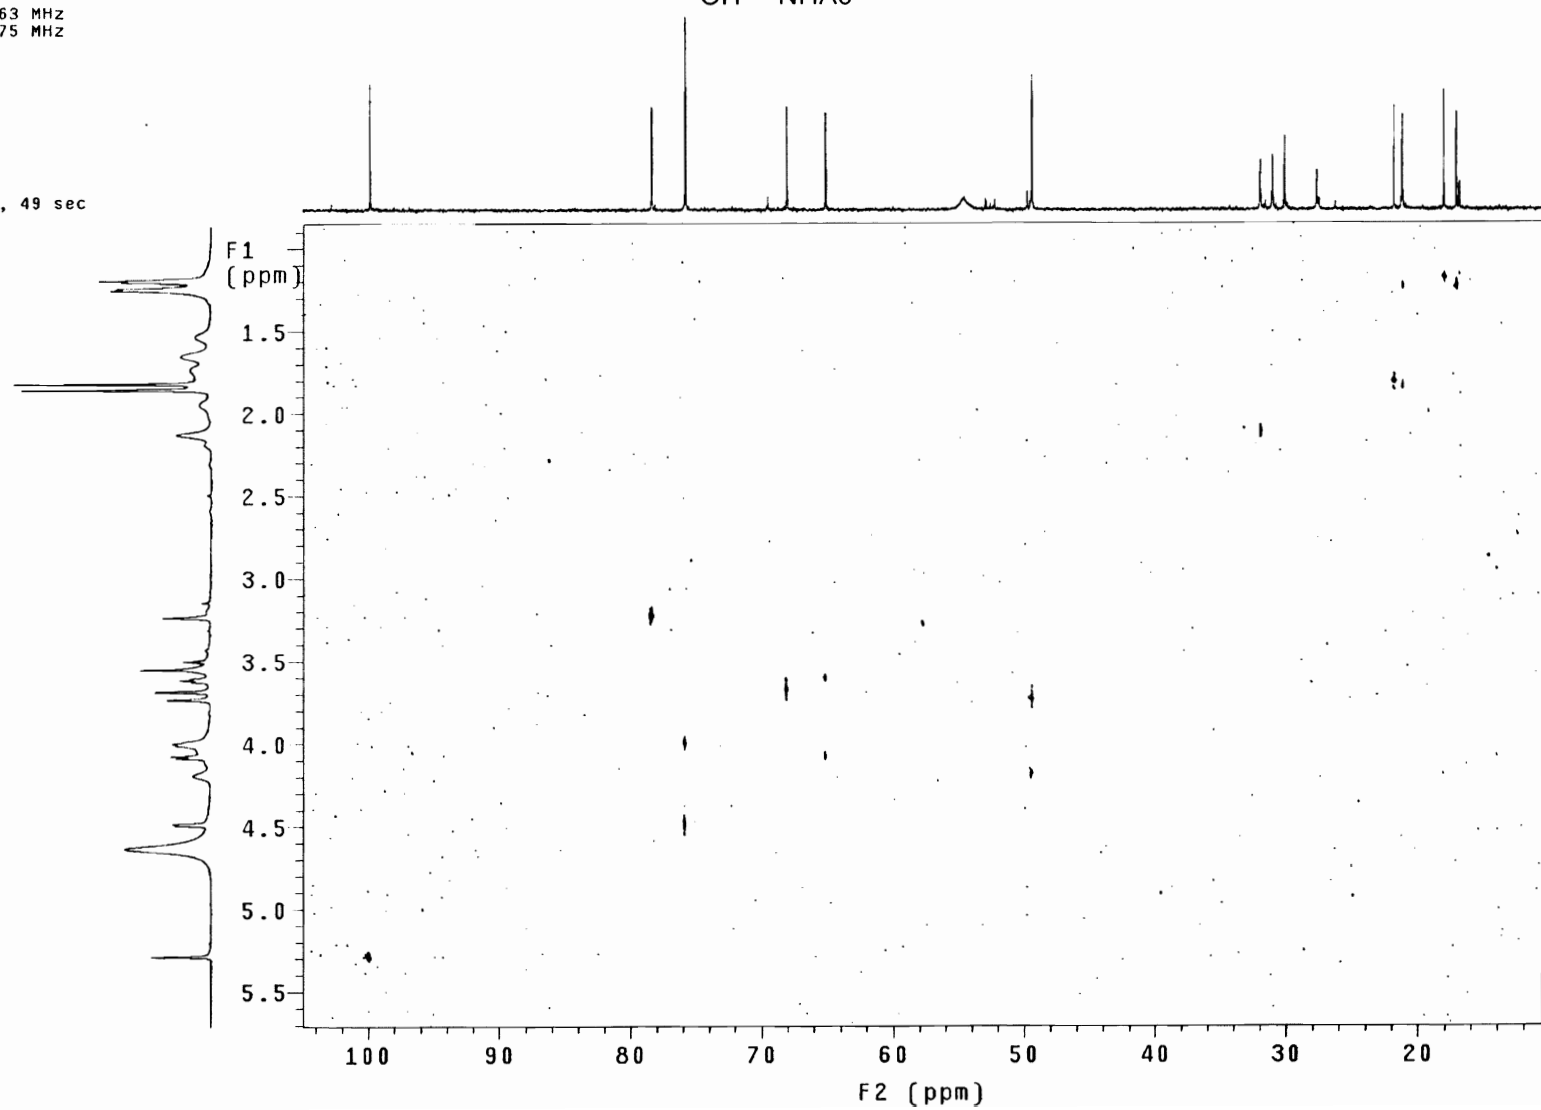

DHL-42

exp7 Proton

|             |             |            |          |
|-------------|-------------|------------|----------|
| SAMPLE      |             | SPECIAL    |          |
| date        | Jan 15 2008 | temp       | 22.0     |
| solvent     | cd3cn       | gain       | not used |
| file        | exp         | spin       | not used |
| ACQUISITION |             | hst        | 0.008    |
| sw          | 9615.4      | pw90       | 11.100   |
| at          | 2.049       | alfa       | 10.000   |
| np          | 39396       | FLAGS      |          |
| fb          | 4000        | il         | n        |
| bs          | 32          | in         | n        |
| ss          | 2           | dp         | y        |
| d1          | 1.000       | hs         | nn       |
| nt          | 16          | PROCESSING |          |
| ct          | 16          | fn         | 65536    |
| TRANSMITTER |             | DISPLAY    |          |
| tn          | H1          | sp         | 652.0    |
| sfrq        | 599.880     | wp         | 5281.3   |
| tof         | 599.9       | rfl        | 1208.4   |
| tpwr        | 61          | rfp        | 0        |
| pw          | 5.550       | rp         | -192.9   |
| DECOUPLER   |             | lp         | 2.9      |
| dn          | C13         | PLOT       |          |
| dof         | 0           | wc         | 250      |
| dm          | nnn         | sc         | 0        |
| dmm         | c           | vs         | 328      |
| dpwr        | 38          | th         | 12       |
| dmf         | 35088       | ai         | cdc ph   |

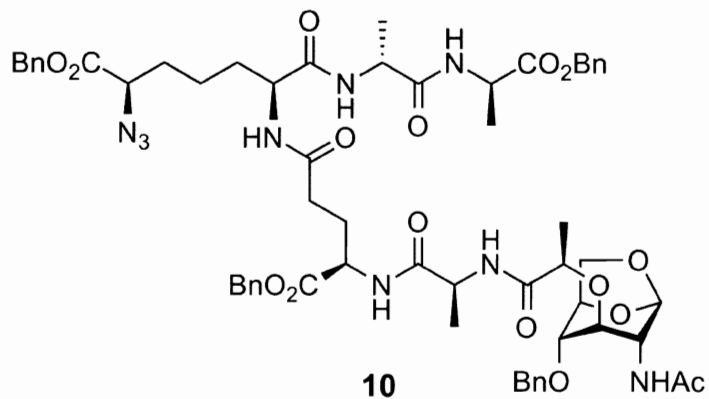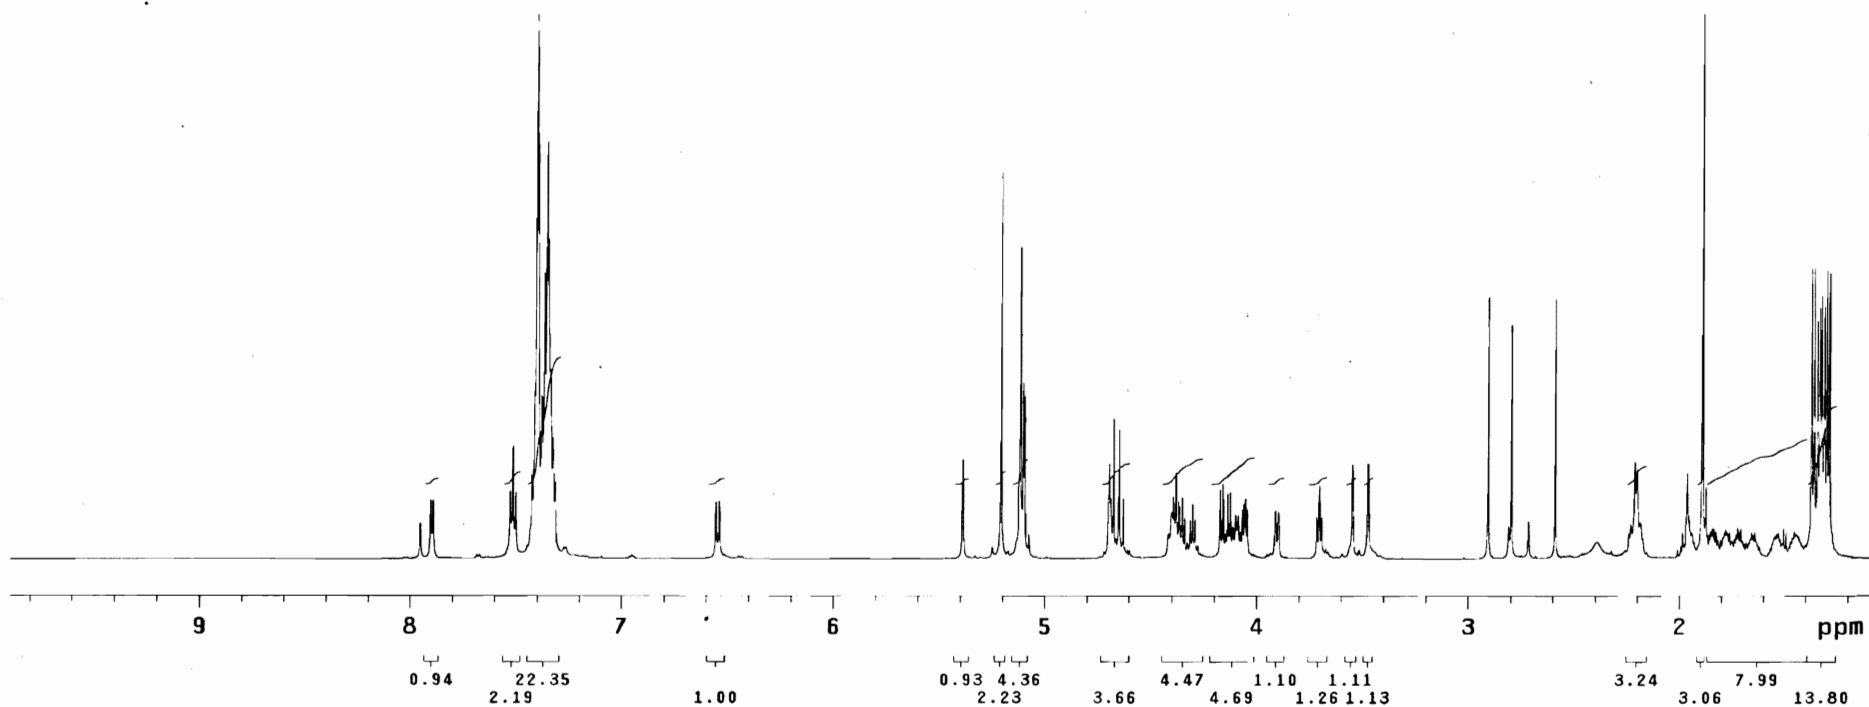



DHL-42

File: xp

Pulse Sequence: gCOSY

Solvent: cd3cn

Temp. 22.0 C / 295.1 K

Operator: dhesek

VNMRS-600 "nmr600"

Relax. delay 1.000 sec

Acq. time 0.244 sec

Width 4194.6 Hz

2D Width 4194.6 Hz

8 repetitions

256 increments

OBSERVE H1, 599.8760308 MHz

DATA PROCESSING

Sine bell 0.122 sec

F1 DATA PROCESSING

Sine bell 0.122 sec

FT size 4096 x 4096

Total time 44 min, 26 sec

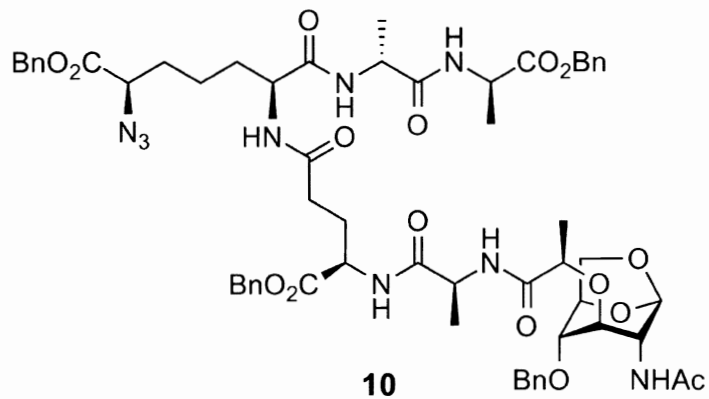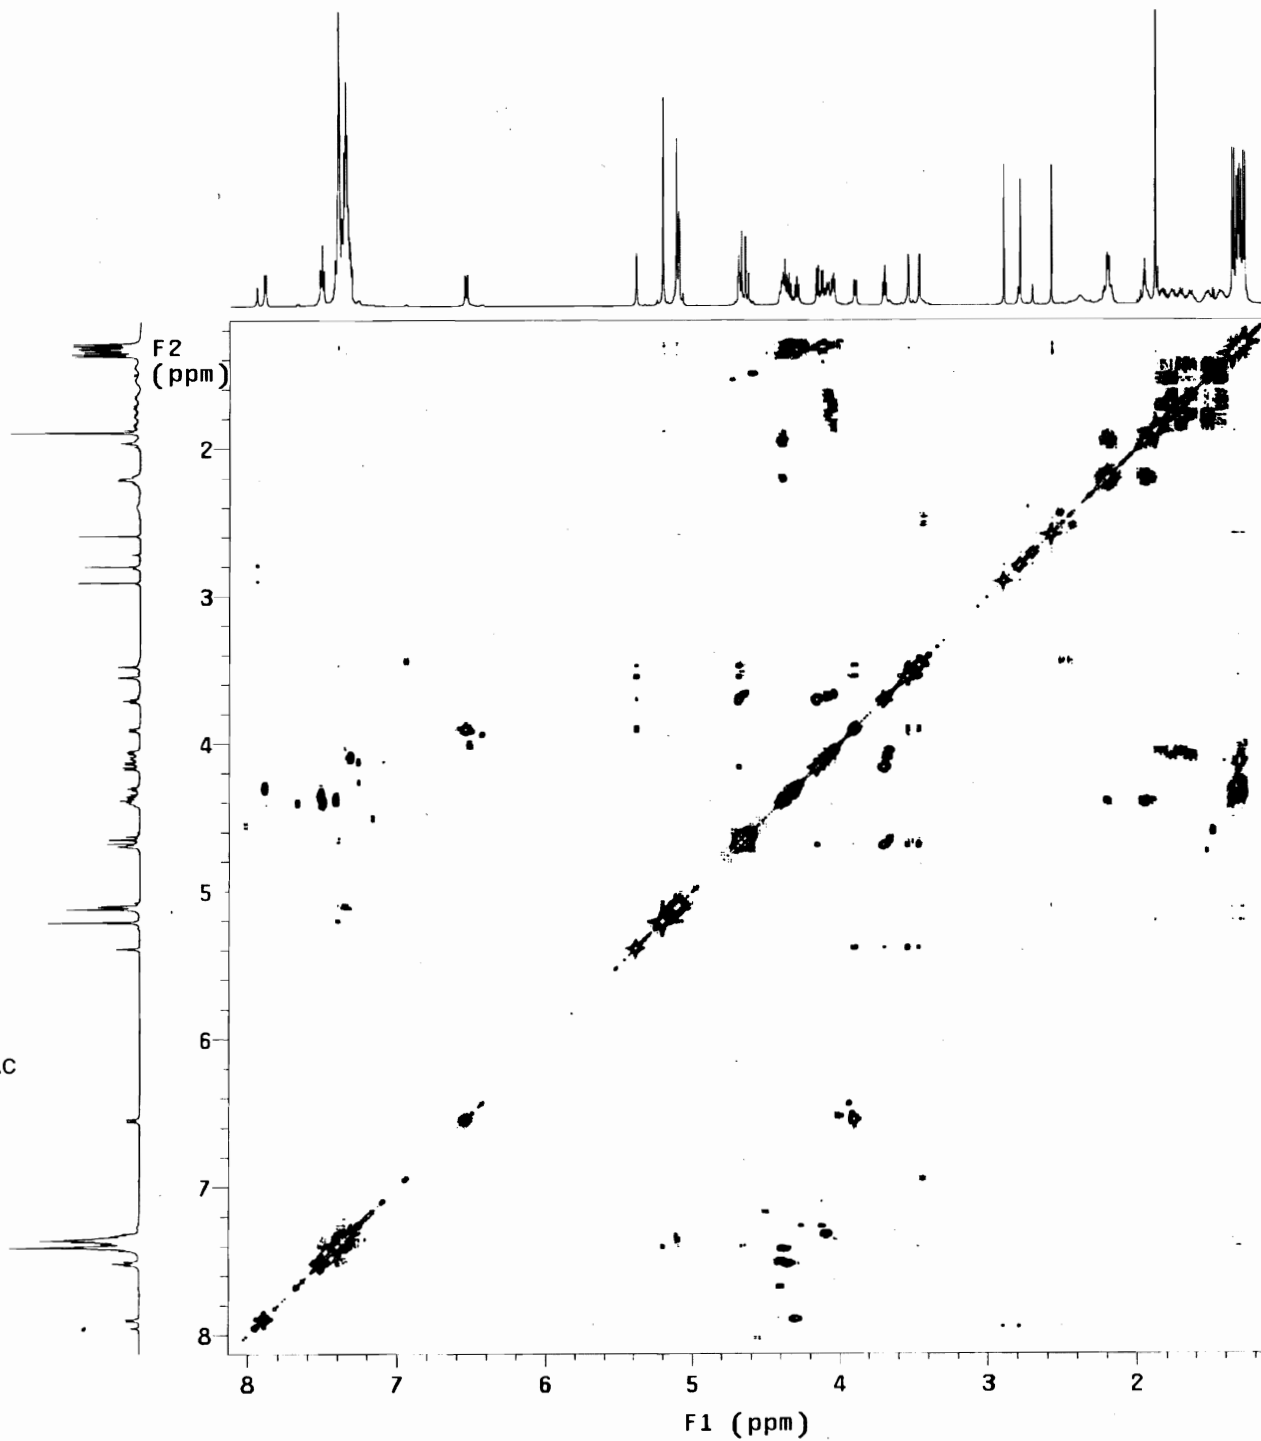

DHL-42

File: xp

Pulse Sequence: gCOSY

Solvent: cd3cn  
Temp. 22.0 C / 295.1 K  
Operator: dhsek  
VNMR5-600 "nmr600"

Relax. delay 1.000 sec  
Acq. time 0.244 sec  
Width 4194.6 Hz  
2D Width 4194.6 Hz  
8 repetitions  
256 increments  
OBSERVE H1, 599.8760308 MHz  
DATA PROCESSING  
Sine bell 0.122 sec  
F1 DATA PROCESSING  
Sine bell 0.122 sec  
FT size 4096 x 4096  
Total time 44 min, 26 sec

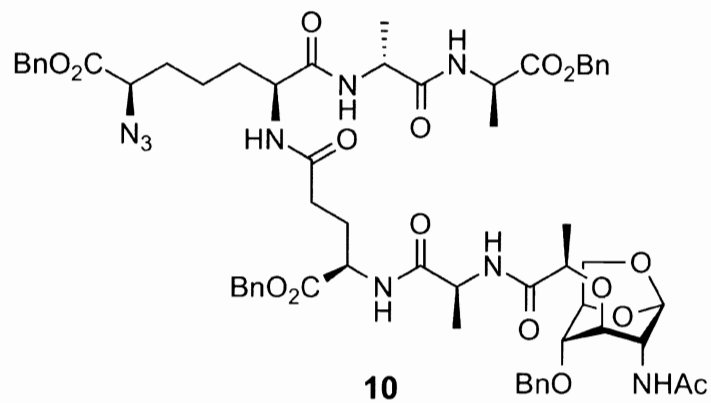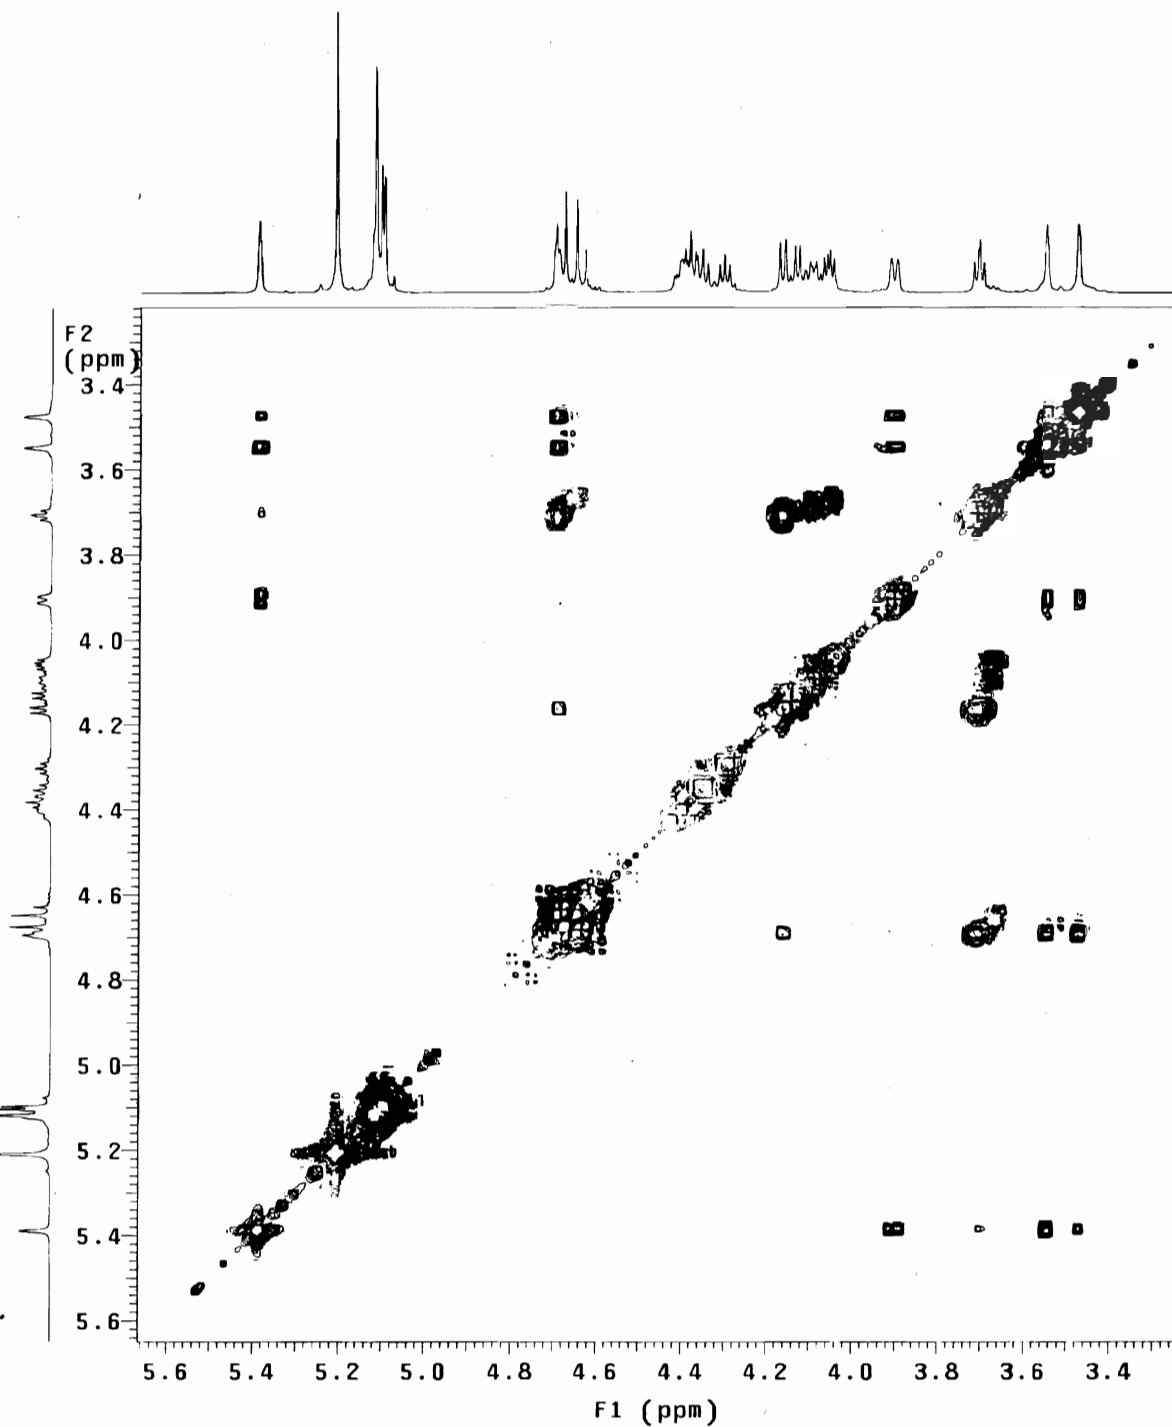

DHL-42

exp2 Carbon

|             |             |            |          |
|-------------|-------------|------------|----------|
| SAMPLE      |             | SPECIAL    |          |
| date        | Jan 18 2008 | temp       | 22.0     |
| solvent     | CDC13       | gain       | not used |
| file        | exp         | spin       | not used |
| ACQUISITION |             | hst        | 0.008    |
| sw          | 36764.7     | pw90       | 7.500    |
| at          | 1.300       | aifa       | 10.000   |
| np          | 95624       | FLAGS      |          |
| fb          | 17000       | il         | n        |
| bs          | 4           | in         | n        |
| d1          | 1.000       | dp         | y        |
| nt          | 128         | hs         | nn       |
| ct          | 128         | PROCESSING |          |
| TRANSMITTER |             | lb         | 0.50     |
| tn          | C13         | fn         | not used |
| sfrq        | 150.854     | DISPLAY    |          |
| tof         | 1542.6      | sp         | 2303.8   |
| tpwr        | 58          | wp         | 24844.9  |
| pw          | 3.750       | rfl        | 3402.9   |
| DECOUPLER   |             | rfl        | 209.7    |
| dn          | H1          | rp         | 148.3    |
| dof         | 0           | lp         | 14.4     |
| dm          | yyy         | PLOT       |          |
| dmm         | w           | wc         | 250      |
| dpwr        | 44          | sc         | 0        |
| dmf         | 13908       | vs         | 358      |
|             |             | th         | 6        |
|             |             | ai         | cdc ph   |

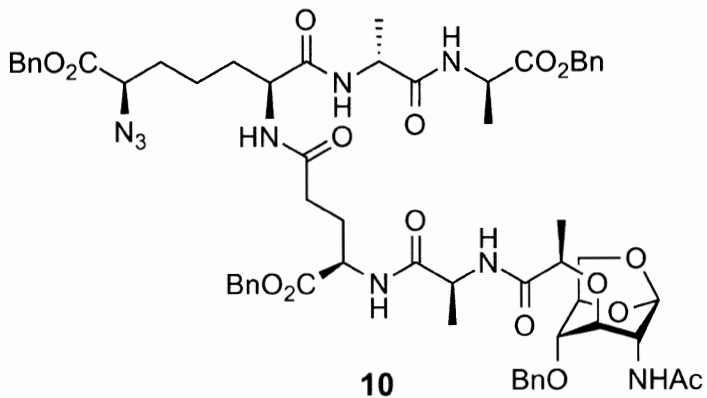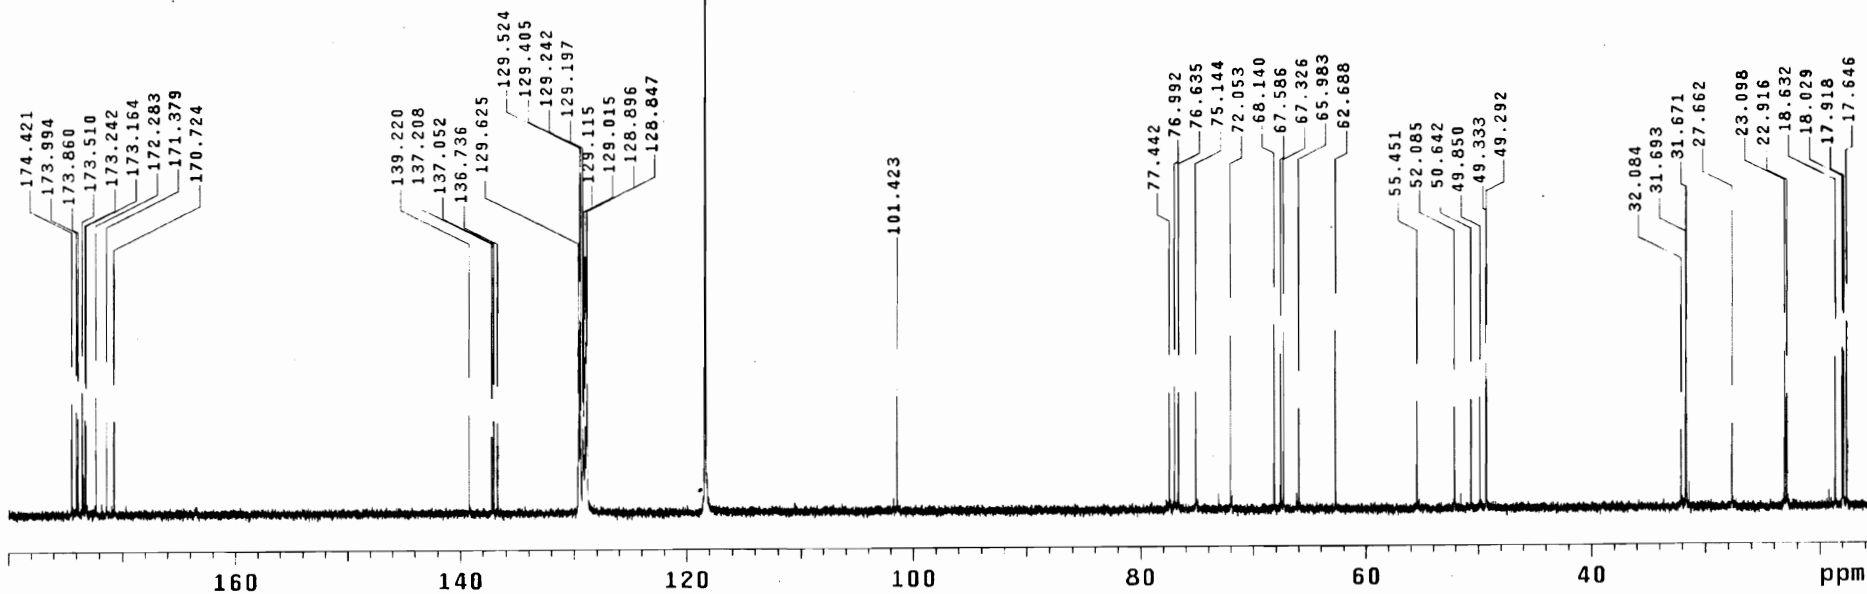

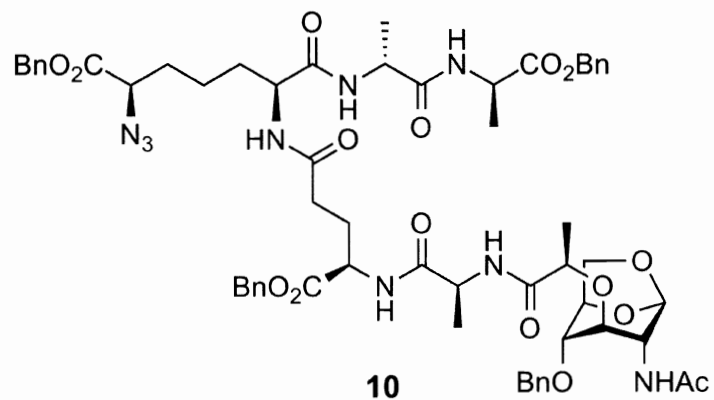

DHL-42

File: xp

Pulse Sequence: DEPT

CH3 carbons

CH2 carbons

CH carbons

all protonated carbons

120

100

80

60

40

20

0

ppm

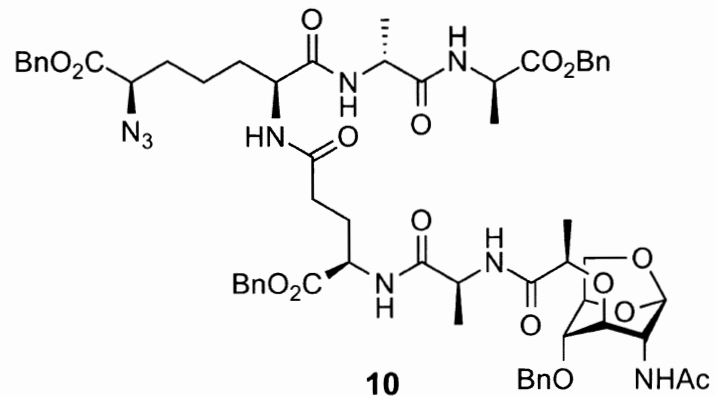

DHL-42

File: xp

Pulse Sequence: HETCOR

Solvent: cd3cn

Temp. 22.0 C / 295.1 K

Operator: dhsek

VNMRS-600 "nmr600"

Relax. delay 1.313 sec

Acq. time 0.187 sec

Width 21929.8 Hz

2D Width 5398.9 Hz

8 repetitions

2 x 128 increments

OBSERVE C13, 150.8387992 MHz

DECOUPLE H1, 599.8787302 MHz

Power 44 dB

on during acquisition

off during delay

WALTZ-16 modulated

DATA PROCESSING

Gauss apodization 0.086 sec

F1 DATA PROCESSING

Gauss apodization 0.022 sec

FT size 8192 x 2048

Total time 52 min, 33 sec

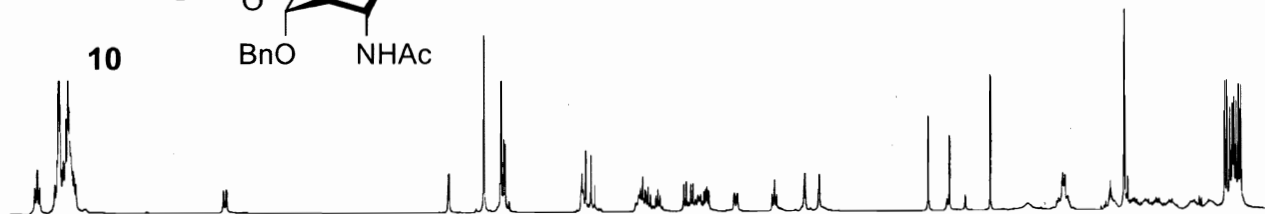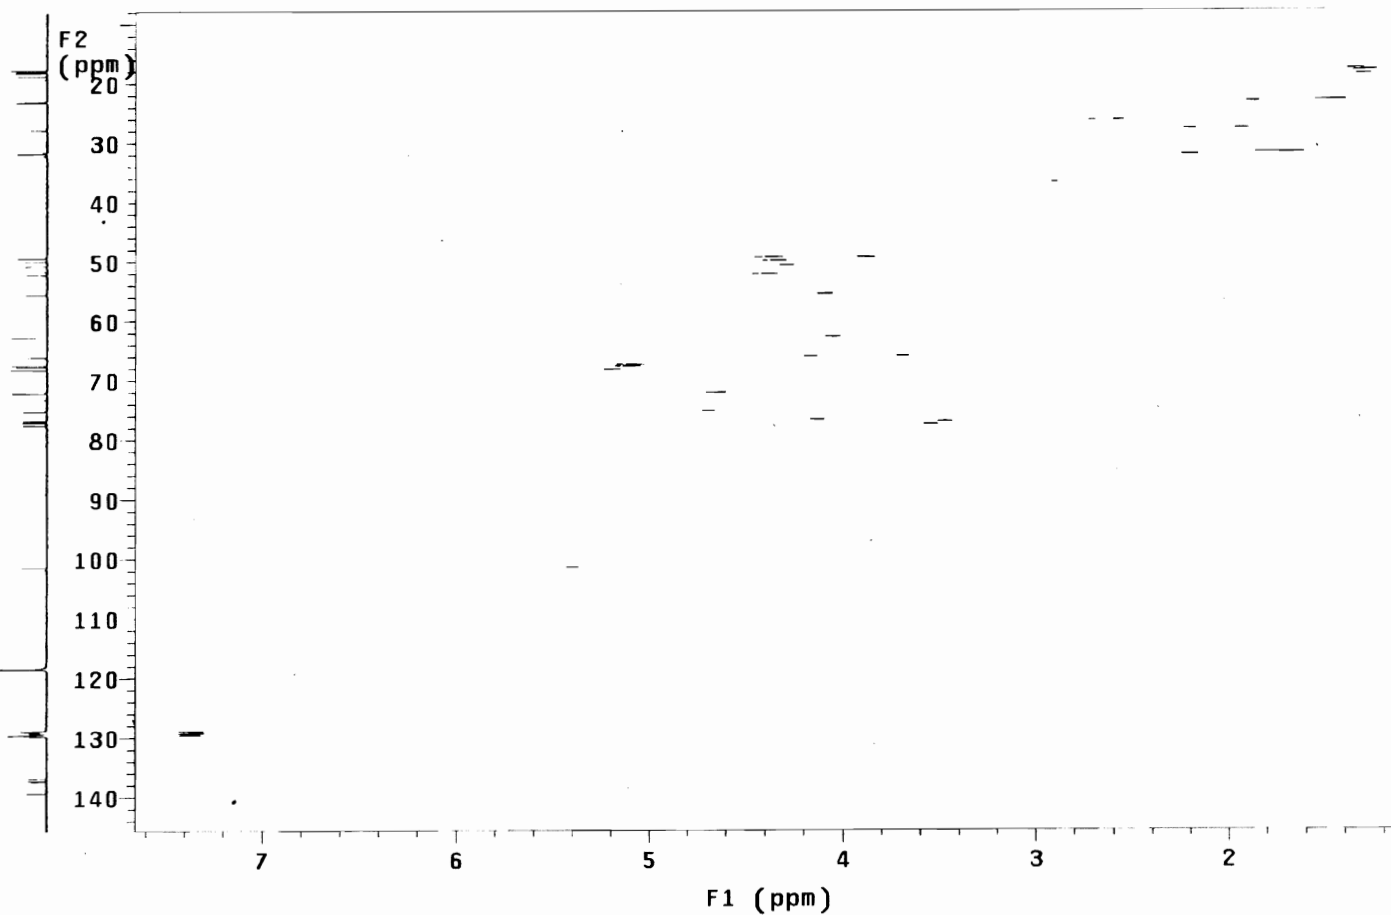

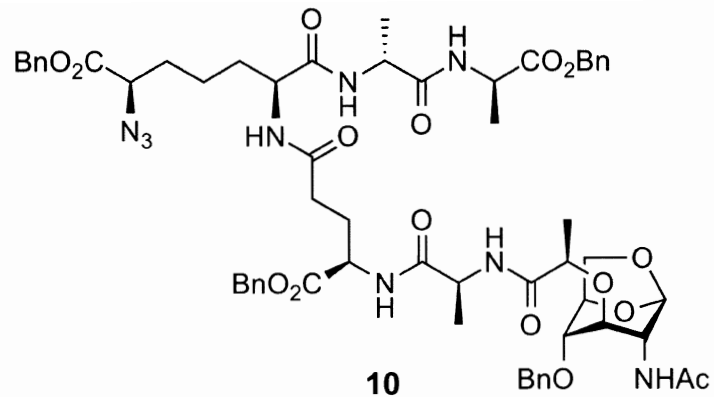

DHL-42

File: xp

Pulse Sequence: HETCOR

Solvent: cd3cn

Temp. 22.0 C / 295.1 K

Operator: dhesek

VNMRS-600 "nmr600"

Relax. delay 1.313 sec

Acq. time 0.187 sec

Width 21929.8 Hz

2D Width 5398.9 Hz

8 repetitions

2 x 128 increments

OBSERVE C13, 150.8387992 MHz

DECOUPLE H1, 599.8787302 MHz

Power 44 dB

on during acquisition

off during delay

WALTZ-16 modulated

DATA PROCESSING

Gauss apodization 0.086 sec

F1 DATA PROCESSING

Gauss apodization 0.022 sec

FT size 8192 x 2048

Total time 52 min, 33 sec

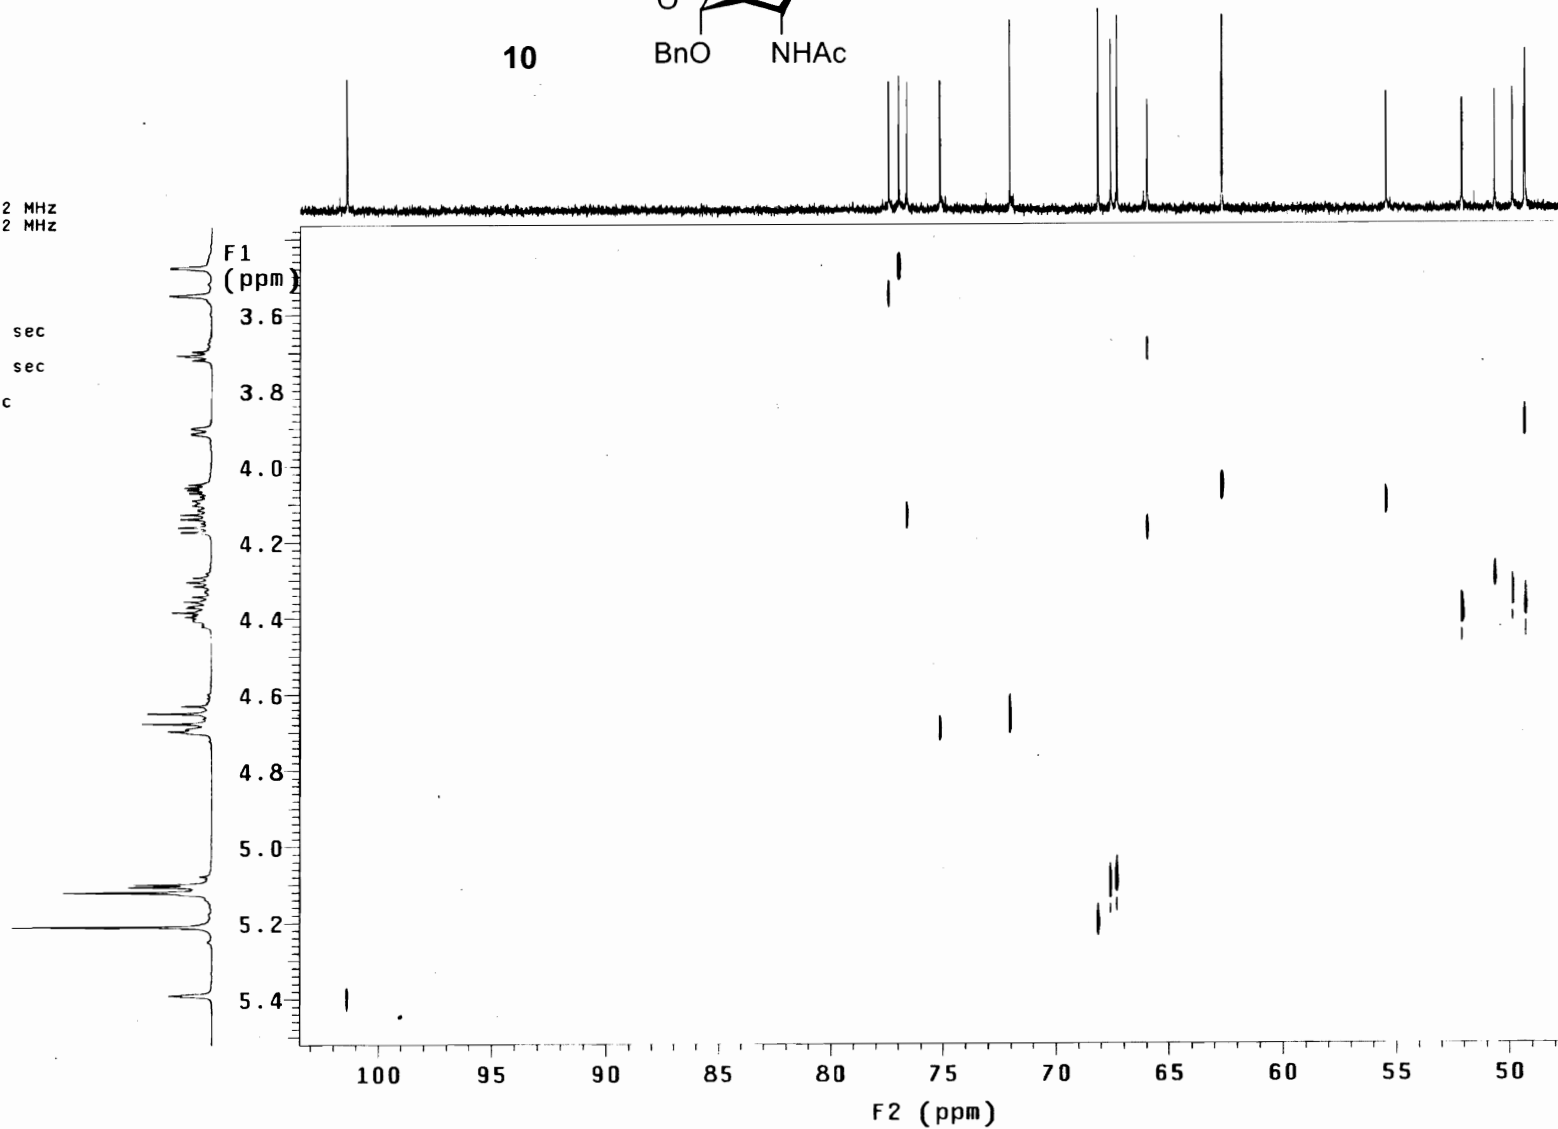

DHL-51

expl Proton

|             |             |            |          |
|-------------|-------------|------------|----------|
| SAMPLE      |             | SPECIAL    |          |
| date        | Feb 16 2008 | temp       | 22.0     |
| solvent     | cd3od       | gain       | not used |
| file        | exp         | spin       | not used |
| ACQUISITION |             | hst        | 0.008    |
| sw          | 9615.4      | pw90       | 11.100   |
| at          | 3.408       | alfa       | 10.000   |
| np          | 65536       | FLAGS      |          |
| fb          | 4000        | il         | n        |
| bs          | 4           | in         | n        |
| ss          | 2           | dp         | y        |
| d1          | 1.000       | hs         | nn       |
| nt          | 16          | PROCESSING |          |
| ct          | 16          | fn         | 131072   |
| TRANSMITTER |             | DISPLAY    |          |
| tn          | H1          | sp         | 257.7    |
| sfrq        | 599.879     | wp         | 4455.3   |
| tof         | 599.8       | rfl        | 1208.5   |
| tpwr        | 61          | rtp        | 0        |
| pw          | 11.100      | rp         | -43.9    |
| DECOUPLER   |             | lp         | 3.3      |
| dn          | C13         | PLOT       |          |
| dof         | 0           | wc         | 250      |
| dm          | nnn         | sc         | 0        |
| dmm         | c           | vs         | 200      |
| dpwr        | 38          | th         | 50       |
| dmf         | 35088       | al         | cdc ph   |

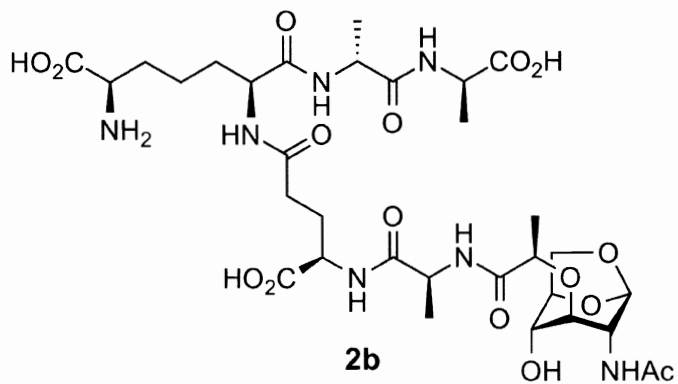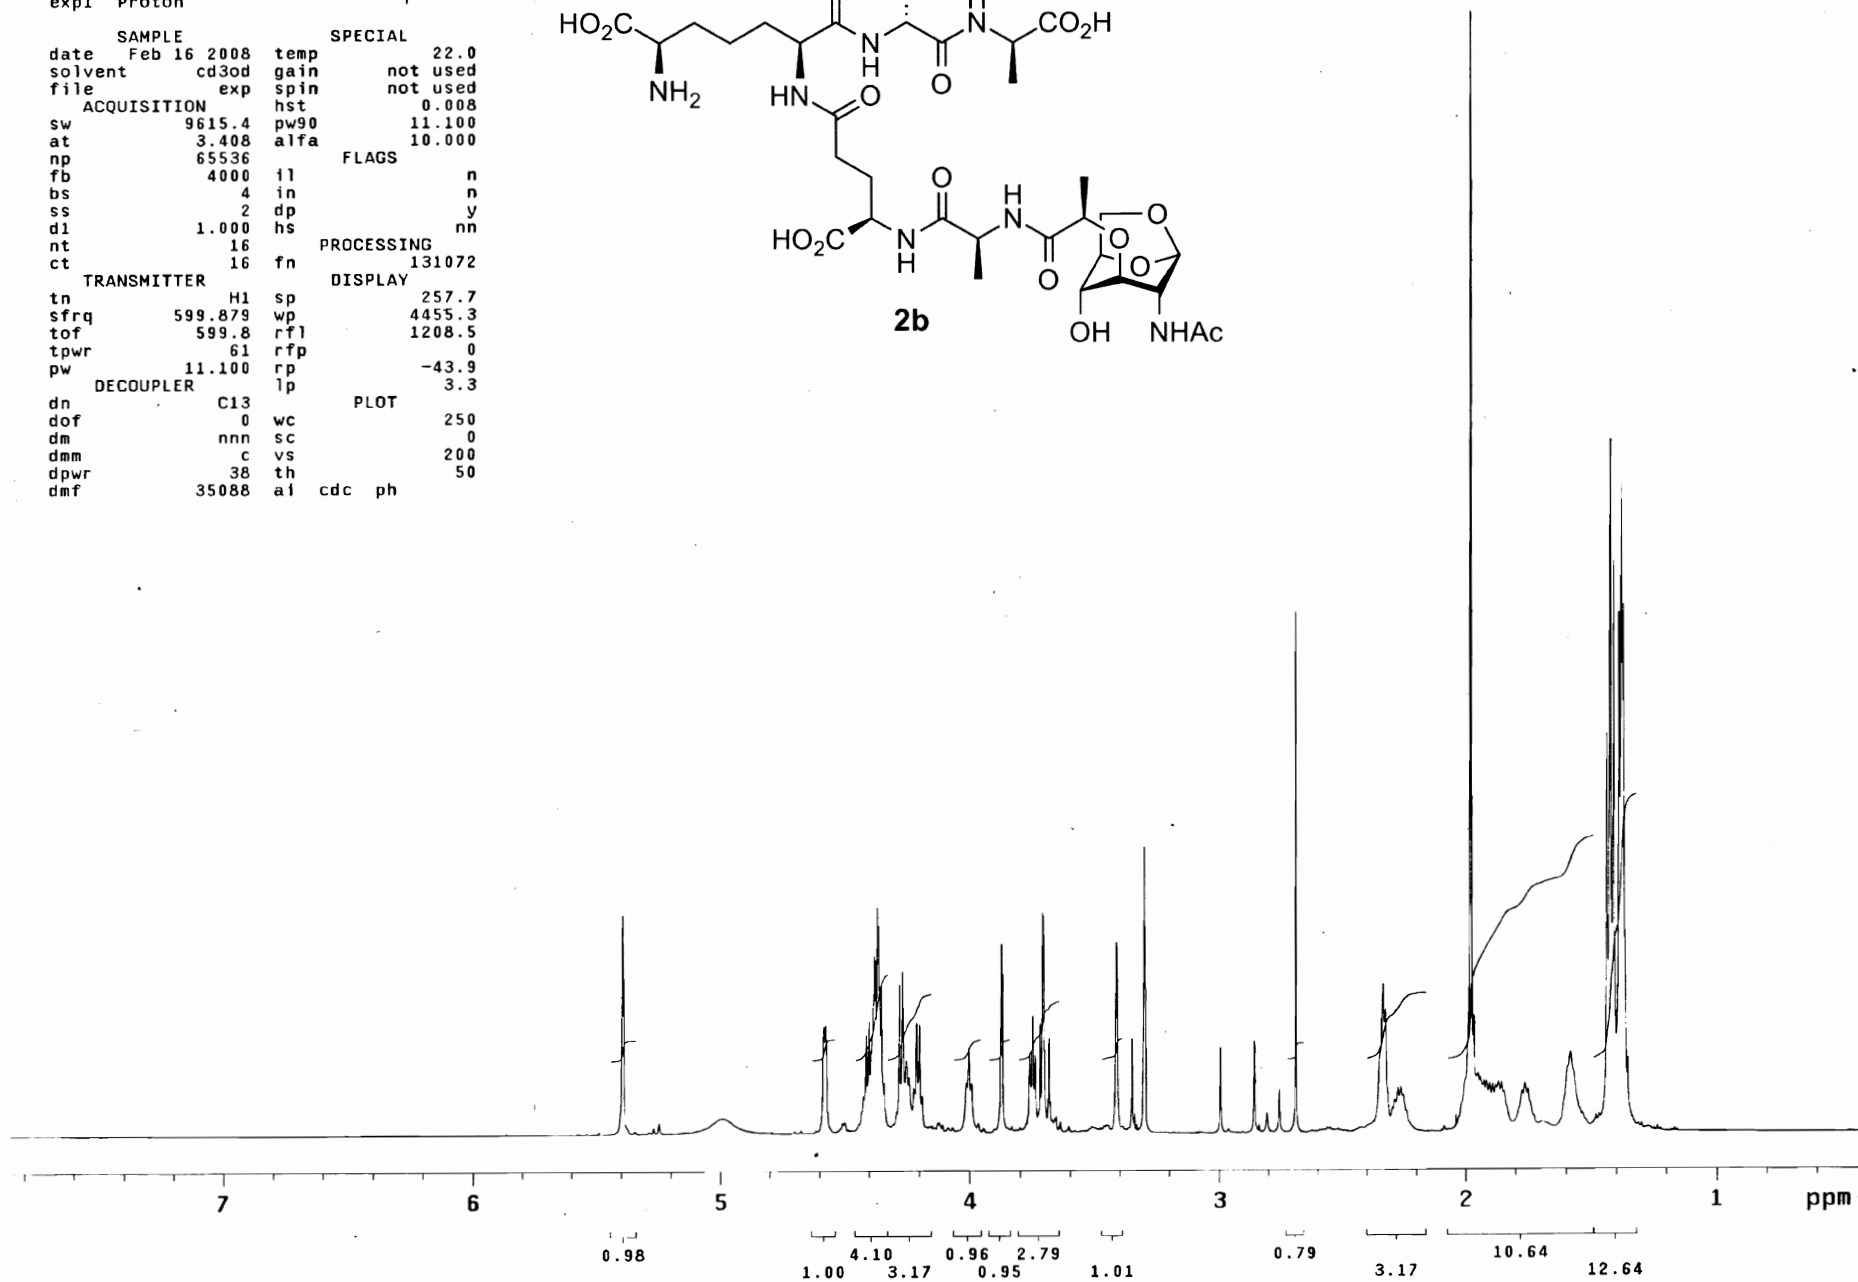

DHL-51

File: xp

Pulse Sequence: gCOSY

Solvent: cd3od  
Temp. 22.0 C / 295.1 K  
Operator: vnmr1  
VNMR5-600 "nmr600"

Relax. delay 1.300 sec  
Acq. time 0.213 sec  
Width 5411.3 Hz  
2D Width 5411.3 Hz  
32 repetitions  
256 increments  
OBSERVE H1, 599.8752210 MHz  
DATA PROCESSING  
Sine bell 0.107 sec  
F1 DATA PROCESSING  
Sine bell 0.095 sec  
FT size 4096 x 4096  
Total time 3 hr, 32 min, 33 sec

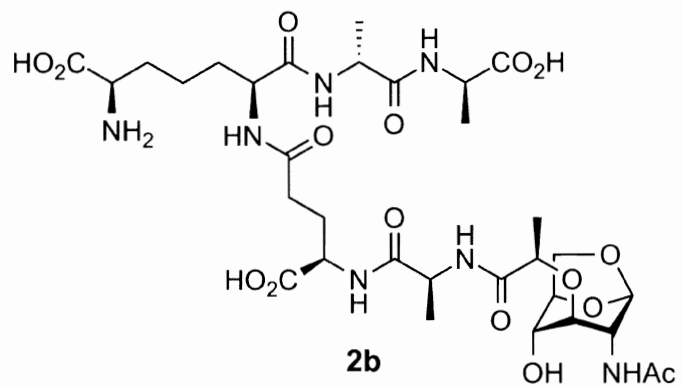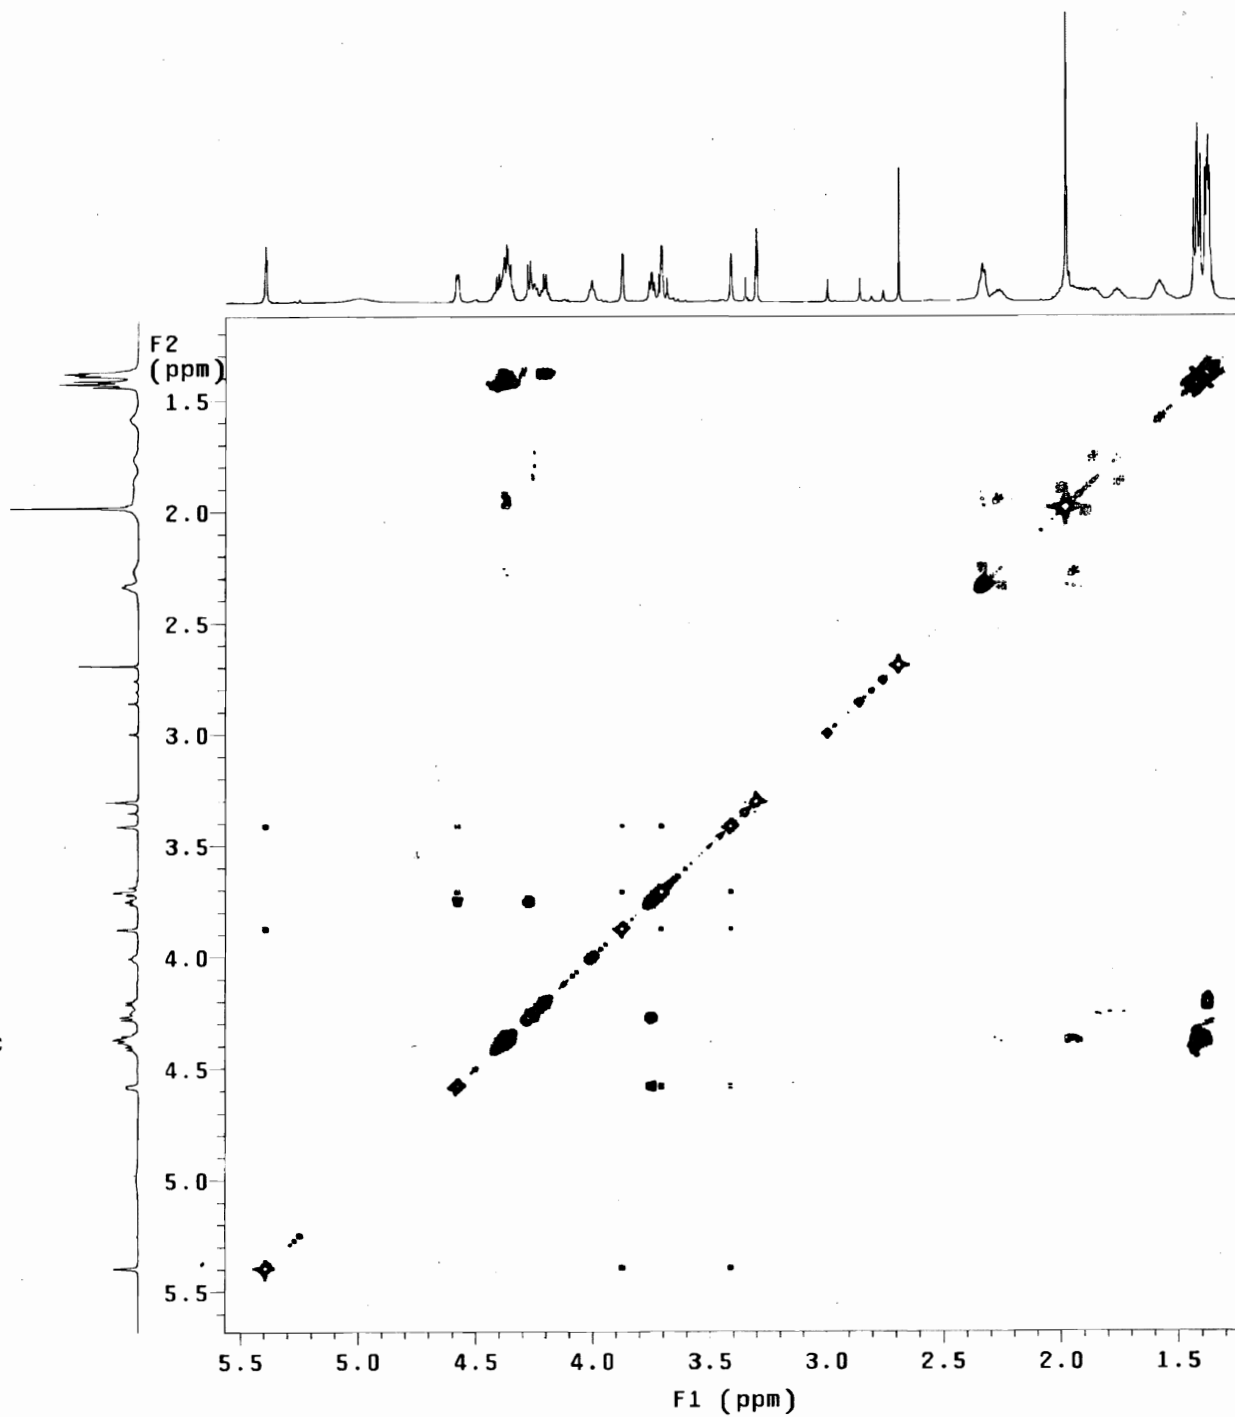



DHL-51

exp2 Carbon

|             |             |            |          |
|-------------|-------------|------------|----------|
| SAMPLE      |             | SPECIAL    |          |
| date        | Feb 16 2008 | temp       | 22.0     |
| solvent     | cd3od       | gain       | not used |
| file        | exp         | spin       | not used |
| ACQUISITION |             | hst        | 0.008    |
| sw          | 36764.7     | pw90       | 7.500    |
| at          | 1.783       | alfa       | 10.000   |
| np          | 131072      | FLAGS      |          |
| fb          | 17000       | il         | n        |
| bs          | 8           | in         | n        |
| d1          | 1.220       | dp         | y        |
| nt          | 2400        | hs         | nn       |
| ct          | 184         | PROCESSING |          |
| TRANSMITTER |             | lb         | 0.50     |
| tn          | C13         | fn         | 262144   |
| sfrq        | 150.855     | DISPLAY    |          |
| tof         | 1542.6      | sp         | 2091.6   |
| tpwr        | 58          | wp         | 25062.8  |
| pw          | 7.500       | rfl        | 9730.6   |
| DECOUPLER   |             | rfp        | 7413.7   |
| dn          | H1          | rp         | 56.0     |
| dof         | 0           | lp         | 2.7      |
| dm          | yyy         | PLOT       |          |
| dmm         | w           | wc         | 250      |
| dpwr        | 44          | sc         | 0        |
| dmf         | 13908       | vs         | 403      |
|             |             | th         | 3        |
|             |             | ai         | cdc ph   |

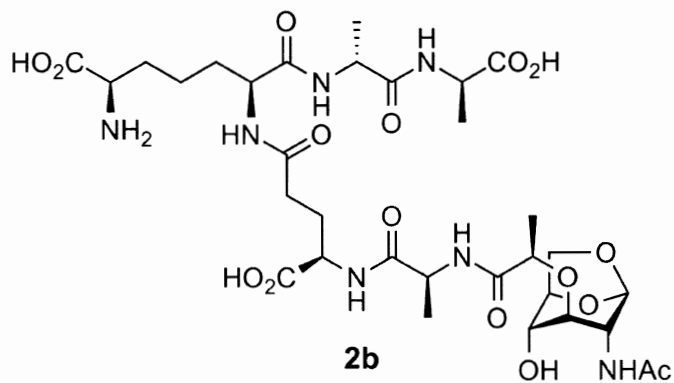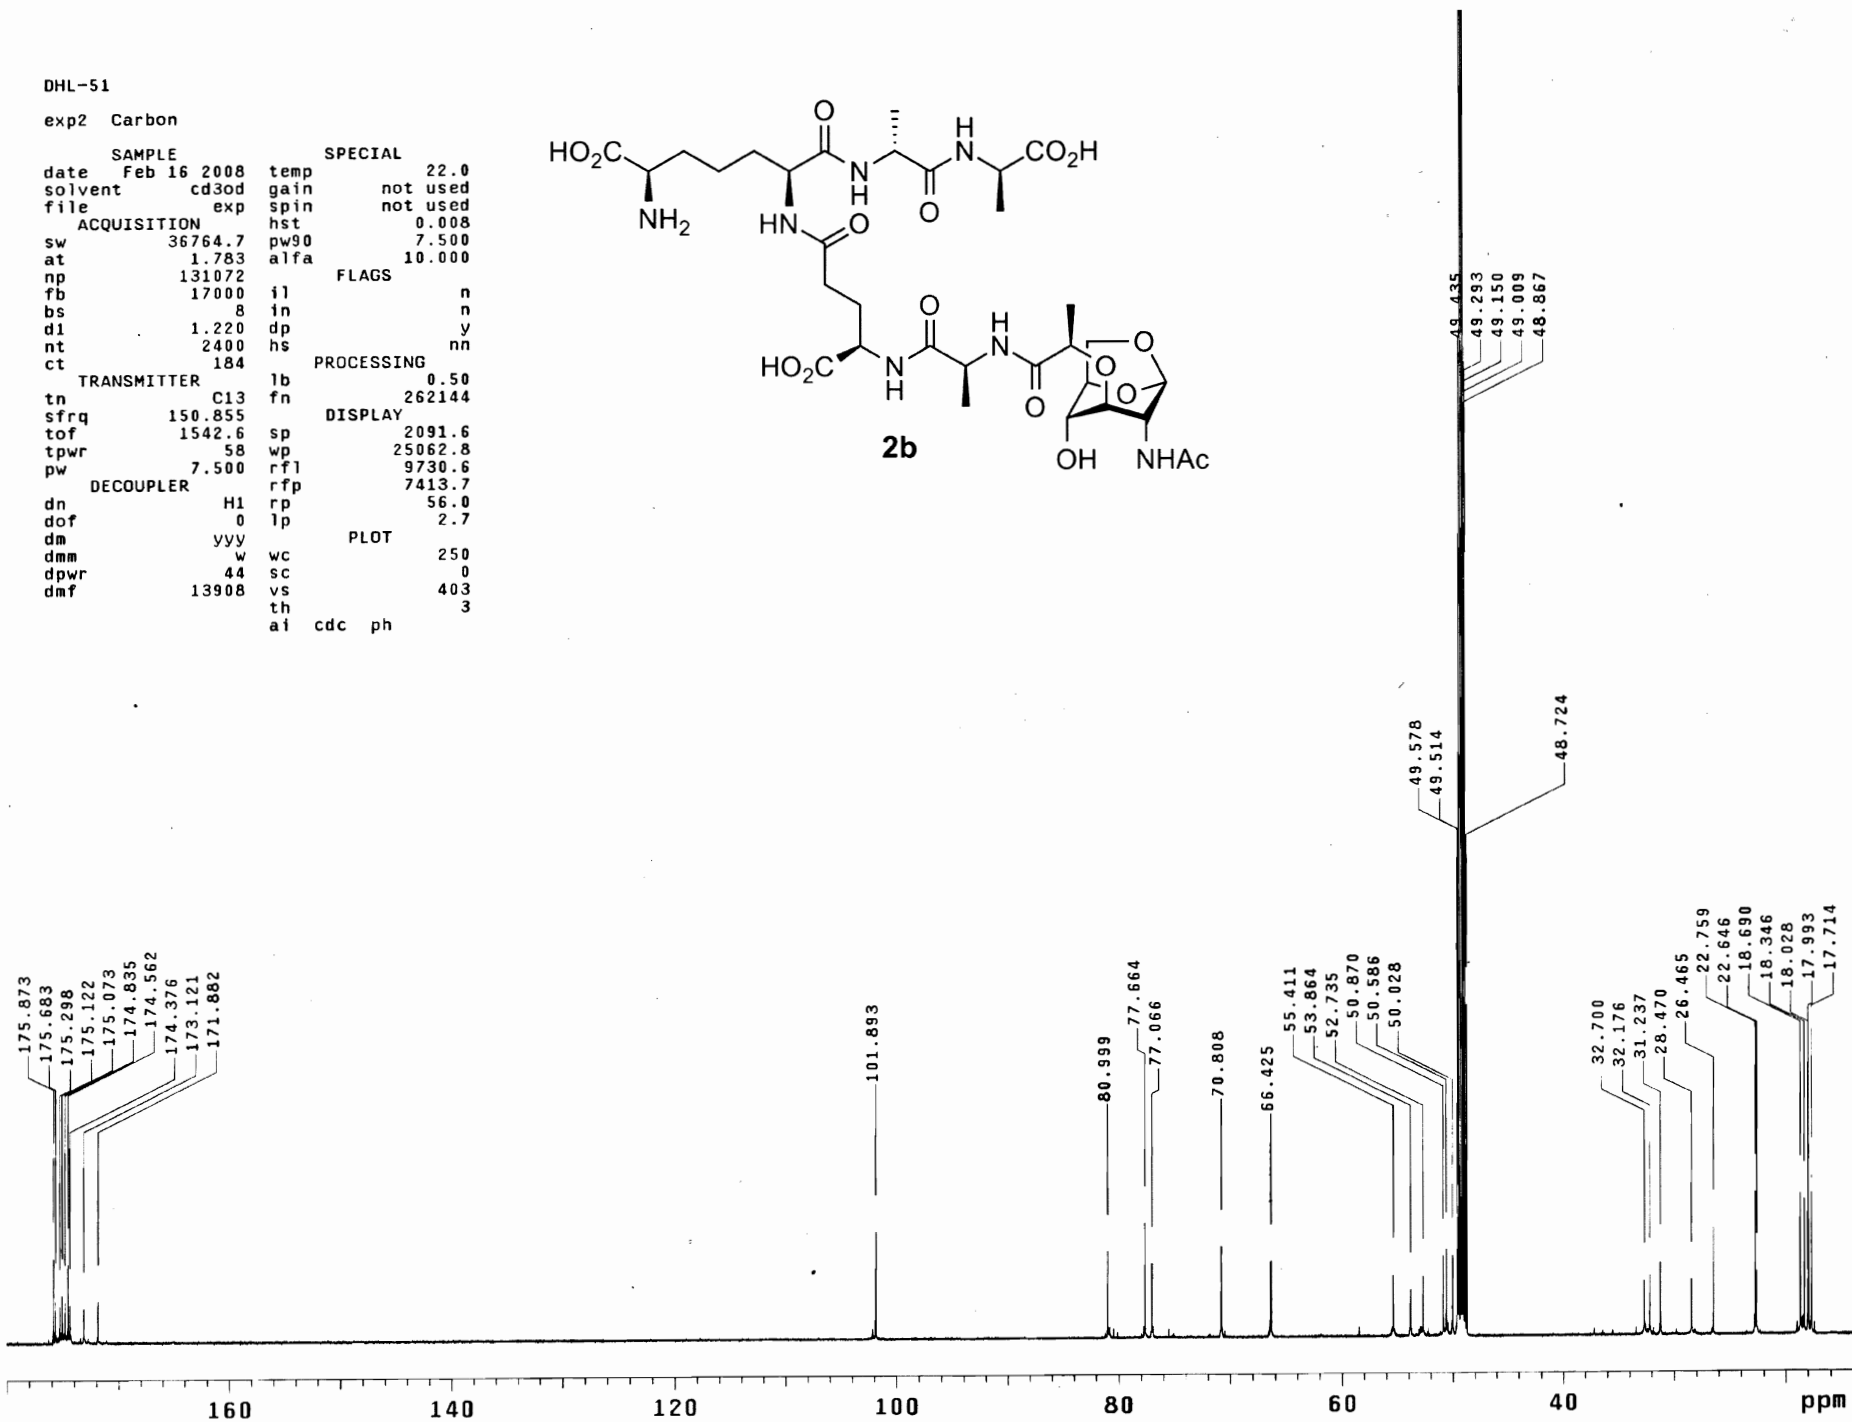

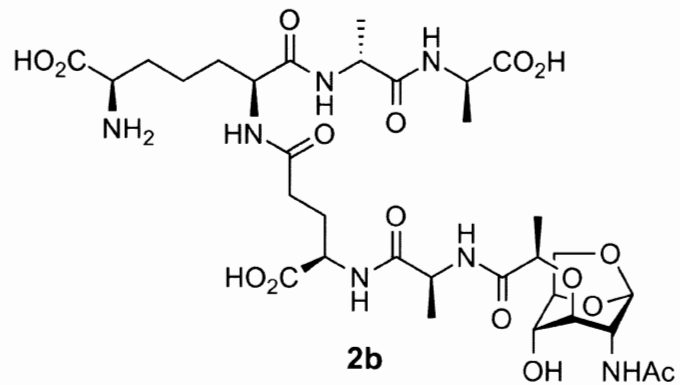

DHL-51

File: xp

Pulse Sequence: DEPT

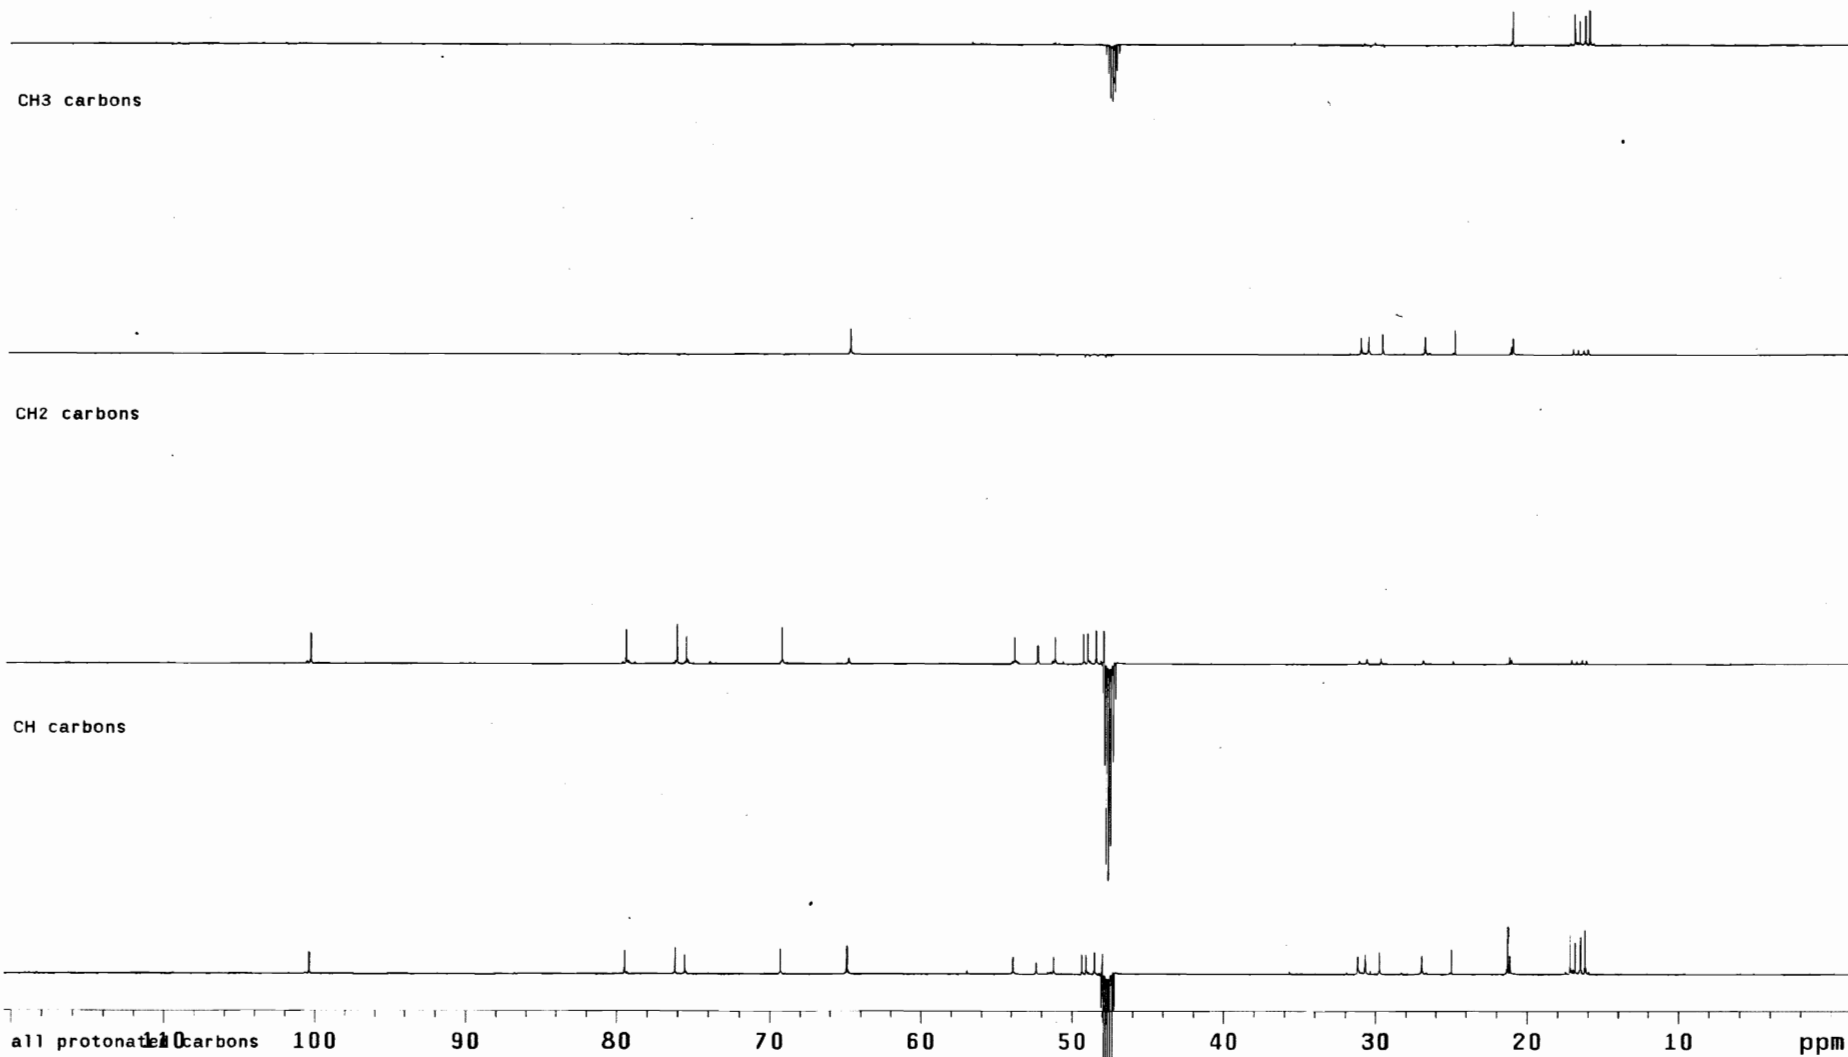

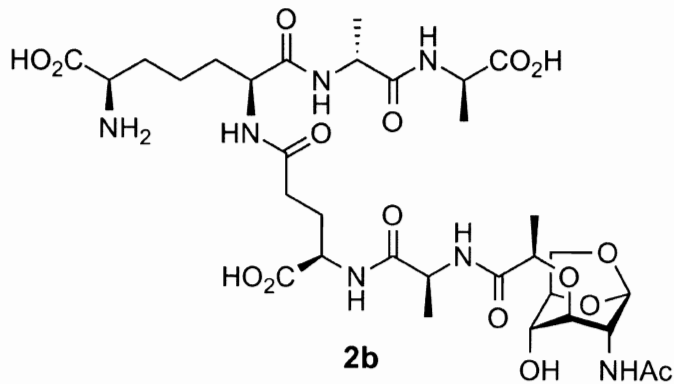

DHL-51

File: xp

Pulse Sequence: HETCOR

Solvent: cd3od

Temp. 22.0 C / 295.1 K

Operator: vnmr1

VNMRS-600 "nmr600"

Relax. delay 1.313 sec

Acq. time 0.187 sec

Width 21929.8 Hz

2D Width 5398.9 Hz

16 repetitions

2 x 258 increments

OBSERVE C13, 150.8385088 MHz

DECOUPLE H1, 599.8773205 MHz

Power 44 dB

on during acquisition

off during delay

WALTZ-16 modulated

DATA PROCESSING

Gauss apodization 0.086 sec

F1 DATA PROCESSING

Gauss apodization 0.044 sec

FT size 8192 x 2048

Total time 3 hr, 33 min, 27 sec

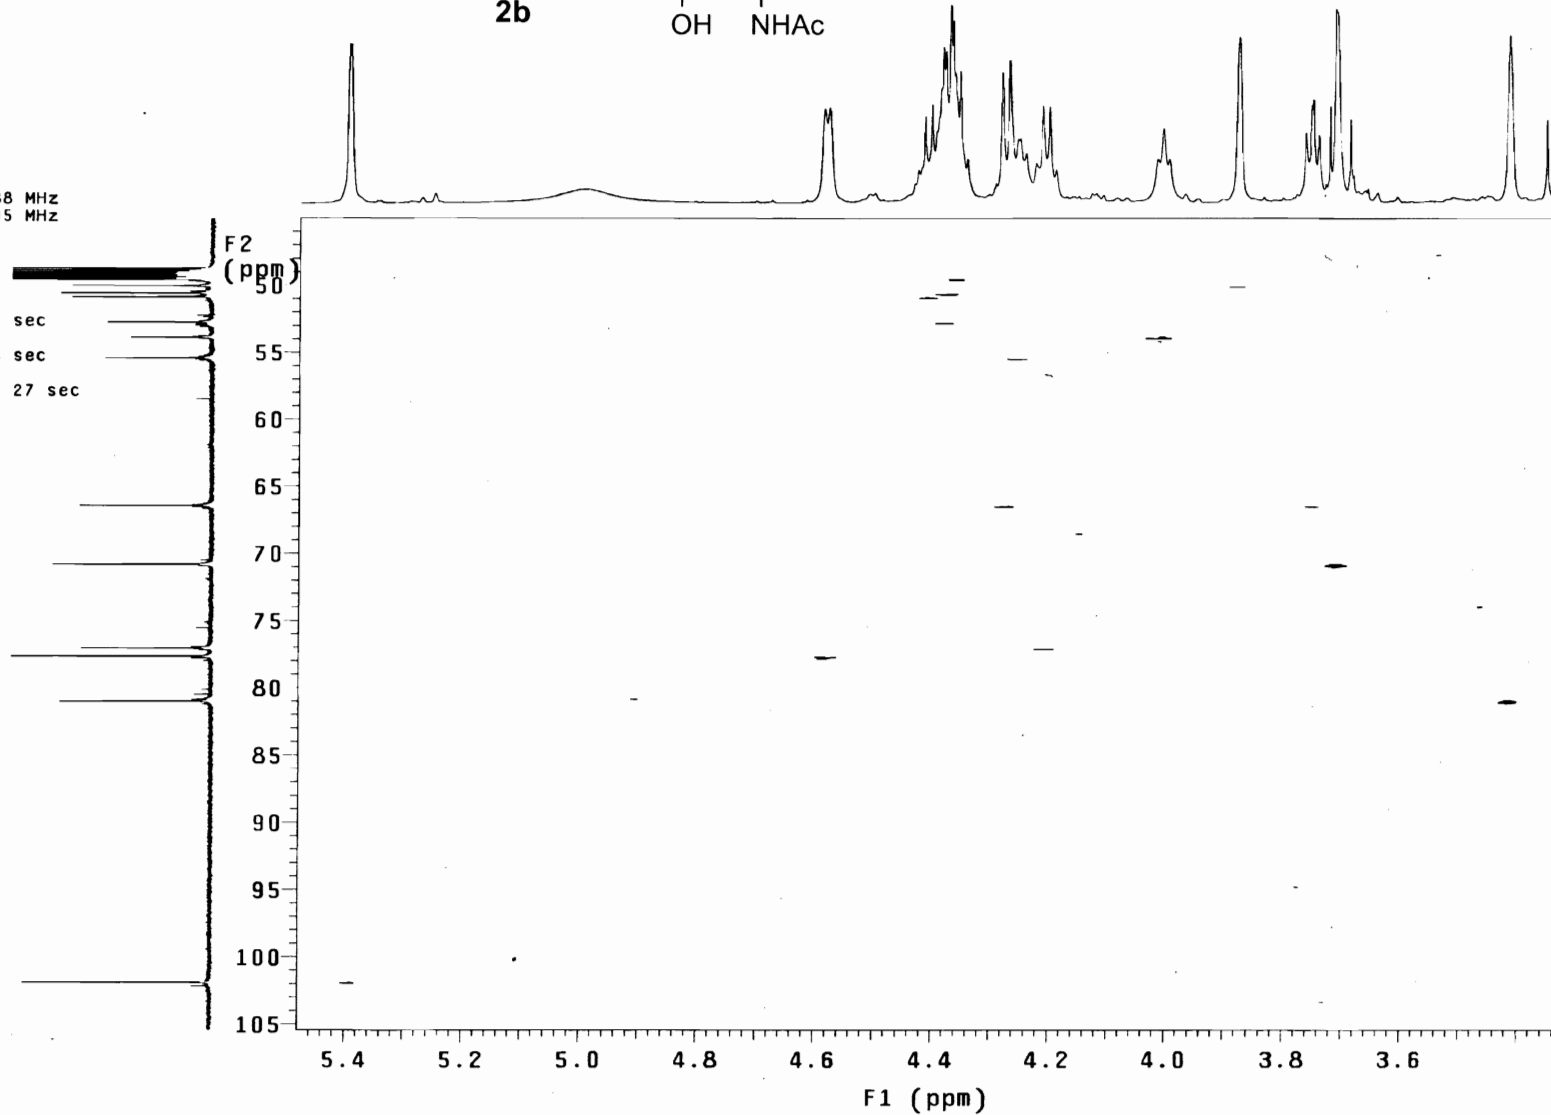

DHL-27\_2

exp1 s2pu1

|                 |             |           |         |
|-----------------|-------------|-----------|---------|
| SAMPLE          |             | DEC. & VT |         |
| date            | Nov 30 2007 | dfrq      | 499.864 |
| solvent         | CDC13       | dn        | H1      |
| file            | exp         | dpwr      | 30      |
| ACQUISITION     |             |           |         |
| sfrq            | 499.864     | dm        | nnn     |
| tn              | H1          | dmm       | c       |
| at              | 5.016       | dmf       | 200     |
| np              | 65536       | dseq      |         |
| sw              | 6533.3      | dres      | 1.0     |
| fb              | 4000        | homo      | n       |
| bs              | 4           | DEC2      |         |
| tpwr            | 61          | dfrq2     | 0       |
| pw              | 13.5        | dn2       |         |
| d1              | 0.100       | dpwr2     | 1       |
| tof             | 269.9       | dof2      | 0       |
| nt              | 16          | dm2       | n       |
| ct              | 16          | dmm2      | c       |
| alock           | n           | dmf2      | 200     |
| gain            | not used    | dseq2     |         |
| FLAGS           |             |           |         |
| il              | n           | dres2     | 1.0     |
| in              | n           | homo2     | n       |
| dp              | y           | dfrq3     | 0       |
| hs              | nn          | dn3       |         |
| DISPLAY         |             |           |         |
| sp              | 639.9       | dpwr3     | 1       |
| wp              | 4455.5      | dof3      | 0       |
| vs              | 102         | dm3       | n       |
| sc              | 0           | dmm3      | c       |
| wc              | 250         | dmf3      | 200     |
| hzmm            | 17.82       | dseq3     |         |
| is              | 200.00      | dres3     | 1.0     |
| rf1             | 510.6       | homo3     | n       |
| PROCESSING      |             |           |         |
| rff             | 0           | wfile     |         |
| th              | 7           | proc      | ft      |
| ins             | 1.000       | fn        | 65536   |
| ai              | ph          | math      | f       |
| werr            |             |           |         |
| wexp process pH |             |           |         |
| wbs             |             |           |         |
| wft             |             |           |         |

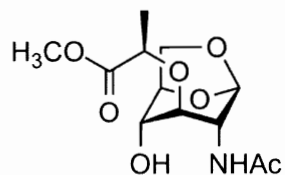

11

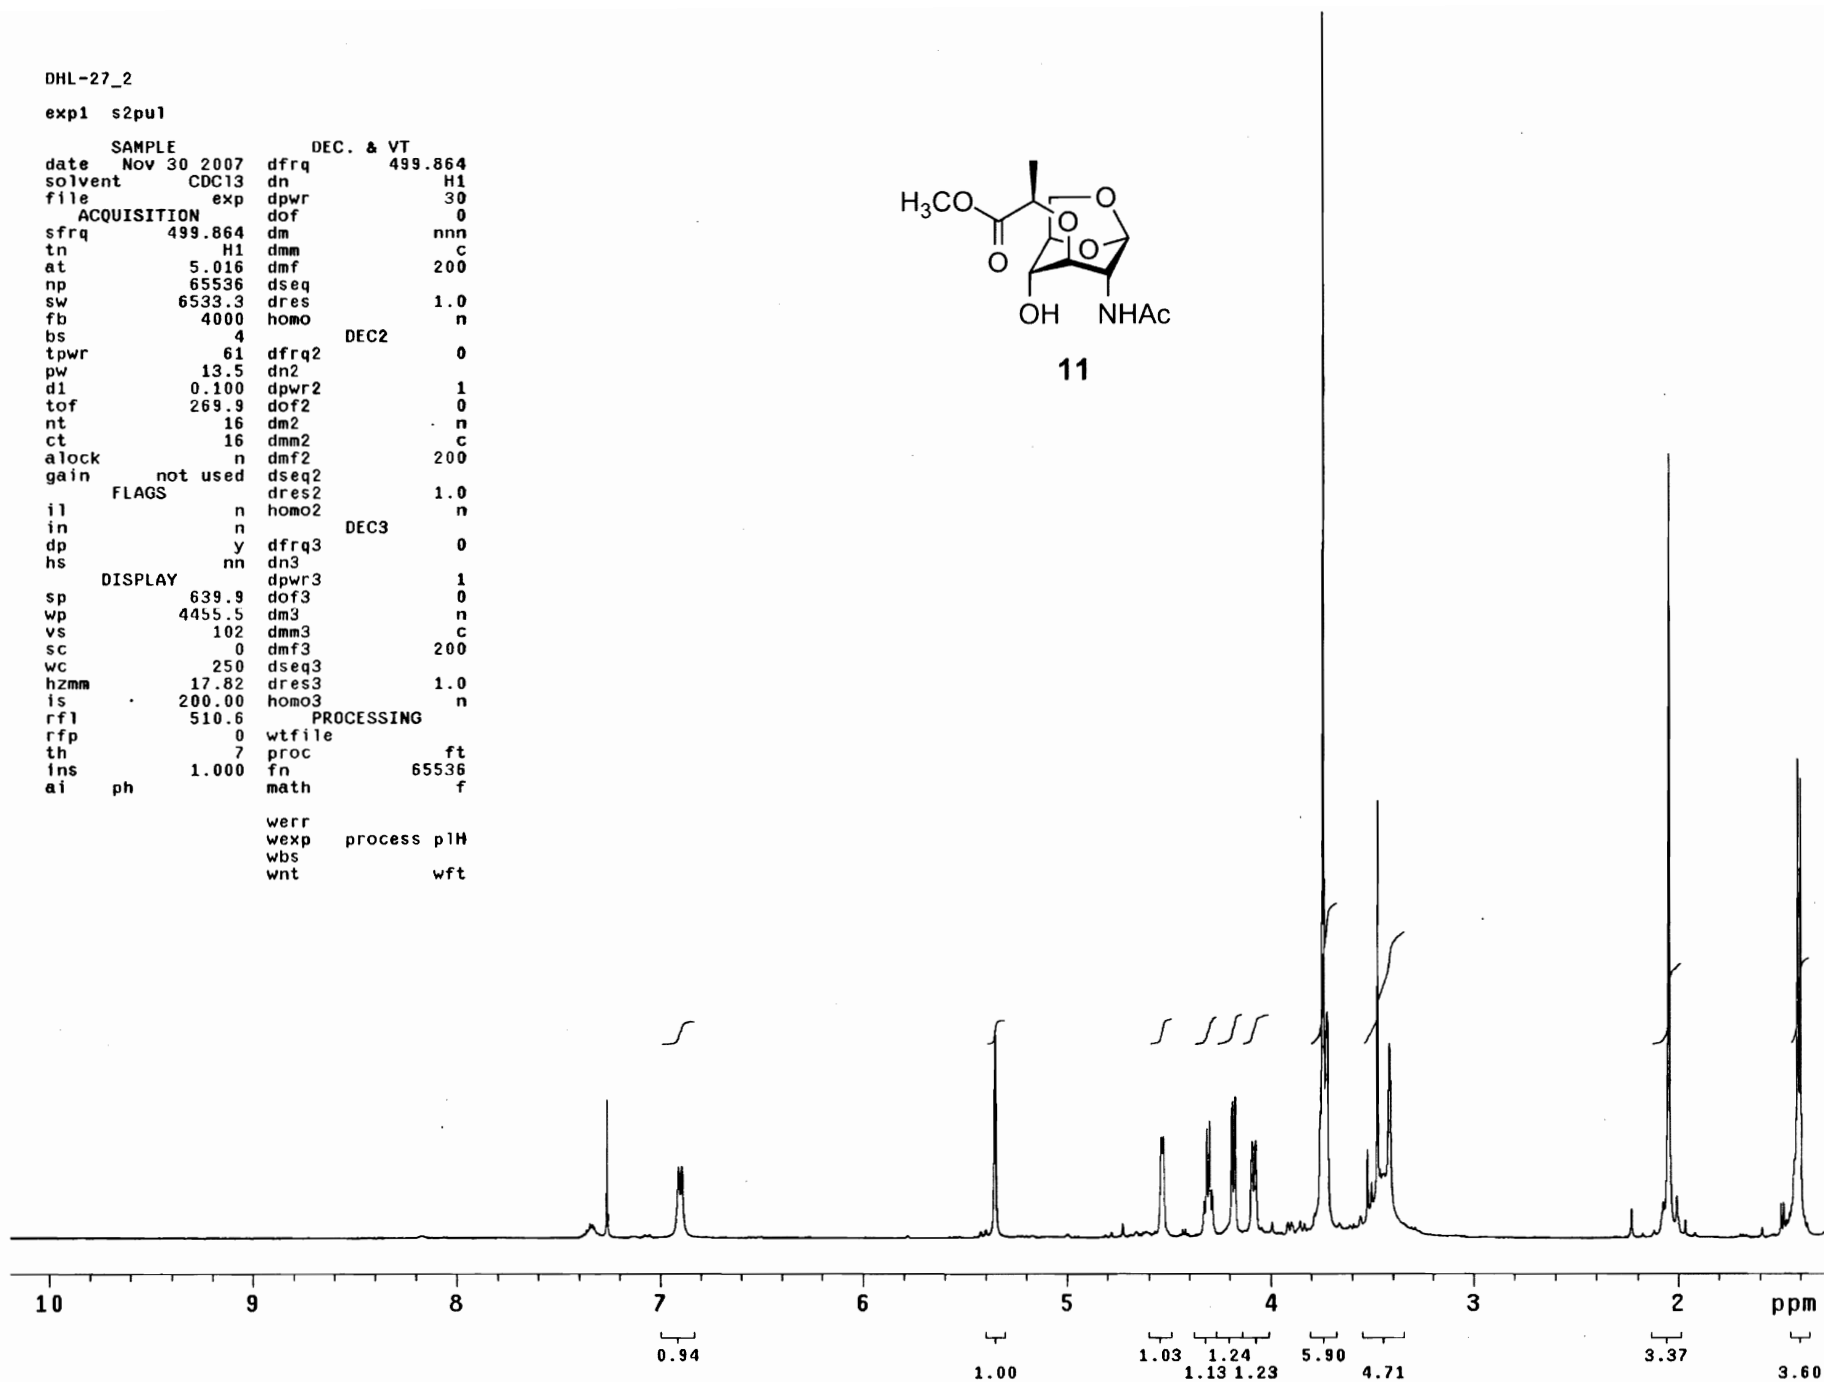

DHL-27\_2

exp2 s2pu1

| SAMPLE      |             | DEC. & VT |         |
|-------------|-------------|-----------|---------|
| date        | Nov 30 2007 | dfrq      | 499.864 |
| solvent     | CDC13       | dn        | H1      |
| file        | exp         | dpwr      | 40      |
| ACQUISITION |             |           |         |
| sfrq        | 125.702     | dm        | yyy     |
| tn          | C13         | dmm       | w       |
| at          | 1.215       | dmf       | 8787.35 |
| np          | 65536       | dseq      |         |
| sw          | 26963.3     | dres      | 1.0     |
| fb          | 15000       | homo      | n       |
| bs          | 4           | DEC2      |         |
| tpwr        | 52          | dfrq2     | 0       |
| pw          | 10.2        | dn2       |         |
| d1          | 1.800       | dpwr2     | 1       |
| tof         | 144.5       | dof2      | 0       |
| nt          | 1200        | dm2       | n       |
| ct          | 80          | dmm2      | c       |
| alock       |             | dmf2      | 10000   |
| gain        | not used    | dseq2     |         |
| FLAGS       |             |           |         |
| ll          | n           | dres2     | 1.0     |
| in          | n           | homo2     | n       |
| dp          | y           | DEC3      |         |
| hs          | nn          | dfrq3     | 0       |
| DISPLAY     |             |           |         |
| sp          | 1225.0      | dn3       |         |
| wp          | 21400.0     | dpwr3     | 1       |
| vs          | 304         | dof3      | 0       |
| sc          | 0           | dm3       | n       |
| wc          | 250         | dmm3      | c       |
| hzmm        | 85.60       | dmf3      | 10000   |
| is          | 500.00      | dseq3     |         |
| rf1         | 11110.6     | dres3     | 1.0     |
| rfp         | 9678.1      | homo3     | n       |
| PROCESSING  |             |           |         |
| th          | 6           | lb        | 1.00    |
| ins         | 100.000     | wfile     |         |
| ai          | cdc ph      | proc      | ft      |
|             |             | fn        | 131072  |
|             |             | math      | f       |

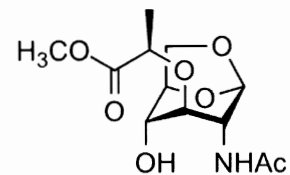

11

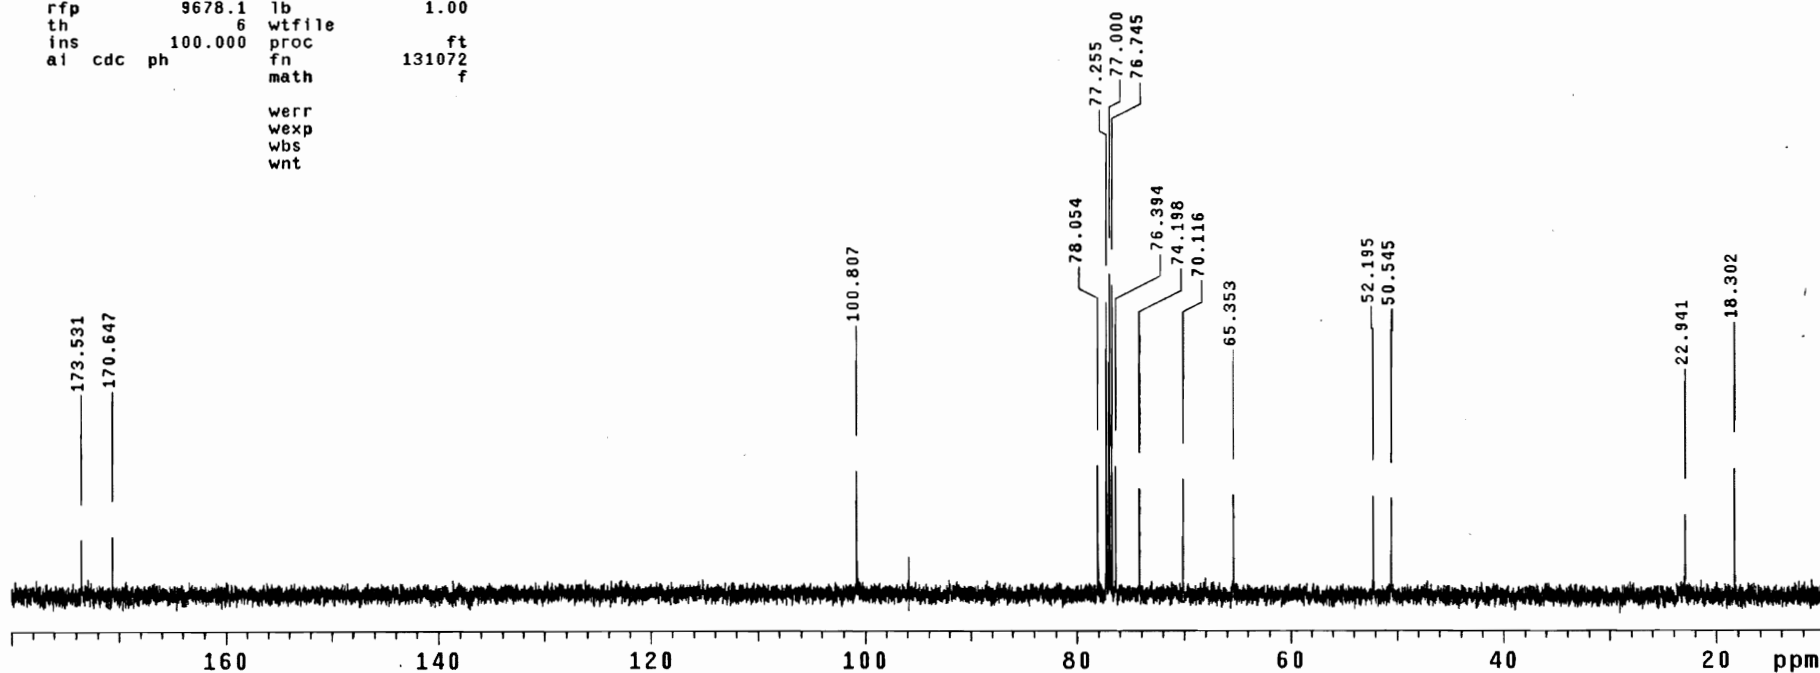

DHL-27\_2

Pulse Sequence: dept

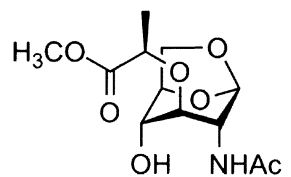

11

CH3 carbons

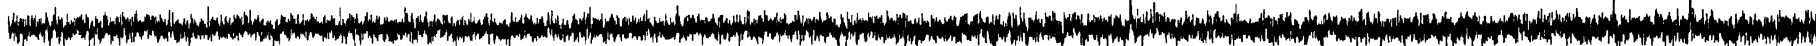

CH2 carbons

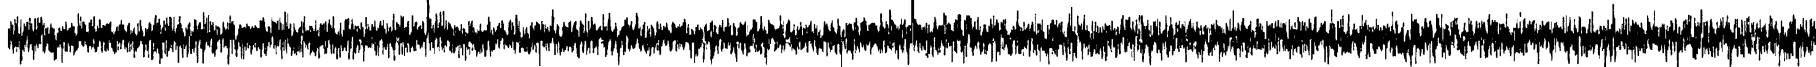

CH carbons

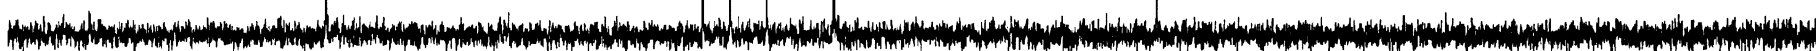

all protonated carbons

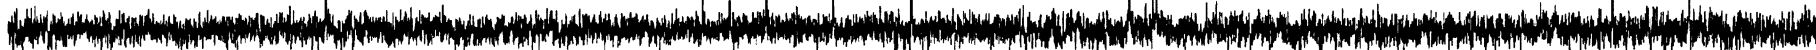

110

100

90

80

70

60

50

40

30

20

ppm

DHL-97

exp4 s2pu1

|             |            |            |            |
|-------------|------------|------------|------------|
| SAMPLE      |            | DEC. & VT  |            |
| date        | Oct 8 2008 | dfrq       | 299.702    |
| solvent     | D2O        | dn         | H1         |
| file        | exp        | dpwr       | 30         |
| ACQUISITION |            | dof        | 0          |
| sfrq        | 299.702    | dm         | nnn        |
| tn          | H1         | dmm        | c          |
| at          | 4.181      | dmf        | 200        |
| np          | 32768      | dseq       |            |
| sw          | 3918.5     | dres       | 1.0        |
| fb          | 2200       | homo       | n          |
| bs          | 8          | PROCESSING |            |
| tpwr        | 57         | wfile      |            |
| pw          | 8.9        | proc       | ft         |
| d1          | 0.100      | fn         | 65536      |
| tof         | 152.8      | math       | f          |
| nt          | 32         |            |            |
| ct          | 32         | werr       |            |
| alock       | n          | wexp       | process pH |
| gain        | not used   | wbs        |            |
| FLAGS       |            | wnt        |            |
| il          | n          |            |            |
| in          | n          |            |            |
| dp          | y          |            |            |
| hs          | nn         |            |            |
| DISPLAY     |            |            |            |
| sp          | -259.9     |            |            |
| wp          | 3918.5     |            |            |
| vs          | 2425       |            |            |
| sc          | 0          |            |            |
| wc          | 250        |            |            |
| hzmm        | 15.67      |            |            |
| is          | 186.15     |            |            |
| rfl         | 1701.5     |            |            |
| rfp         | 1441.6     |            |            |
| th          | 153        |            |            |
| ins         | 1.000      |            |            |
| nm          | cdc ph     |            |            |

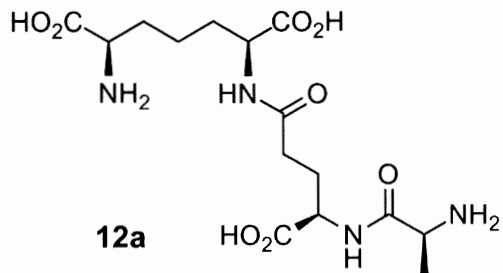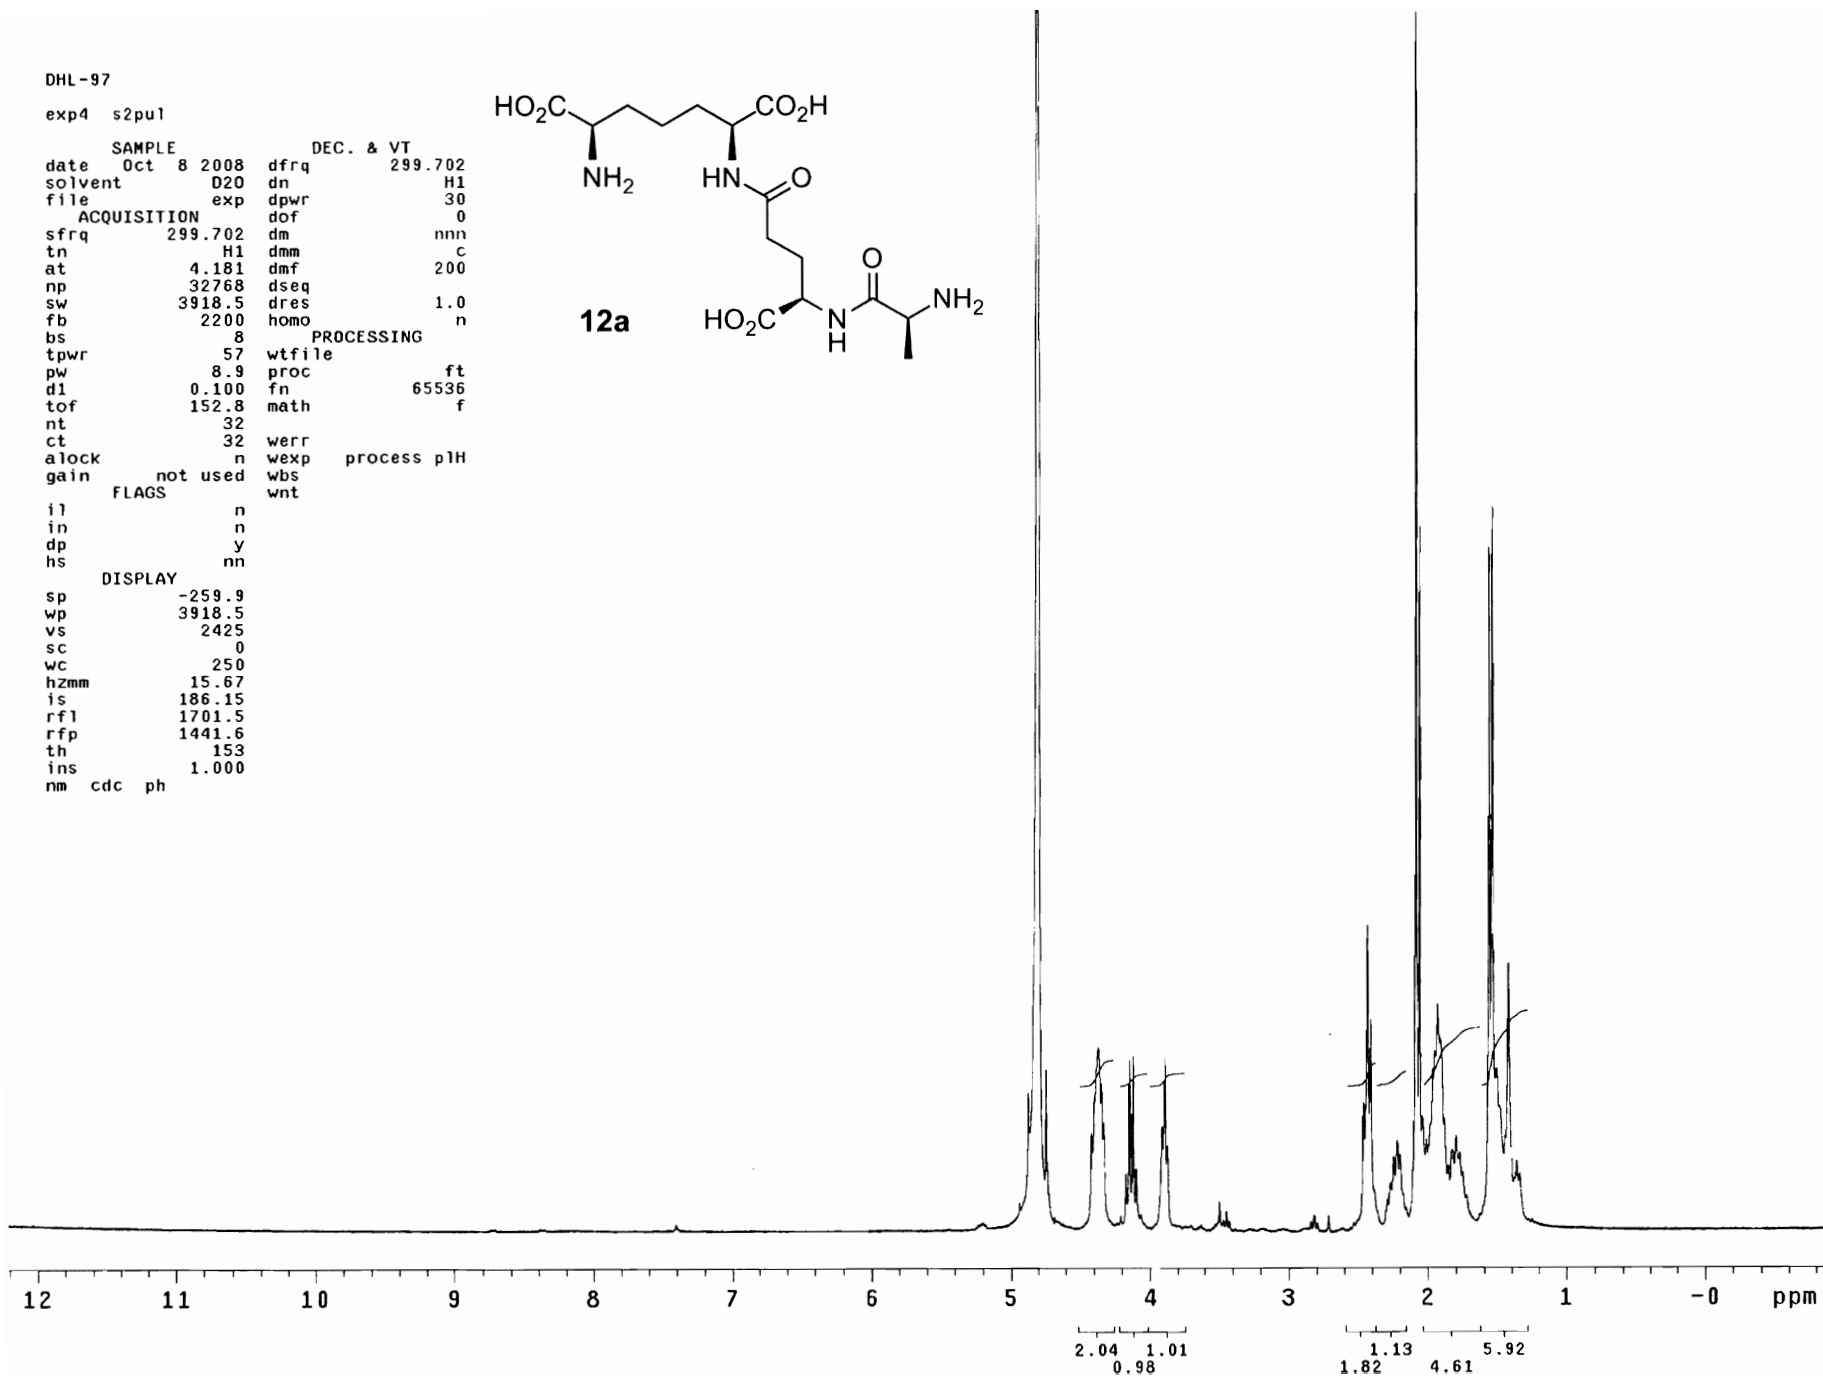

DHL-97

exp2 s2pu1

| SAMPLE      |             | DEC. & VT  |         |
|-------------|-------------|------------|---------|
| date        | Oct 10 2008 | dfrq       | 499.865 |
| solvent     | D2O         | dn         | H1      |
| file        | exp         | dpwr       | 40      |
| ACQUISITION |             | dof        | 0       |
| sfrq        | 125.703     | dm         | yyy     |
| tn          | C13         | dmm        | w       |
| at          | 1.215       | dmf        | 8787.35 |
| np          | 65536       | dseq       |         |
| sw          | 26963.3     | dres       | 1.0     |
| fb          | 15000       | homo       | n       |
| bs          | 4           | DEC2       |         |
| tpwr        | 52          | dfrq2      | 0       |
| pw          | 10.2        | dn2        |         |
| d1          | 1.800       | dpwr2      | 1       |
| tof         | 144.5       | dof2       | 0       |
| nt          | 2400        | dm2        | n       |
| ct          | 1608        | dmm2       | c       |
| alock       | n           | dmf2       | 10000   |
| gain        | not used    | dseq2      |         |
| FLAGS       |             | dres2      | 1.0     |
| il          | n           | homo2      | n       |
| in          | n           | DEC3       |         |
| dp          | y           | dfrq3      | 0       |
| hs          | nn          | dn3        |         |
| DISPLAY     |             | dpwr3      | 1       |
| sp          | 1242.0      | dof3       | 0       |
| wp          | 21470.7     | dm3        | n       |
| vs          | 636         | dmm3       | c       |
| sc          | 0           | dmf3       | 10000   |
| wc          | 250         | dseq3      |         |
| hzmm        | 85.88       | dres3      | 1.0     |
| is          | 500.00      | homo3      | n       |
| rf1         | 1519.4      | PROCESSING |         |
| rfp         | 174.7       | lb         | 1.00    |
| th          | 4           | wfile      |         |
| ins         | 100.000     | proc       | ft      |
| ai          | cdc ph      | fn         | 131072  |
|             |             | math       | f       |

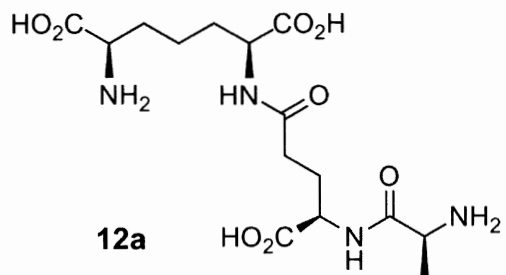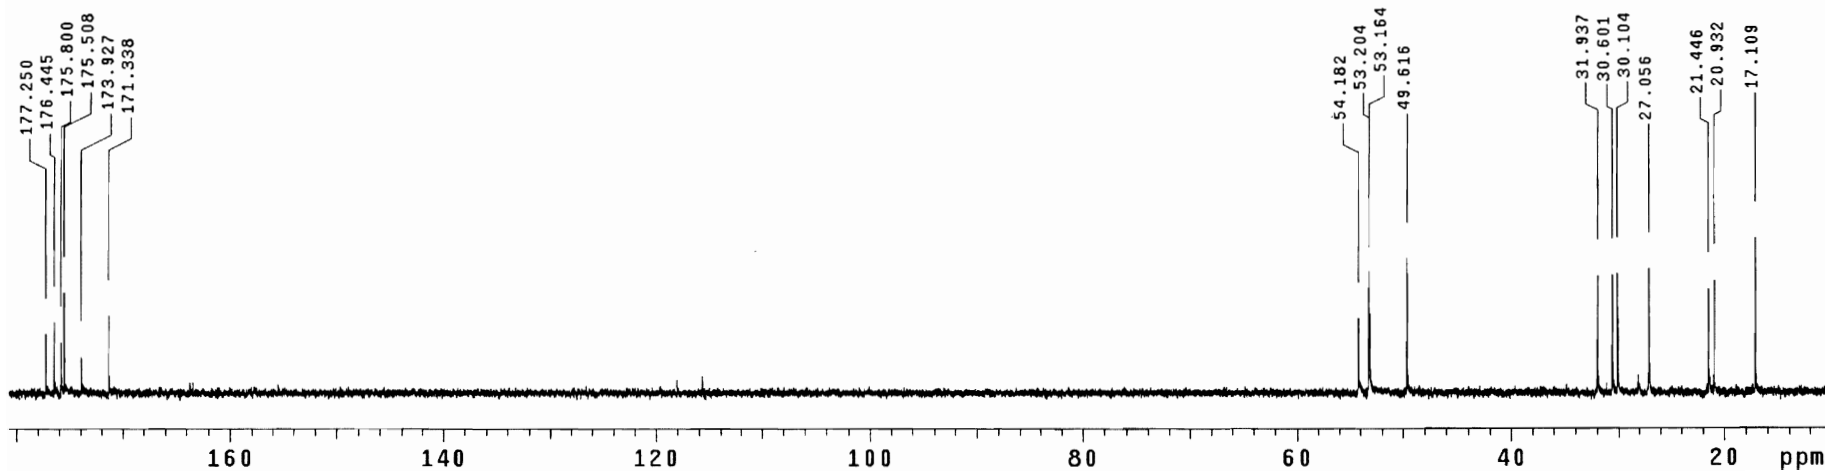



DHL-97

Pulse Sequence: hetcor

Solvent: D2O

Ambient temperature

User: 1-14-87

INOVA-500 "nmr2a.chem.nd.edu"

Relax. delay 1.500 sec

Acq. time 0.111 sec

Width 18403.5 Hz

2D Width 2068.9 Hz

8 repetitions

256 increments

OBSERVE C13, 125.6904319 MHz

DECOUPLE H1, 499.8639194 MHz

Power 40 dB

on during acquisition

off during delay

WALTZ-16 modulated

DATA PROCESSING

Line broadening 1.0 Hz

F1 DATA PROCESSING

Line broadening 0.3 Hz

FT size 4096 x 512

Total time 58 min, 2 sec

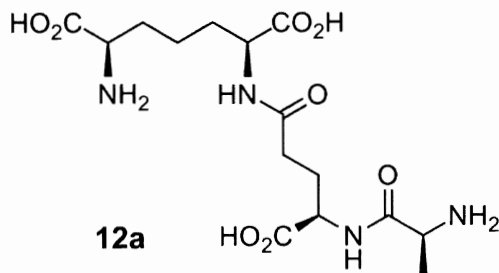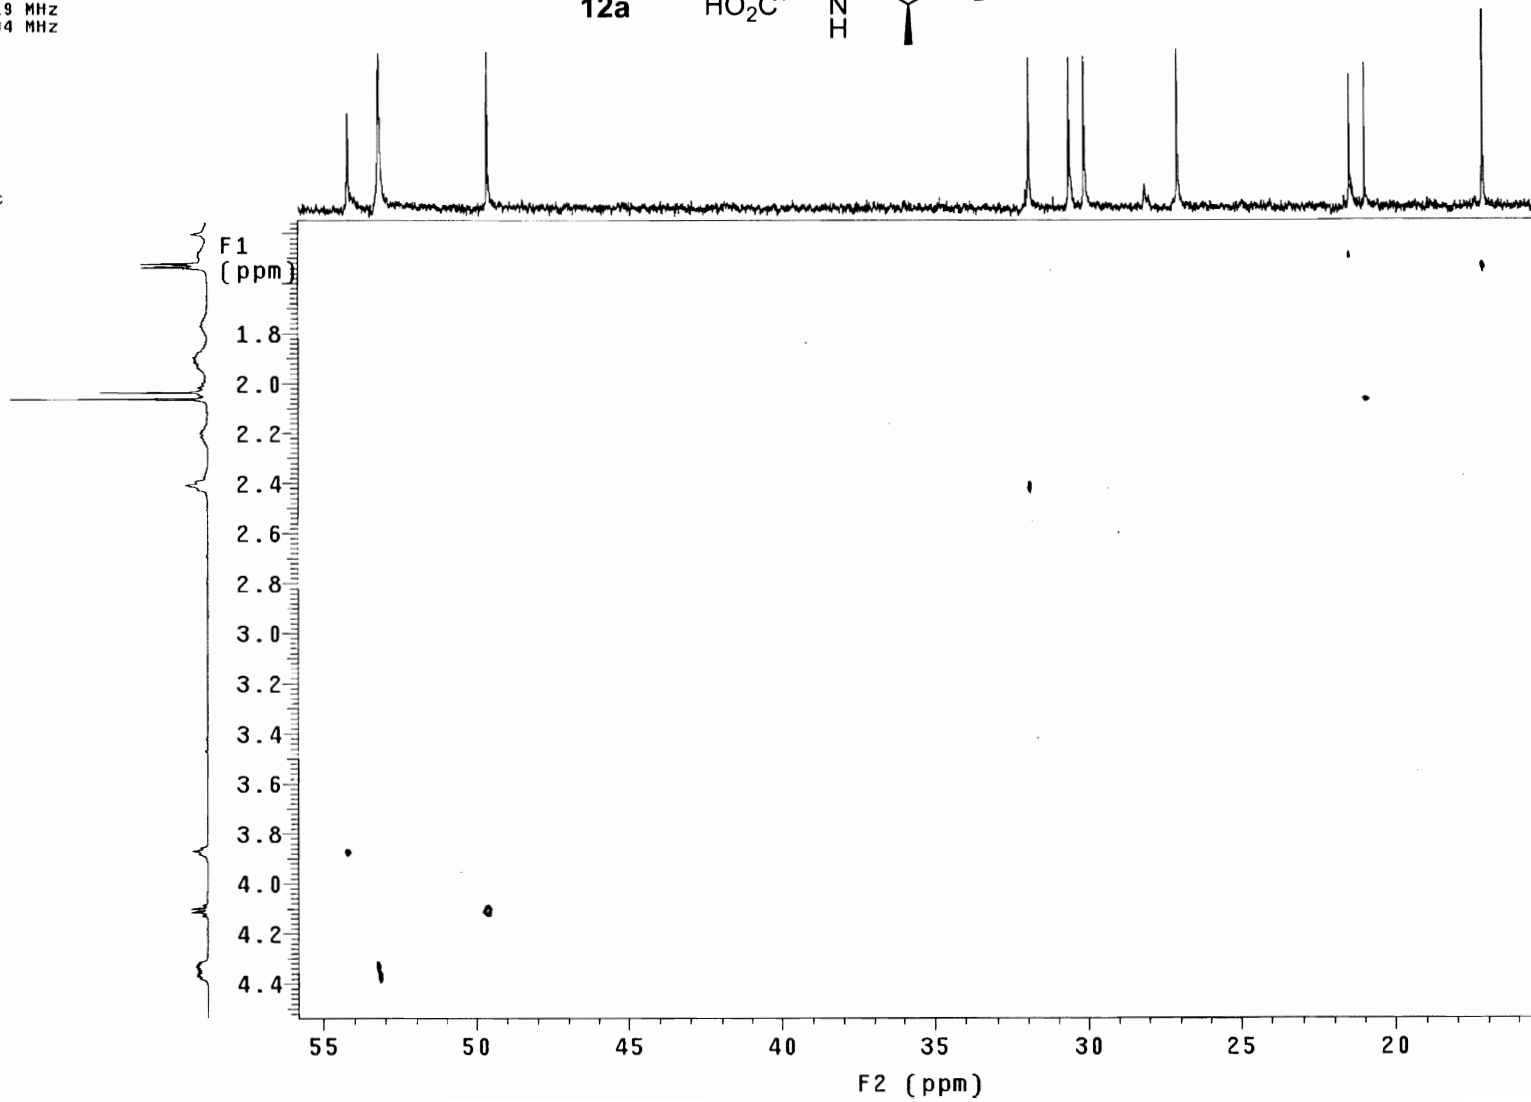

Supplement: NIHMS187488-supplement-Supporting_Information.pdf [file NIHMS187488-supplement-Supporting_Information.pdf]
